# Supplementary material
Source: PubMed Central journal article supplement (PMC4119785)
Supplement: NIHMS568869-supplement-1.pdf [file NIHMS568869-supplement-1.pdf]

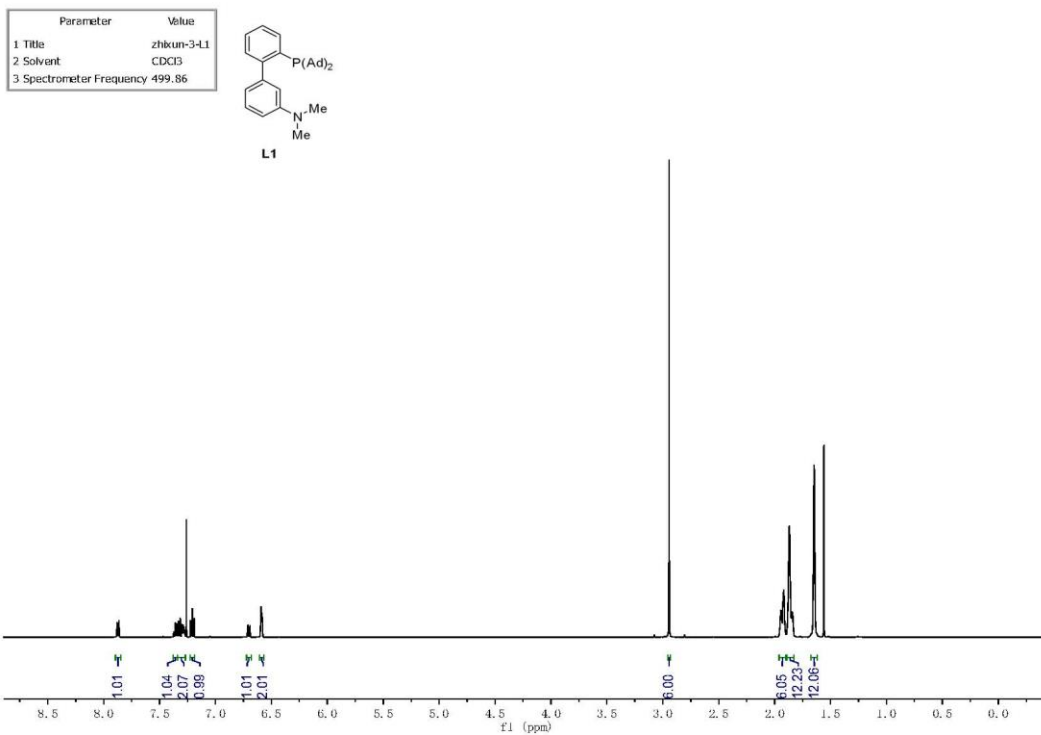

Supplementary Figure 1.  $^1\text{H}$  NMR spectrum of L1.

Parameter Value  
Title wyz7-296-7-C13  
Solvent CDCl3  
Spectrometer Frequency 125.70  
Nucleus 13C

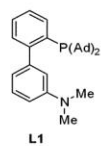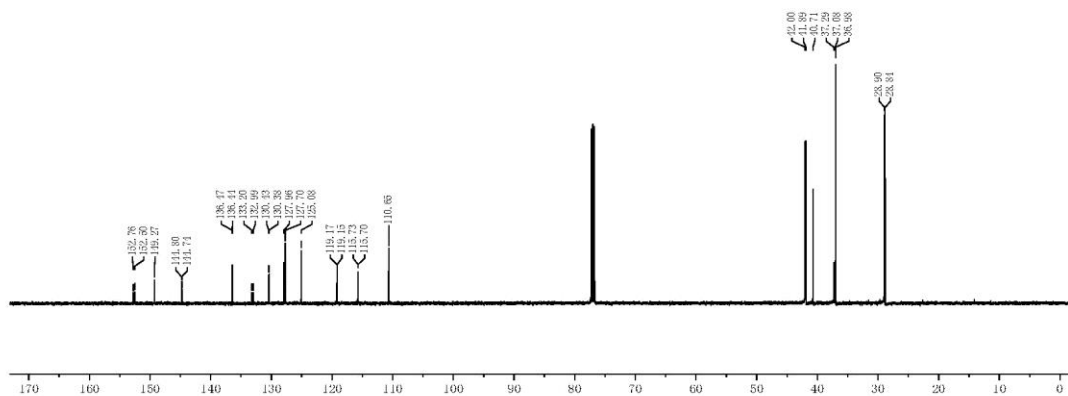

Supplementary Figure 2. <sup>13</sup>C NMR spectrum of L1.

| Parameter              | Value             |
|------------------------|-------------------|
| Title                  | wyz7-296-7-p31    |
| Solvent                | cdCl <sub>3</sub> |
| Spectrometer Frequency | 161.90            |
| Nucleus                | <sup>31</sup> P   |

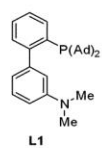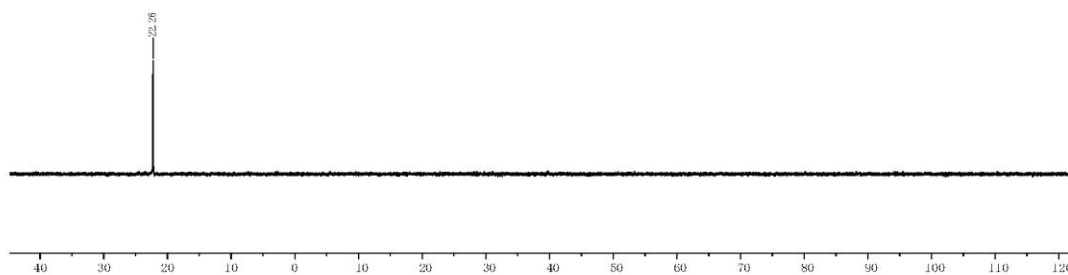

Supplementary Figure 3. <sup>31</sup>P NMR spectrum of L1.

## Single Mass Analysis

Tolerance = 3.0 mDa / DBE: min = -1.5, max = 50.0

Selected filters: None

Monoisotopic Mass, Even Electron Ions

3843 formula(e) evaluated with 17 results within limits (all results (up to 1000) for each mass)

Elements Used:

C: 0-100 H: 0-100 N: 0-10 O: 0-10 P: 0-2 Na: 0-1

Wang/Zhang, wylL1, mw 497; ESI+

ZHA102213MA1 142 (2.700) Cn (Cen,4, 60.00, Ar); Sm (SG, 4x3.00); Cm (83:151)

UCSB CHEM BIOCHEM QTOF2

TOF MS ES+

1.01e3

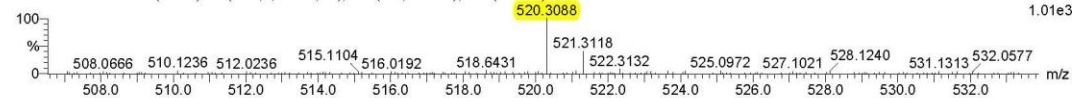

Minimum: -1.5  
Maximum: 50.0

| Mass     | Calc. Mass | mDa  | PPM  | DBE  | i-FIT | Formula            |
|----------|------------|------|------|------|-------|--------------------|
| 520.3088 | 520.3085   | 0.3  | 0.6  | 4.5  | 13.8  | C27 H49 N O3 P2 Na |
|          | 520.3093   | -0.5 | -1.0 | 12.5 | 3.1   | C31 H43 N3 O2 P    |
|          | 520.3083   | 0.5  | 1.0  | 8.5  | 15.8  | C25 H44 N7 O P2    |
|          | 520.3095   | -0.7 | -1.3 | 4.5  | 25.6  | C21 H42 N7 O8      |
|          | 520.3098   | -1.0 | -1.9 | 0.5  | 23.6  | C23 H47 N O10 Na   |
|          | 520.3076   | 1.2  | 2.3  | 17.5 | 0.6   | C33 H38 N5 O       |
|          | 520.3101   | -1.3 | -2.5 | 1.5  | 40.9  | C18 H44 N9 O5 P Na |
|          | 520.3071   | 1.7  | 3.3  | 1.5  | 35.5  | C19 H43 N7 O8 Na   |
|          | 520.3069   | 1.9  | 3.7  | 9.5  | 7.1   | C29 H44 N3 O2 P Na |
|          | 520.3069   | 1.9  | 3.7  | 3.5  | 20.8  | C24 H48 N3 O5 P2   |
|          | 520.3109   | -2.1 | -4.0 | 13.5 | 1.0   | C34 H44 N P Na     |
|          | 520.3109   | -2.1 | -4.0 | 7.5  | 8.0   | C29 H48 N O3 P2    |
|          | 520.3066   | 2.2  | 4.2  | 13.5 | 8.7   | C27 H39 N9 P       |
|          | 520.3111   | -2.3 | -4.4 | -0.5 | 37.8  | C19 H47 N5 O9 P    |
|          | 520.3111   | -2.3 | -4.4 | 5.5  | 17.7  | C24 H43 N5 O6 Na   |
|          | 520.3063   | 2.5  | 4.8  | 12.5 | 1.8   | C32 H42 N O5       |
|          | 520.3059   | 2.9  | 5.6  | 5.5  | 23.9  | C23 H45 N7 O P2 Na |

Supplementary Figure 4. HRMS of L1.

Parameter Value  
Title zhikun-3-L1AuCl-4  
Solvent cdcl3  
Spectrometer Frequency 599.64

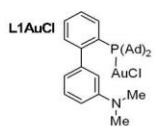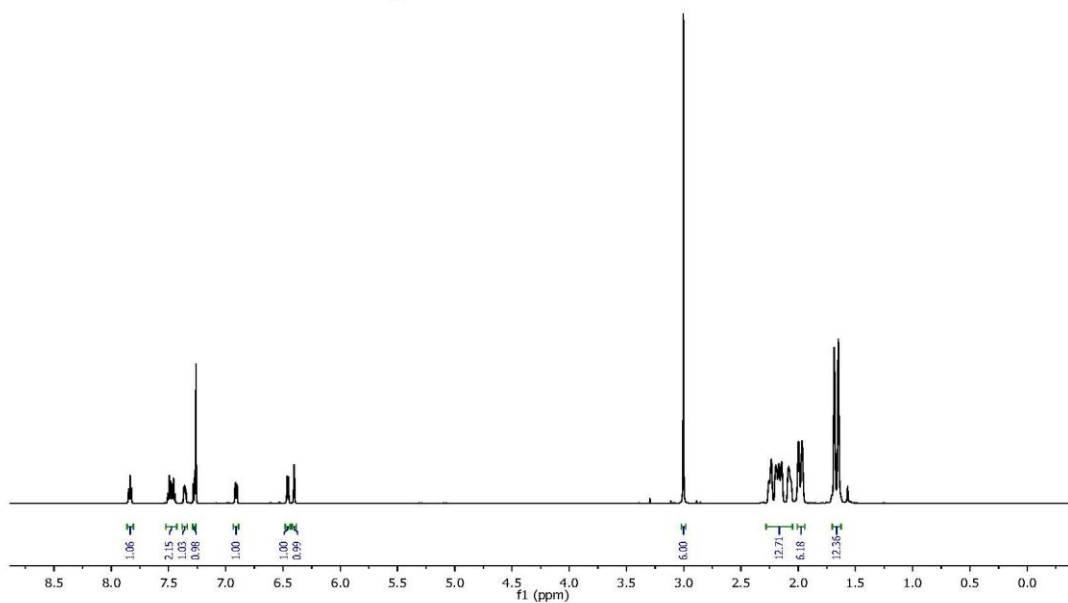

Supplementary Figure 5.  $^1\text{H}$  NMR spectrum of L1AuCl.

Parameter Value  
Title wy28-L1AuCl-C13  
Solvent CDCl3  
Spectrometer Frequency 125.70  
Nucleus 13C

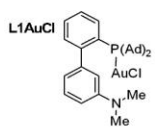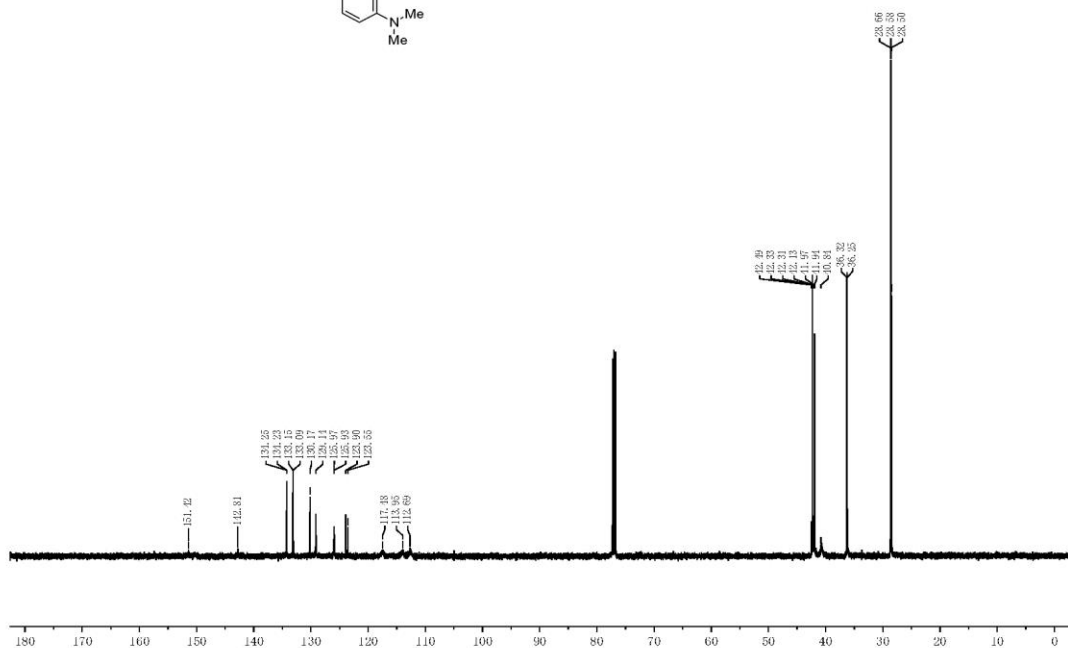

Supplementary Figure 6.  $^{13}\text{C}$  NMR spectrum of L1AuCl.

| Parameter              | Value             |
|------------------------|-------------------|
| Title                  | wyz8-L1AuCl-P31   |
| Solvent                | cdCl <sub>3</sub> |
| Spectrometer Frequency | 161.90            |
| Nucleus                | <sup>31</sup> P   |

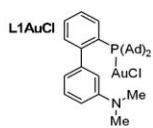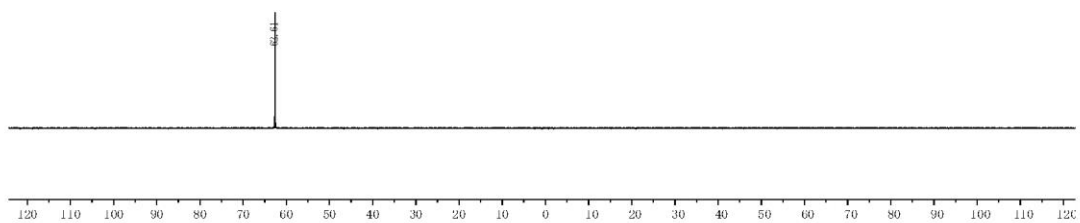

**Supplementary Figure 7. <sup>31</sup>P NMR spectrum of L1AuCl.**

Single Mass Analysis

Tolerance = 3.0 mDa / DBE: min = -1.5, max = 50.0

Selected filters: None

Monoisotopic Mass, Even Electron Ions

3887 formula(e) evaluated with 10 results within limits (all results (up to 1000) for each mass)

Elements Used:

C: 0-100 H: 0-100 N: 0-10 Na: 0-1 P: 0-2 Cl: 0-2 Au: 0-4

Wang/Zhang, wylL1AuCl, mw 729; ESI+

ZHA102213MI 1277 (23.685) Cn (Cen,4, 60.00, Ar); Sm (SG, 4x3.00); Cm (1176:1294)

UCSB CHEM BIOCHEM QTOF2

TOF MS ES+

2.78e3

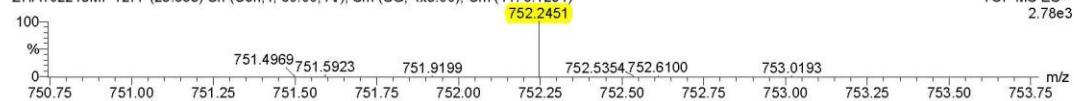

Minimum: -1.5  
Maximum: 50.0

| Mass     | Calc. Mass | mDa  | PPM  | DBE  | i-FIT     | Formula              |
|----------|------------|------|------|------|-----------|----------------------|
| 752.2451 | 752.2453   | -0.2 | -0.3 | 24.5 | 5547413.0 | C43 H42 N5 Na P Cl2  |
|          | 752.2445   | 0.6  | 0.8  | 18.5 | 5547409.5 | C35 H39 N3 Na P Au   |
|          | 752.2458   | -0.7 | -0.9 | 32.5 | 5547412.0 | C46 H36 N7 P Cl      |
|          | 752.2440   | 1.1  | 1.5  | 37.5 | 5547411.5 | C47 H31 N9 P         |
|          | 752.2463   | -1.2 | -1.6 | 13.5 | 5547411.0 | C34 H44 N Na P Cl Au |
|          | 752.2438   | 1.3  | 1.7  | 8.5  | 5547412.5 | C26 H44 N7 P Cl2 Au  |
|          | 752.2434   | 1.7  | 2.3  | 29.5 | 5547412.0 | C44 H37 N7 Na P Cl   |
|          | 752.2469   | -1.8 | -2.4 | 21.5 | 5547410.0 | C37 H38 N3 P Au      |
|          | 752.2431   | 2.0  | 2.7  | 2.5  | 5547401.0 | C18 H41 N5 P Au2     |
|          | 752.2477   | -2.6 | -3.5 | 27.5 | 5547413.0 | C45 H41 N5 P Cl2     |

Supplementary Figure 8. HRMS of L1AuCl.



Parameter Value  
Title zhkun-3-L2  
Solvent cdcl3  
Spectrometer Frequency 599.64

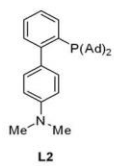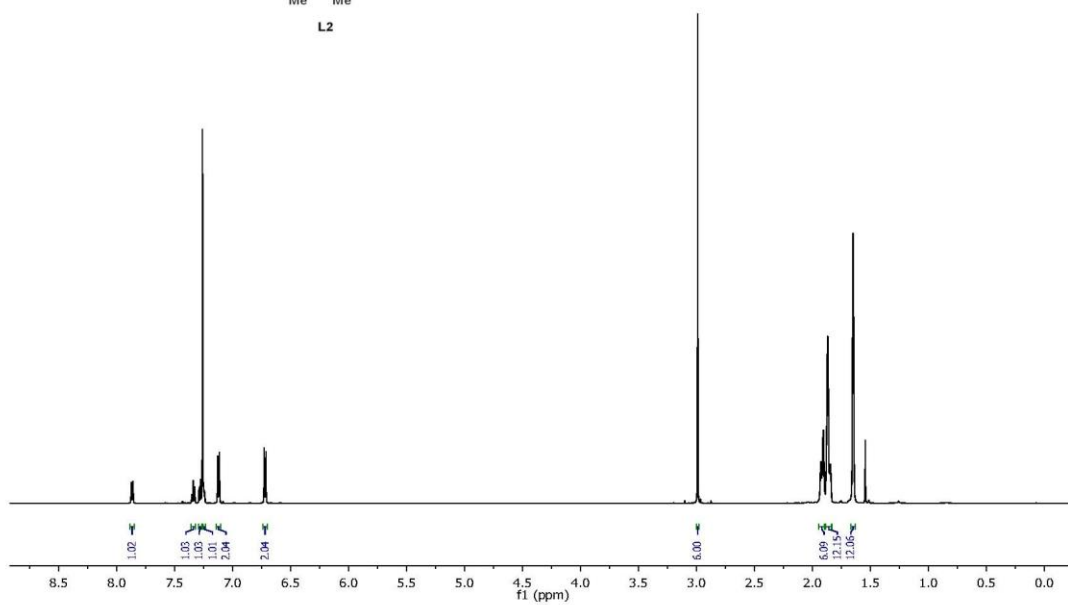

Supplementary Figure 9. <sup>1</sup>H NMR spectrum of L2.

Parameter Value  
Title wyz7-296-10-C13  
Solvent CDCl3  
Spectrometer Frequency 125.70  
Nucleus 13C

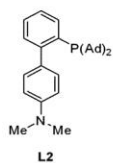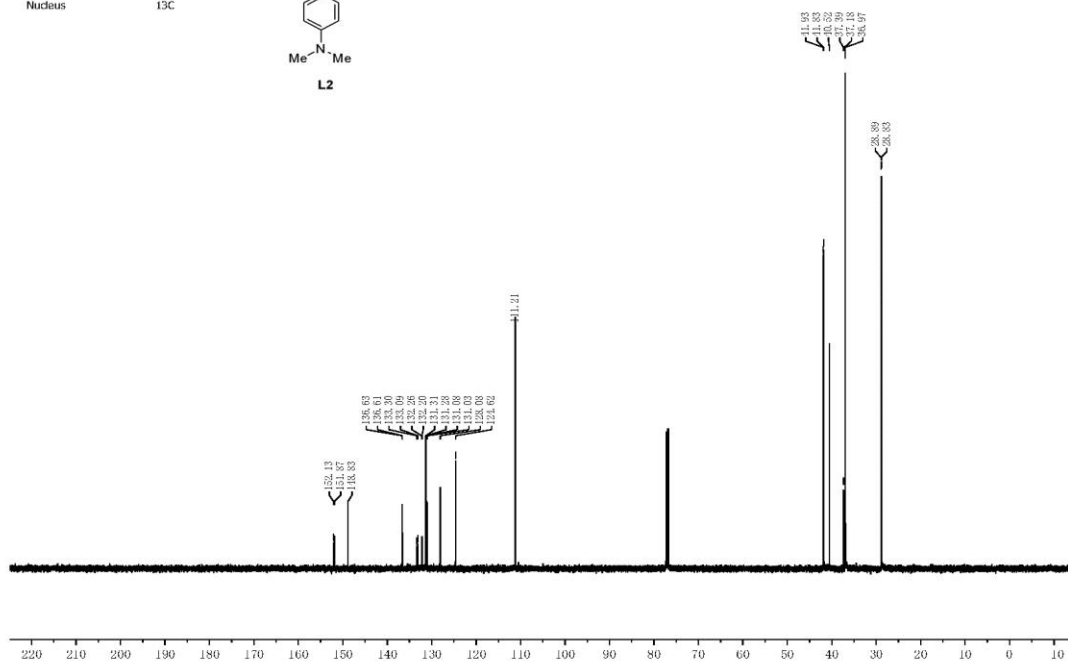

Supplementary Figure 10. <sup>13</sup>C NMR spectrum of L2.

Parameter Value  
Title wyz7-296-10-P31  
Solvent cdcCl3  
Spectrometer Frequency 161.90  
Nucleus 31P

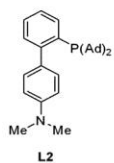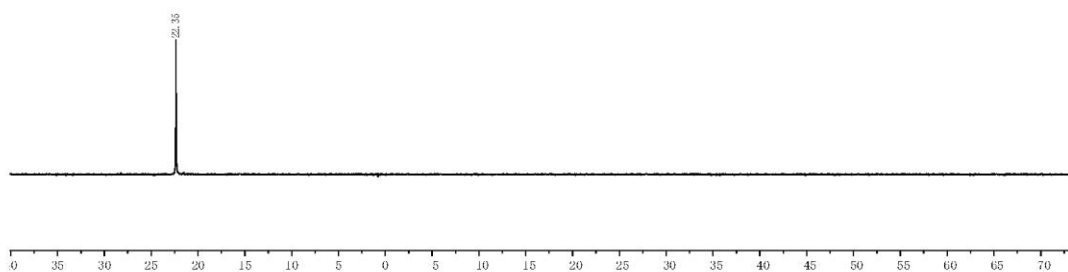

Supplementary Figure 11.  $^{31}\text{P}$  NMR spectrum of L2.

Single Mass Analysis

Tolerance = 3.0 mDa / DBE: min = -1.5, max = 50.0

Selected filters: None

Monoisotopic Mass, Even Electron Ions

3654 formula(e) evaluated with 14 results within limits (all results (up to 1000) for each mass)

Elements Used:

C: 0-100 H: 0-100 N: 0-10 O: 0-10 Na: 0-1 P: 0-2

Wang/Zhang, wylzL2, mw 497; ESI+

ZHA102213MB 466 (8.838) Cn (Cen,4, 60.00, Ar); Sm (SG, 4x3.00); Cm (435;483)

UCSB CHEM BIOCHEM QTOF2  
TOF MS ES+  
557

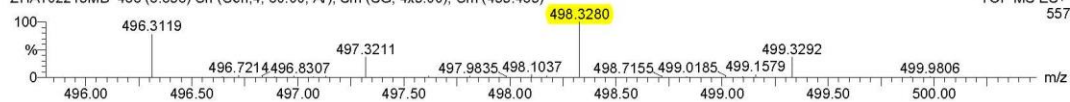

Minimum: -1.5  
Maximum: 3.0 10.0 50.0

| Mass     | Calc. Mass | mDa  | PPM  | DBE  | i-FIT     | Formula            |
|----------|------------|------|------|------|-----------|--------------------|
| 498.3280 | 498.3281   | -0.1 | -0.2 | 7.5  | 2773187.3 | C23 H41 N9 O2 Na   |
|          | 498.3281   | -0.1 | -0.2 | 1.5  | 2773161.8 | C18 H45 N9 O5 P    |
|          | 498.3278   | 0.2  | 0.4  | 0.5  | 2773224.5 | C23 H48 N O10      |
|          | 498.3290   | -1.0 | -2.0 | 13.5 | 2773258.5 | C34 H45 N P        |
|          | 498.3292   | -1.2 | -2.4 | 5.5  | 2773215.8 | C24 H44 N5 O6      |
|          | 498.3268   | 1.2  | 2.4  | 2.5  | 2773197.0 | C22 H45 N5 O6 Na   |
|          | 498.3266   | 1.4  | 2.8  | 4.5  | 2773210.8 | C27 H50 N O3 P2    |
|          | 498.3266   | 1.4  | 2.8  | 10.5 | 2773240.5 | C32 H46 N Na P     |
|          | 498.3297   | -1.7 | -3.4 | 2.5  | 2773167.3 | C21 H46 N7 O3 Na P |
|          | 498.3257   | 2.3  | 4.6  | -1.5 | 2773142.8 | C16 H46 N9 O5 Na P |
|          | 498.3305   | -2.5 | -5.0 | 10.5 | 2773209.0 | C25 H40 N9 O2      |
|          | 498.3308   | -2.8 | -5.6 | 0.5  | 2773199.3 | C22 H49 N3 O7 P    |
|          | 498.3308   | -2.8 | -5.6 | 6.5  | 2773224.0 | C27 H45 N3 O4 Na   |
|          | 498.3251   | 2.9  | 5.8  | 1.5  | 2773192.0 | C19 H44 N7 O8      |

Supplementary Figure 12. HRMS of L2.

| Parameter                | Value           |
|--------------------------|-----------------|
| 1 Title                  | zhixun-3-L2AuCl |
| 2 Solvent                | CDCl3           |
| 3 Spectrometer Frequency | 499.86          |

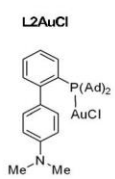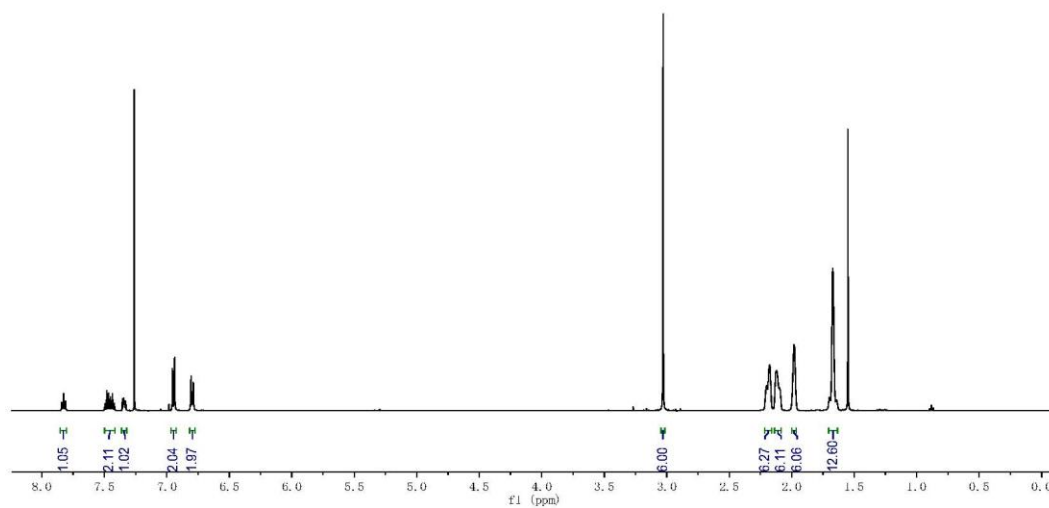

Supplementary Figure 13.  $^1\text{H}$  NMR spectrum of L2AuCl.



| Parameter              | Value             |
|------------------------|-------------------|
| Title                  | wyzS-L2AuCl-P31   |
| Solvent                | cdCl <sub>2</sub> |
| Spectrometer Frequency | 161.90            |
| Nucleus                | <sup>31</sup> P   |

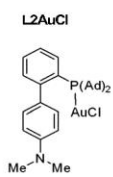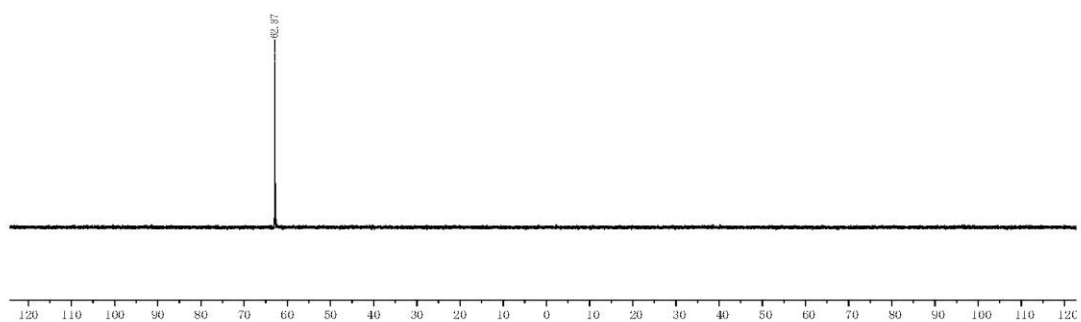

**Supplementary Figure 15. <sup>31</sup>P NMR spectrum of L2AuCl.**

Single Mass Analysis

Tolerance = 3.0 mDa / DBE: min = -1.5, max = 50.0

Selected filters: None

Monoisotopic Mass, Even Electron Ions

3887 formula(e) evaluated with 11 results within limits (all results (up to 1000) for each mass)

Elements Used:

C: 0-100 H: 0-100 N: 0-10 Na: 0-1 P: 0-2 Cl: 0-2 Au: 0-4

Wang/Zhang, wyl2AuCl, mw 729; ESI+

ZHA102213MJ 260 (4.937) Cn (Cen.4, 60.00, Ar); Sm (SG, 4x3.00); Cm (252.306)

UCSB CHEM BIOCHEM QTOF2

TOF MS ES+

3.39e3

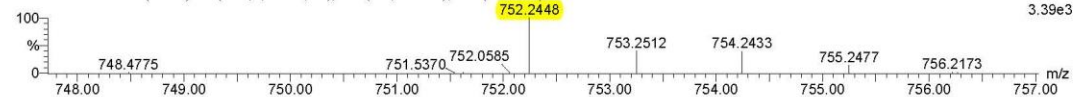

Minimum: -1.5  
Maximum: 3.0 10.0 50.0

| Mass     | Calc. Mass | mDa  | PPM  | DBE  | i-FIT | Formula              |
|----------|------------|------|------|------|-------|----------------------|
| 752.2448 | 752.2445   | 0.3  | 0.4  | 18.5 | 423.1 | C35 H39 N3 Na P Au   |
|          | 752.2453   | -0.5 | -0.7 | 24.5 | 239.3 | C43 H42 N5 Na P Cl2  |
|          | 752.2440   | 0.8  | 1.1  | 37.5 | 346.4 | C47 H31 N9 P         |
|          | 752.2458   | -1.0 | -1.3 | 32.5 | 52.4  | C46 H36 N7 P Cl      |
|          | 752.2438   | 1.0  | 1.3  | 8.5  | 255.1 | C26 H44 N7 P Cl2 Au  |
|          | 752.2434   | 1.4  | 1.9  | 29.5 | 39.0  | C14 H37 N7 Na P Cl   |
|          | 752.2463   | -1.5 | -2.0 | 13.5 | 0.3   | C34 H44 N Na P Cl Au |
|          | 752.2431   | 1.7  | 2.3  | 2.5  | 697.6 | C18 H41 N5 P Au2     |
|          | 752.2469   | -2.1 | -2.8 | 21.5 | 405.0 | C37 H38 N3 P Au      |
|          | 752.2420   | 2.8  | 3.7  | 13.5 | 11.9  | C27 H39 N9 P Cl Au   |
|          | 752.2477   | -2.9 | -3.9 | 27.5 | 247.0 | C45 H41 N5 P Cl2     |

Supplementary Figure 16. HRMS of L2AuCl.



Parameter Value  
Title zhkun-3-13-1  
Solvent cdcl3  
Spectrometer Frequency 599.64

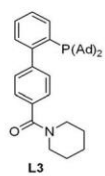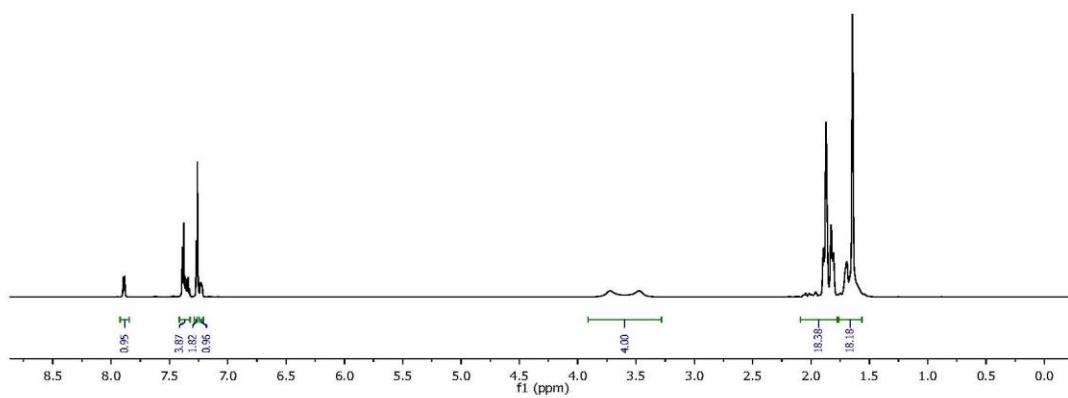

Supplementary Figure 17. <sup>1</sup>H NMR spectrum of L3.

Parameter Value  
Title wyz7-296-9-C13  
Solvent CDCl3  
Spectrometer Frequency 125.70  
Nucleus 13C

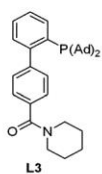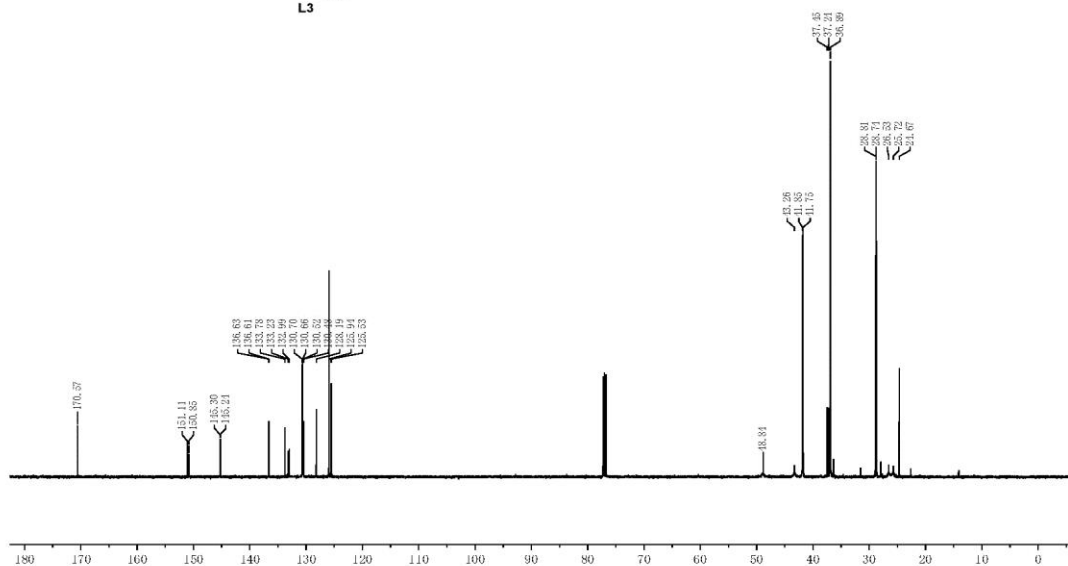

Supplementary Figure 18.  $^{13}\text{C}$  NMR spectrum of L3.

| Parameter              | Value                |
|------------------------|----------------------|
| Title                  | wyz7-296-9-P31-H3PO4 |
| Solvent                | cdcl3                |
| Spectrometer Frequency | 161.90               |
| Nucleus                | 31P                  |

C1CCN(C1)C(=O)c2ccc(cc2)C3=CC=C(C=C3)P(=O)(O)O  
L3

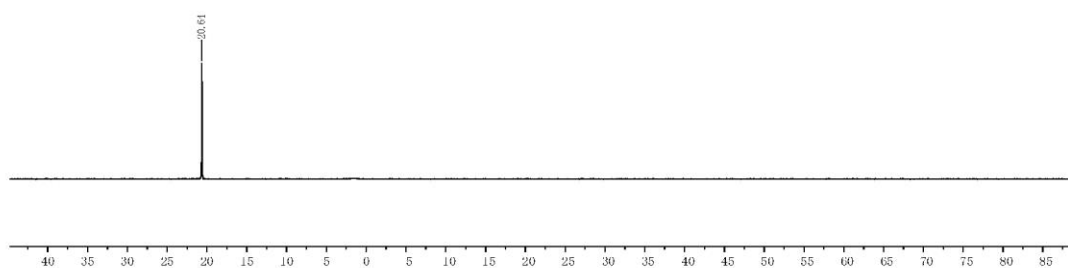

**Supplementary Figure 19. <sup>31</sup>P NMR spectrum of L3.**

## Single Mass Analysis

Tolerance = 3.0 mDa / DBE: min = -1.5, max = 50.0

Selected filters: None

Monoisotopic Mass, Even Electron Ions

4441 formula(e) evaluated with 18 results within limits (all results (up to 1000) for each mass)

Elements Used:

C: 0-100 H: 0-100 N: 0-10 O: 0-10 Na: 0-1 P: 0-2

Wang/Zhang, wylzL3, mw 565; ESI+

ZHA102213MC 453 (8.406) Cn (Cen,4, 60.00, Ar); Sm (SG, 4x3.00); Cm (436-519)

UCSB CHEM BIOCHEM QTOF2  
TOF MS ES+  
1.25e4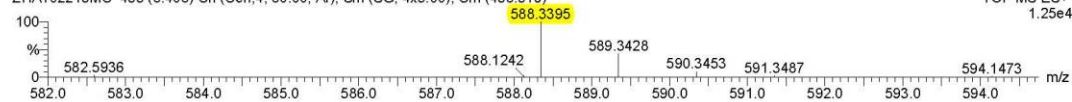

Minimum: -1.5  
Maximum: 50.0

| Mass     | Calc. Mass | mDa  | PPM  | DBE  | i-FIT | Formula             |
|----------|------------|------|------|------|-------|---------------------|
| 588.3395 | 588.3395   | 0.0  | 0.0  | 18.5 | 12.5  | C40 H47 N O P       |
|          | 588.3397   | -0.2 | -0.3 | 10.5 | 57.5  | C30 H46 N5 O7       |
|          | 588.3390   | 0.5  | 0.8  | 2.5  | 203.9 | C26 H52 N3 O8 Na P  |
|          | 588.3387   | 0.8  | 1.4  | 12.5 | 74.7  | C29 H43 N9 O3 Na    |
|          | 588.3403   | -0.8 | -1.4 | 1.5  | 352.4 | C22 H52 N7 O7 P2    |
|          | 588.3387   | 0.8  | 1.4  | 6.5  | 227.9 | C24 H47 N9 O6 P     |
|          | 588.3403   | -0.8 | -1.4 | 7.5  | 149.2 | C27 H48 N7 O4 Na P  |
|          | 588.3385   | 1.0  | 1.7  | 14.5 | 20.1  | C34 H48 N5 P2       |
|          | 588.3411   | -1.6 | -2.7 | 15.5 | 32.0  | C31 H42 N9 O3       |
|          | 588.3379   | 1.6  | 2.7  | -1.5 | 478.0 | C20 H53 N7 O7 Na P2 |
|          | 588.3379   | 1.6  | 2.7  | 23.5 | 46.9  | C42 H42 N3          |
|          | 588.3413   | -1.8 | -3.1 | 11.5 | 22.7  | C33 H47 N3 O5 Na    |
|          | 588.3414   | -1.9 | -3.2 | 5.5  | 126.1 | C28 H51 N3 O8 P     |
|          | 588.3374   | 2.1  | 3.6  | 1.5  | 298.8 | C23 H51 N5 O10 P    |
|          | 588.3373   | 2.2  | 3.7  | 7.5  | 113.4 | C28 H47 N5 O7 Na    |
|          | 588.3372   | 2.3  | 3.9  | 9.5  | 36.7  | C33 H52 N O4 P2     |
|          | 588.3371   | 2.4  | 4.1  | 15.5 | 3.0   | C38 H48 N O Na P    |
|          | 588.3420   | -2.5 | -4.2 | 2.5  | 251.9 | C25 H53 N5 O5 Na P2 |

Supplementary Figure 20. HRMS of L3.

Parameter Value  
Title zhkum-3-L3AuCl  
Solvent cdcl3  
Spectrometer Frequency 599.64

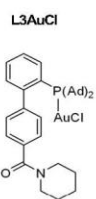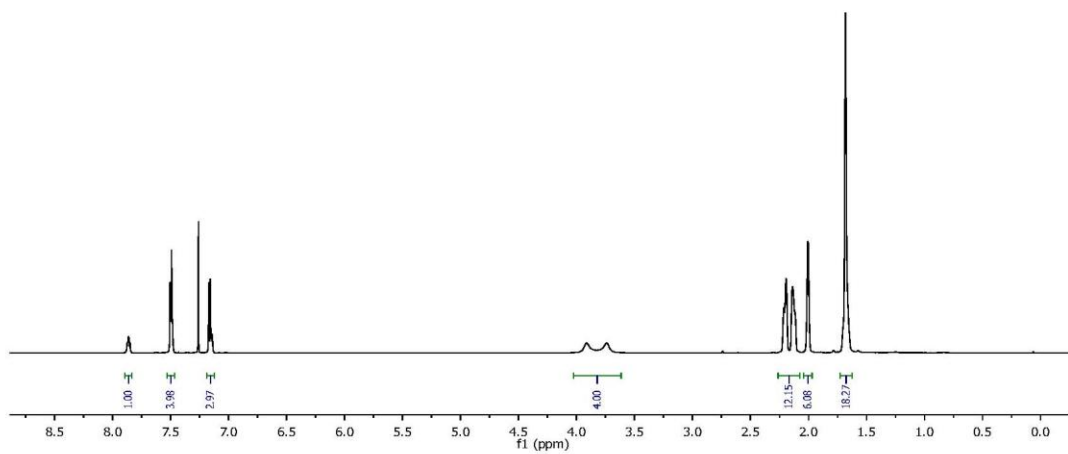

Supplementary Figure 21. <sup>1</sup>H NMR spectrum of L3AuCl.



| Parameter              | Value             |
|------------------------|-------------------|
| Title                  | wyz8-L3AuCl-P31   |
| Solvent                | cdCl <sub>3</sub> |
| Spectrometer Frequency | 161.90            |
| Nucleus                | <sup>31</sup> P   |

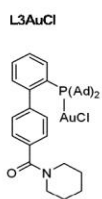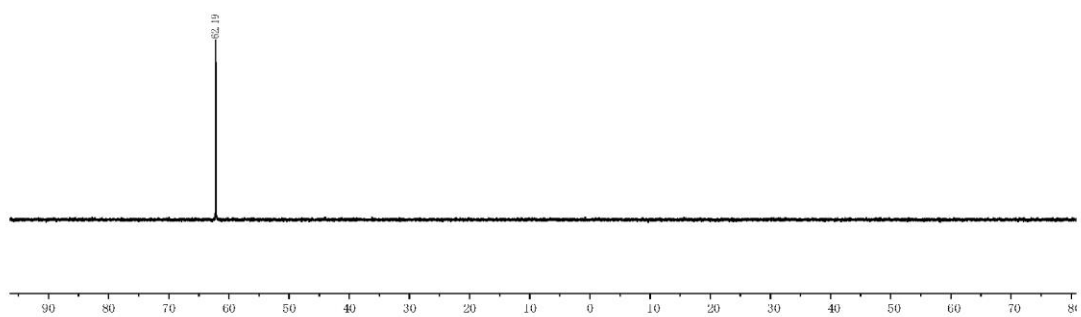

**Supplementary Figure 23.** <sup>31</sup>P NMR spectrum of L3AuCl.

Single Mass Analysis

Tolerance = 3.0 mDa / DBE: min = -1.5, max = 50.0

Selected filters: None

Monoisotopic Mass, Even Electron Ions

19911 formula(e) evaluated with 62 results within limits (all results (up to 1000) for each mass)

Elements Used:

C: 0-100 H: 0-100 N: 0-10 O: 0-10 Na: 0-1 P: 0-1 Cl: 0-1 Au: 0-4

Wang/Zhang, wylL3AuCl, mw 797; ESI+

ZHA102213MK 89 (1.688) Cn (Cen,4, 60.00, Ar); Sm (SG, 4x3.00); Cm (84:102)

UCSB CHEM BIOCHEM QTOF2

TOF MS ES+

768

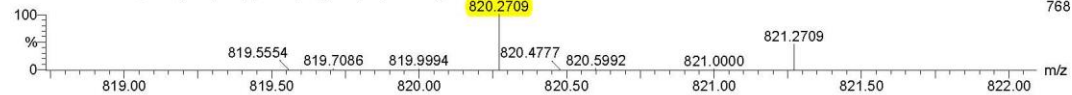

Minimum: -1.5  
Maximum: 50.0

| Mass     | Calc. Mass | mDa  | PPM  | DBE  | i-FIT     | Formula                   |
|----------|------------|------|------|------|-----------|---------------------------|
| 820.2709 | 820.2709   | 0.0  | 0.0  | 12.5 | 2773436.0 | C29 H42 N7 O7 Na Au       |
|          | 820.2709   | 0.0  | 0.0  | 20.5 | 2773564.3 | C40 H43 N3 Na Cl Au       |
|          | 820.2709   | 0.0  | 0.0  | 14.5 | 2773564.3 | C35 H47 N3 O3 P Cl Au     |
|          | 820.2709   | 0.0  | 0.0  | 6.5  | 2773410.8 | C24 H46 N7 O10 P Au       |
|          | 820.2707   | 0.2  | 0.2  | 20.5 | 2773475.0 | C39 H43 N3 O Na P Au      |
|          | 820.2711   | -0.2 | -0.2 | 6.5  | 2773564.5 | C25 H46 N7 O9 Cl Au       |
|          | 820.2707   | 0.2  | 0.2  | 29.5 | 2773565.3 | C49 H44 N3 O5 P Cl        |
|          | 820.2707   | 0.2  | 0.2  | 35.5 | 2773565.5 | C54 H40 N3 O2 Na Cl       |
|          | 820.2707   | 0.2  | 0.2  | 27.5 | 2773515.8 | C43 H39 N7 O9 Na          |
|          | 820.2711   | -0.2 | -0.2 | -0.5 | 2773563.8 | C21 H50 N3 O P Cl Au2     |
|          | 820.2705   | 0.4  | 0.5  | 35.5 | 2773531.0 | C53 H40 N3 O3 Na P        |
|          | 820.2713   | -0.4 | -0.5 | 43.5 | 2773538.5 | C57 H34 N5 O2             |
|          | 820.2704   | 0.5  | 0.6  | 39.5 | 2773565.3 | C52 H35 N9 Cl             |
|          | 820.2704   | 0.5  | 0.6  | -1.5 | 2773564.5 | C21 H52 N5 O10 Na P Cl Au |
|          | 820.2703   | 0.6  | 0.7  | 8.5  | 2773365.3 | C28 H44 N O2 Au2          |
|          | 820.2715   | -0.6 | -0.7 | 28.5 | 2773497.5 | C43 H37 N5 Au             |
|          | 820.2715   | -0.6 | -0.7 | 18.5 | 2773564.8 | C36 H45 N9 O8 Na P Cl     |
|          | 820.2702   | 0.7  | 0.9  | 39.5 | 2773529.3 | C51 H35 N9 O P            |
|          | 820.2717   | -0.8 | -1.0 | 3.5  | 2773564.3 | C22 H48 N9 O6 Na P Cl Au  |
|          | 820.2701   | 0.8  | 1.0  | 23.5 | 2773495.8 | C42 H41 N O4 Au           |
|          | 820.2699   | 1.0  | 1.2  | 38.5 | 2773537.5 | C56 H38 N O6              |
|          | 820.2721   | -1.2 | -1.5 | 34.5 | 2773565.3 | C50 H40 N7 O P Cl         |
|          | 820.2696   | 1.3  | 1.6  | 31.5 | 2773565.0 | C48 H41 N7 O Na P Cl      |
|          | 820.2695   | 1.4  | 1.7  | 4.5  | 2773563.8 | C23 H45 N5 Cl Au2         |
|          | 820.2723   | -1.4 | -1.7 | 30.5 | 2773565.3 | C52 H45 N O3 Na P Cl      |
|          | 820.2724   | -1.5 | -1.8 | 22.5 | 2773509.0 | C41 H44 N5 O10 Na P       |
|          | 820.2725   | -1.6 | -2.0 | 15.5 | 2773564.3 | C38 H48 N O Na P Cl Au    |
|          | 820.2725   | -1.6 | -2.0 | 22.5 | 2773565.0 | C42 H44 N5 O9 Na Cl       |
|          | 820.2693   | 1.6  | 2.0  | 19.5 | 2773564.3 | C37 H42 N5 O2 Cl Au       |
|          | 820.2693   | 1.6  | 2.0  | 11.5 | 2773427.5 | C26 H41 N9 O9 Au          |
|          | 820.2693   | 1.6  | 2.0  | 4.5  | 2773278.0 | C22 H45 N5 O P Au2        |
|          | 820.2726   | -1.7 | -2.1 | 7.5  | 2773418.8 | C27 H47 N5 O8 Na P Au     |
|          | 820.2727   | -1.8 | -2.2 | 7.5  | 2773564.3 | C28 H47 N5 O7 Na Cl Au    |
|          | 820.2691   | 1.8  | 2.2  | 34.5 | 2773565.5 | C51 H39 N5 O4 Cl          |
|          | 820.2691   | 1.8  | 2.2  | 19.5 | 2773466.5 | C36 H42 N5 O3 P Au        |
|          | 820.2691   | 1.8  | 2.2  | 25.5 | 2773487.5 | C41 H38 N5 Na Au          |
|          | 820.2728   | -1.9 | -2.3 | 1.5  | 2773564.5 | C23 H51 N5 O10 P Cl Au    |
|          | 820.2689   | 2.0  | 2.4  | 34.5 | 2773527.8 | C50 H39 N5 O5 P           |
|          | 820.2729   | -2.0 | -2.4 | 44.5 | 2773541.0 | C60 H35 N3 Na             |
|          | 820.2729   | -2.0 | -2.4 | 38.5 | 2773534.8 | C55 H39 N3 O3 P           |
|          | 820.2688   | 2.1  | 2.6  | 40.5 | 2773535.3 | C55 H35 N5 O2 Na          |
|          | 820.2731   | -2.2 | -2.7 | 30.5 | 2773521.5 | C45 H38 N7 O9             |
|          | 820.2731   | -2.2 | -2.7 | 23.5 | 2773486.8 | C41 H42 N3 O P Au         |
|          | 820.2687   | 2.2  | 2.7  | 3.5  | 2773564.5 | C23 H47 N7 O9 Na Cl Au    |
|          | 820.2731   | -2.2 | -2.7 | 38.5 | 2773565.8 | C56 H39 N3 O2 Cl          |
|          | 820.2685   | 2.4  | 2.9  | 3.5  | 2773391.5 | C22 H47 N7 O10 Na P Au    |
|          | 820.2733   | -2.4 | -2.9 | 23.5 | 2773564.5 | C42 H42 N3 Cl Au          |
|          | 820.2685   | 2.4  | 2.9  | 11.5 | 2773564.0 | C33 H48 N3 O3 Na P Cl Au  |
|          | 820.2733   | -2.4 | -2.9 | 15.5 | 2773452.0 | C31 H41 N7 O7 Au          |
|          | 820.2735   | -2.6 | -3.2 | 0.5  | 2773268.8 | C17 H44 N7 O5 Au2         |
|          | 820.2683   | 2.6  | 3.2  | 26.5 | 2773565.0 | C47 H45 N3 O5 Na P Cl     |
|          | 820.2736   | -2.7 | -3.3 | 11.5 | 2773461.0 | C33 H46 N O9 Na Au        |
|          | 820.2682   | 2.7  | 3.3  | 15.5 | 2773564.0 | C31 H43 N9 O P Cl Au      |



Single Mass Analysis

Tolerance = 3.0 mDa / DBE: min = -1.5, max = 50.0

Selected filters: None

Monoisotopic Mass, Even Electron Ions

19911 formula(e) evaluated with 62 results within limits (all results (up to 1000) for each mass)

Elements Used:

C: 0-100 H: 0-100 N: 0-10 O: 0-10 Na: 0-1 P: 0-1 Cl: 0-1 Au: 0-4

Wang/Zhang, wylL3AuCl, mw 797; ESI+

ZHA102213MK 89 (1.688) Cn (Cen,4, 60.00, Ar); Sm (SG, 4x3.00); Cm (84:102)

UCSB CHEM BIOCHEM QTOF2

TOF MS ES+

768

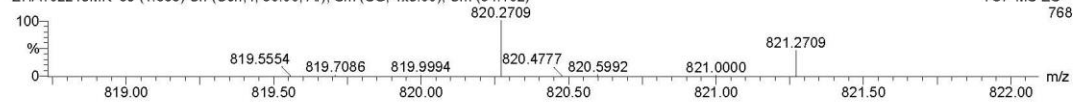

Minimum: -1.5  
Maximum: 50.0

| Mass     | Calc. Mass | mDa  | PPM  | DBE       | i-FIT                 | Formula |
|----------|------------|------|------|-----------|-----------------------|---------|
| 820.2681 | 2.8        | 3.4  | -0.5 | 2773564.0 | C22 H49 N O4 Cl Au2   |         |
| 820.2737 | -2.8       | -3.4 | 27.5 | 2773510.3 | C42 H40 N9 O6 Na P    |         |
| 820.2680 | 2.9        | 3.5  | 36.5 | 2773565.3 | C50 H36 N9 Na Cl      |         |
| 820.2680 | 2.9        | 3.5  | -0.5 | 2773298.8 | C21 H49 N O5 P Au2    |         |
| 820.2680 | 2.9        | 3.5  | 30.5 | 2773565.0 | C45 H40 N9 O3 P Cl    |         |
| 820.2679 | 3.0        | 3.7  | 5.5  | 2773335.8 | C26 H45 N O2 Na Au2   |         |
| 820.2679 | 3.0        | 3.7  | 14.5 | 2773564.5 | C36 H46 N O6 Cl Au    |         |
| 820.2739 | -3.0       | -3.7 | 27.5 | 2773565.0 | C43 H40 N9 O5 Na Cl   |         |
| 820.2739 | -3.0       | -3.7 | 12.5 | 2773414.5 | C28 H43 N9 O4 Na P Au |         |

Supplementary Figure 24. HRMS of L3AuCl.

| Parameter                | Value       |
|--------------------------|-------------|
| 1 Title                  | zhixun-3-14 |
| 2 Solvent                | CDCl3       |
| 3 Spectrometer Frequency | 499.86      |

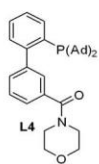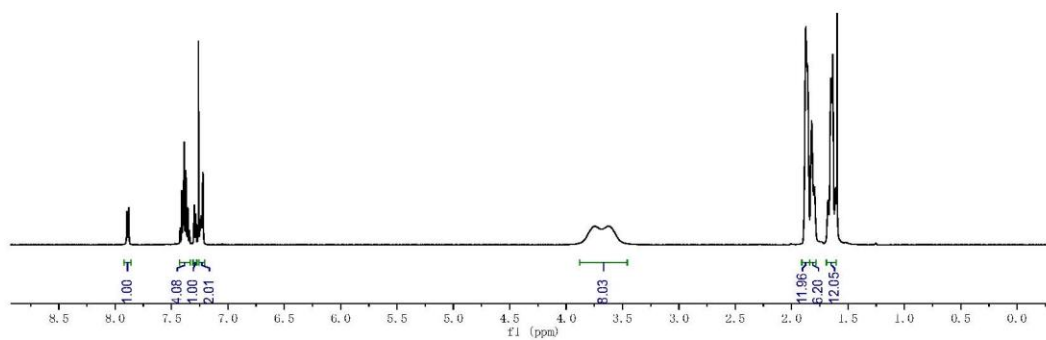

Supplementary Figure 25. <sup>1</sup>H NMR spectrum of L4.

Parameter Value  
Title wyz7-296-4-C13  
Solvent CDCl3  
Spectrometer Frequency 125.70  
Nucleus 13C

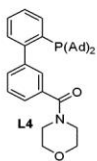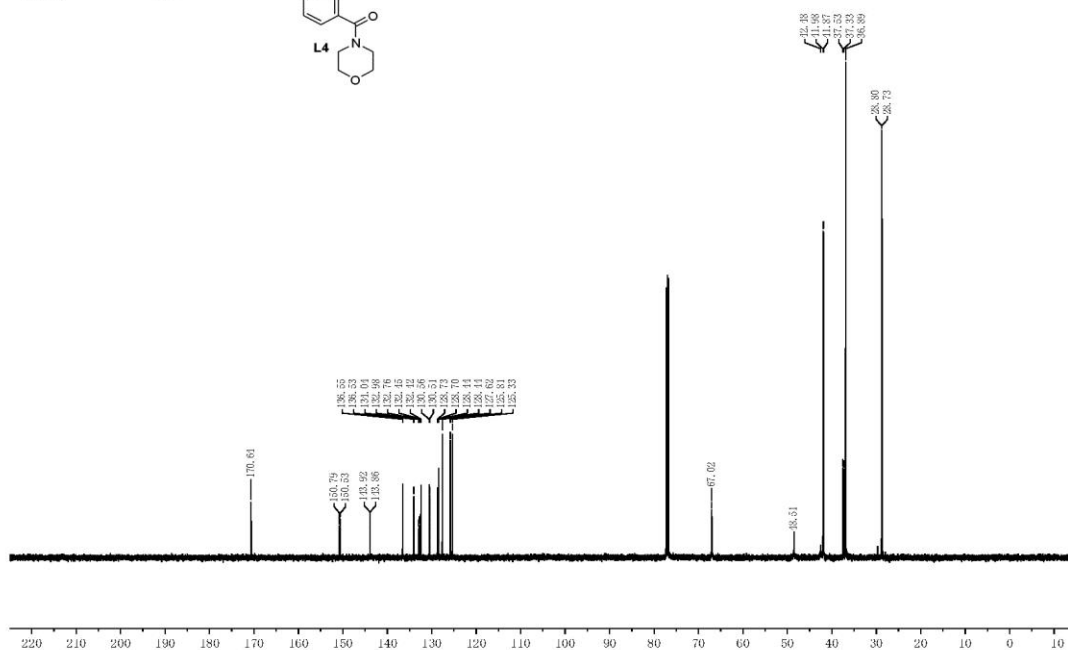

Supplementary Figure 26.  $^{13}\text{C}$  NMR spectrum of L4.

| Parameter              | Value             |
|------------------------|-------------------|
| Title                  | wyz7-296-4-p31    |
| Solvent                | cdCl <sub>3</sub> |
| Spectrometer Frequency | 161.90            |
| Nucleus                | <sup>31</sup> P   |

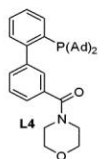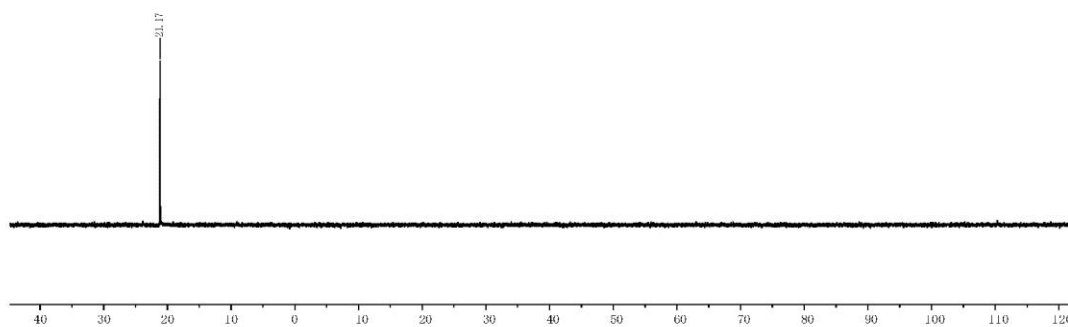

Supplementary Figure 27. <sup>31</sup>P NMR spectrum of L4.

Single Mass Analysis

Tolerance = 3.0 mDa / DBE: min = -1.5, max = 50.0

Selected filters: None

Monoisotopic Mass, Even Electron Ions

4463 formula(e) evaluated with 20 results within limits (all results (up to 1000) for each mass)

Elements Used:

C: 0-100 H: 0-100 N: 0-10 O: 0-10 Na: 0-1 P: 0-2

Wang/Zhang, wylL4, mw 567; ESI+

ZHA102213MD 431 (7.997) Cn (Cen,4, 60.00, Ar); Sm (SG, 4x3.00); Cm (387;439)

UCSB CHEM BIOCHEM QTOF2  
TOF MS ES+  
2.01e3

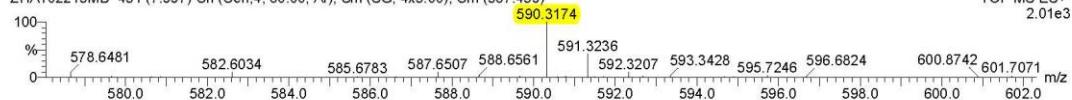

Minimum: -1.5  
Maximum: 3.0 10.0 50.0

| Mass     | Calc. Mass | mDa  | PPM  | DBE  | i-FIT | Formula             |
|----------|------------|------|------|------|-------|---------------------|
| 590.3174 | 590.3172   | 0.2  | 0.3  | -1.5 | 83.5  | C19 H51 N7 O8 Na P2 |
|          | 590.3171   | 0.3  | 0.5  | 23.5 | 6.1   | C41 H40 N3 O        |
|          | 590.3178   | -0.4 | -0.7 | 14.5 | 4.0   | C33 H46 N5 O P2     |
|          | 590.3179   | -0.5 | -0.8 | 12.5 | 14.2  | C28 H41 N9 O4 Na    |
|          | 590.3180   | -0.6 | -1.0 | 6.5  | 41.0  | C23 H45 N9 O7 P     |
|          | 590.3166   | 0.8  | 1.4  | 7.5  | 21.3  | C27 H45 N5 O8 Na    |
|          | 590.3182   | -0.8 | -1.4 | 2.5  | 37.1  | C25 H50 N3 O9 Na P  |
|          | 590.3164   | 1.0  | 1.7  | 9.5  | 7.4   | C32 H50 N O5 P2     |
|          | 590.3164   | 1.0  | 1.7  | 9.5  | 7.4   | C32 H50 N O5 P2     |
|          | 590.3164   | 1.0  | 1.7  | 9.5  | 7.4   | C32 H50 N O5 P2     |
|          | 590.3164   | 1.0  | 1.7  | 9.5  | 7.4   | C32 H50 N O5 P2     |
|          | 590.3161   | 1.3  | 2.2  | 19.5 | 0.8   | C35 H41 N7 P        |
|          | 590.3188   | -1.4 | -2.4 | 18.5 | 1.3   | C39 H45 N O2 P      |
|          | 590.3190   | -1.6 | -2.7 | 10.5 | 11.5  | C29 H44 N5 O8       |
|          | 590.3156   | 1.8  | 3.0  | 3.5  | 58.6  | C21 H46 N9 O7 Na P  |
|          | 590.3154   | 2.0  | 3.4  | 11.5 | 10.3  | C31 H47 N5 O Na P2  |
|          | 590.3196   | -2.2 | -3.7 | 7.5  | 27.3  | C26 H46 N7 O5 Na P  |
|          | 590.3196   | -2.2 | -3.7 | 1.5  | 62.3  | C21 H50 N7 O8 P2    |
|          | 590.3150   | 2.4  | 4.1  | 6.5  | 34.1  | C24 H44 N7 O10      |
|          | 590.3148   | 2.6  | 4.4  | 14.5 | 1.9   | C34 H45 N3 O4 P     |
|          | 590.3147   | 2.7  | 4.6  | 20.5 | 2.1   | C39 H41 N3 O Na     |
|          | 590.3203   | -2.9 | -4.9 | 15.5 | 6.6   | C30 H40 N9 O4       |

Supplementary Figure 28. HRMS of L4.

Parameter Value  
Title zhixun-3-L4AuCl  
Solvent CDCl3  
Spectrometer Frequency 499.86

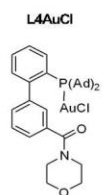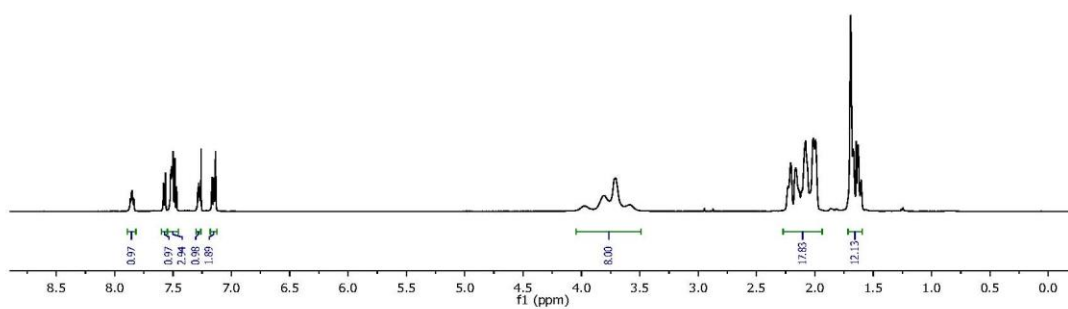

Supplementary Figure 29.  $^1\text{H}$  NMR spectrum of L4AuCl.



| Parameter              | Value             |
|------------------------|-------------------|
| Title                  | wyz8-LSAuCl-P31   |
| Solvent                | cdCl <sub>3</sub> |
| Spectrometer Frequency | 161.90            |
| Nucleus                | <sup>31</sup> P   |

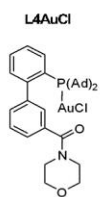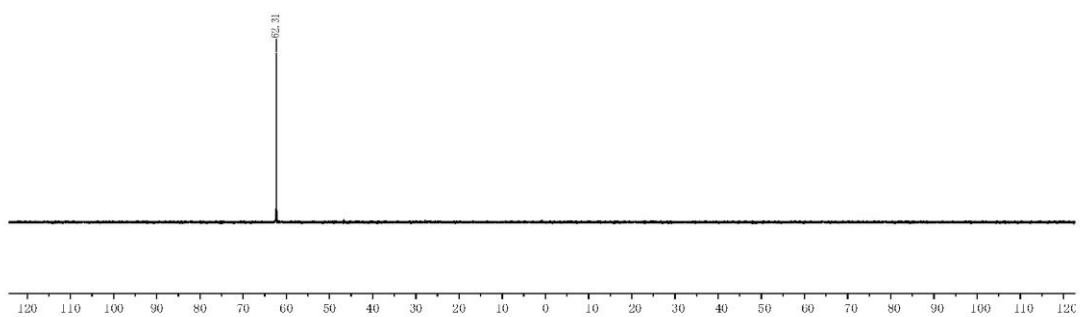

**Supplementary Figure 31. <sup>31</sup>P NMR spectrum of L4AuCl.**



Single Mass Analysis

Tolerance = 3.0 mDa / DBE: min = -1.5, max = 50.0

Selected filters: None

Monoisotopic Mass, Even Electron Ions

20027 formula(e) evaluated with 63 results within limits (all results (up to 1000) for each mass)

Elements Used:

C: 0-100 H: 0-100 N: 0-10 O: 0-10 Na: 0-1 P: 0-1 Cl: 0-1 Au: 0-4

Wang/Zhang, wylL4AuCl, mw 799; ESI+

ZHA102213ML 195 (3.698) Cn (Cen,4, 60.00, Ar); Sm (SG, 4x3.00); Cm (181:229)

UCSB CHEM BIOCHEM QTOF2  
TOF MS ES+  
2.99e3

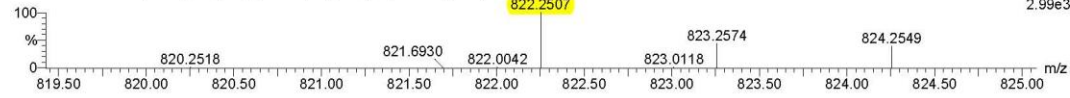

Minimum: -1.5  
 Maximum: 50.0

| Mass     | Calc. Mass | mDa  | PPM  | DBE  | i-FIT | Formula                  |
|----------|------------|------|------|------|-------|--------------------------|
| 822.2507 | 822.2507   | 0.0  | 0.0  | 28.5 | 293.8 | C42 H35 N5 O Au          |
|          | 822.2508   | -0.1 | -0.1 | 18.5 | 4.1   | C35 H43 N9 O9 Na P Cl    |
|          | 822.2505   | 0.2  | 0.2  | 43.5 | 245.7 | C56 H32 N5 O3            |
|          | 822.2504   | 0.3  | 0.4  | -0.5 | 113.1 | C20 H48 N3 O2 P Cl Au2   |
|          | 822.2504   | 0.3  | 0.4  | 6.5  | 50.2  | C24 H44 N7 O10 Cl Au     |
|          | 822.2510   | -0.3 | -0.4 | 3.5  | 73.4  | C21 H46 N9 O7 Na P Cl Au |
|          | 822.2511   | -0.4 | -0.5 | 40.5 | 255.7 | C53 H34 N7 Na P          |
|          | 822.2502   | 0.5  | 0.6  | 12.5 | 392.9 | C28 H40 N7 O8 Na Au      |
|          | 822.2502   | 0.5  | 0.6  | 5.5  | 530.6 | C24 H44 N3 Na P Au2      |
|          | 822.2502   | 0.5  | 0.6  | 14.5 | 5.0   | C34 H45 N3 O4 P Cl Au    |
|          | 822.2513   | -0.6 | -0.7 | 34.5 | 45.1  | C49 H38 N7 O2 P Cl       |
|          | 822.2501   | 0.6  | 0.7  | 20.5 | 2.5   | C39 H41 N3 O Na Cl Au    |
|          | 822.2500   | 0.7  | 0.9  | 20.5 | 324.3 | C38 H41 N3 O2 Na P Au    |
|          | 822.2500   | 0.7  | 0.9  | 29.5 | 35.0  | C48 H42 N3 O6 P Cl       |
|          | 822.2500   | 0.7  | 0.9  | 27.5 | 252.0 | C42 H37 N7 O10 Na        |
|          | 822.2499   | 0.8  | 1.0  | 35.5 | 62.5  | C53 H38 N3 O3 Na Cl      |
|          | 822.2515   | -0.8 | -1.0 | 19.5 | 1.4   | C35 H41 N7 P Cl Au       |
|          | 822.2498   | 0.9  | 1.1  | 35.5 | 246.1 | C52 H38 N3 O4 Na P       |
|          | 822.2516   | -0.9 | -1.1 | 30.5 | 46.8  | C51 H43 N O4 Na P Cl     |
|          | 822.2497   | 1.0  | 1.2  | 39.5 | 60.6  | C51 H33 N9 O Cl          |
|          | 822.2497   | 1.0  | 1.2  | 24.5 | 334.9 | C36 H36 N9 P Au          |
|          | 822.2518   | -1.1 | -1.3 | 15.5 | 1.8   | C37 H46 N O2 Na P Cl Au  |
|          | 822.2518   | -1.1 | -1.3 | 22.5 | 11.6  | C41 H42 N5 O10 Na Cl     |
|          | 822.2496   | 1.1  | 1.3  | 8.5  | 469.5 | C27 H42 N O3 Au2         |
|          | 822.2518   | -1.1 | -1.3 | 7.5  | 426.6 | C26 H45 N5 O9 Na P Au    |
|          | 822.2495   | 1.2  | 1.5  | 39.5 | 252.8 | C50 H33 N9 O2 P          |
|          | 822.2494   | 1.3  | 1.6  | 23.5 | 291.5 | C41 H39 N O5 Au          |
|          | 822.2520   | -1.3 | -1.6 | 0.5  | 82.9  | C23 H49 N Na P Cl Au2    |
|          | 822.2520   | -1.3 | -1.6 | 7.5  | 32.0  | C27 H45 N5 O8 Na Cl Au   |
|          | 822.2521   | -1.4 | -1.7 | 44.5 | 251.8 | C59 H33 N3 O Na          |
|          | 822.2492   | 1.5  | 1.8  | 38.5 | 235.0 | C55 H36 N O7             |
|          | 822.2522   | -1.5 | -1.8 | 38.5 | 243.9 | C54 H37 N3 O4 P          |
|          | 822.2491   | 1.6  | 1.9  | 16.5 | 4.1   | C33 H42 N7 Na P Cl Au    |
|          | 822.2523   | -1.6 | -1.9 | 38.5 | 76.0  | C55 H37 N3 O3 Cl         |
|          | 822.2524   | -1.7 | -2.1 | 23.5 | 307.7 | C40 H40 N3 O2 P Au       |
|          | 822.2524   | -1.7 | -2.1 | 30.5 | 243.3 | C44 H36 N7 O10           |
|          | 822.2489   | 1.8  | 2.2  | 31.5 | 34.2  | C47 H39 N7 O2 Na P Cl    |
|          | 822.2526   | -1.9 | -2.3 | 8.5  | 494.0 | C26 H43 N3 P Au2         |
|          | 822.2526   | -1.9 | -2.3 | 23.5 | 5.7   | C41 H40 N3 O Cl Au       |
|          | 822.2526   | -1.9 | -2.3 | 15.5 | 365.8 | C30 H39 N7 O8 Au         |
|          | 822.2487   | 2.0  | 2.4  | 4.5  | 80.1  | C22 H43 N5 O Cl Au2      |
|          | 822.2486   | 2.1  | 2.6  | 4.5  | 564.3 | C21 H43 N5 O2 P Au2      |
|          | 822.2528   | -2.1 | -2.6 | 0.5  | 633.9 | C16 H42 N7 O6 Au2        |
|          | 822.2485   | 2.2  | 2.7  | 11.5 | 416.9 | C25 H39 N9 O10 Au        |
|          | 822.2529   | -2.2 | -2.7 | 11.5 | 354.1 | C32 H44 N O10 Na Au      |
|          | 822.2529   | -2.2 | -2.7 | 35.5 | 58.3  | C52 H39 N5 Na P Cl       |
|          | 822.2485   | 2.2  | 2.7  | 19.5 | 2.3   | C36 H40 N5 O3 Cl Au      |
|          | 822.2530   | -2.3 | -2.8 | 27.5 | 265.9 | C41 H38 N9 O7 Na P       |
|          | 822.2484   | 2.3  | 2.8  | 19.5 | 337.0 | C35 H40 N5 O4 P Au       |
|          | 822.2531   | -2.4 | -2.9 | 27.5 | 16.7  | C42 H38 N9 O6 Na Cl      |
|          | 822.2483   | 2.4  | 2.9  | 25.5 | 307.8 | C40 H36 N5 O Na Au       |
|          | 822.2483   | 2.4  | 2.9  | 34.5 | 49.3  | C50 H37 N5 O5 Cl         |
|          | 822.2532   | -2.5 | -3.0 | 21.5 | 5.6   | C37 H42 N9 O9 P Cl       |

Single Mass Analysis

Tolerance = 3.0 mDa / DBE: min = -1.5, max = 50.0

Selected filters: None

Monoisotopic Mass, Even Electron Ions

20027 formula(e) evaluated with 63 results within limits (all results (up to 1000) for each mass)

Elements Used:

C: 0-100 H: 0-100 N: 0-10 O: 0-10 Na: 0-1 P: 0-1 Cl: 0-1 Au: 0-4

Wang/Zhang, wylL4AuCl, mw 799; ESI+

ZHA102213ML 195 (3.698) Cn (Cen,4, 60.00, Ar); Sm (SG, 4x3.00); Cm (181:229)

UCSB CHEM BIOCHEM QTOF2

TOF MS ES+

2.99e3

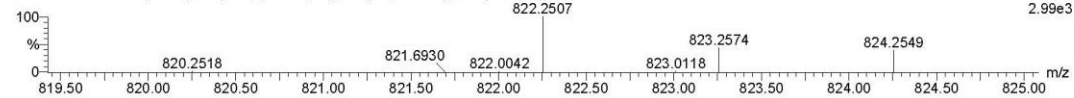

Minimum: -1.5  
Maximum: 50.0

| Mass     | Calc. Mass | mDa  | PPM  | DBE   | i-FIT                    | Formula |
|----------|------------|------|------|-------|--------------------------|---------|
| 822.2532 | -2.5       | -3.0 | 12.5 | 414.9 | C27 H41 N9 O5 Na P Au    |         |
| 822.2481 | 2.6        | 3.2  | 40.5 | 246.6 | C54 H33 N5 O3 Na         |         |
| 822.2481 | 2.6        | 3.2  | 34.5 | 244.3 | C49 H37 N5 O6 P          |         |
| 822.2533 | -2.6       | -3.2 | 12.5 | 18.8  | C28 H41 N9 O4 Na Cl Au   |         |
| 822.2480 | 2.7        | 3.3  | 3.5  | 69.7  | C22 H45 N7 O10 Na Cl Au  |         |
| 822.2534 | -2.7       | -3.3 | 6.5  | 53.4  | C23 H45 N9 O7 P Cl Au    |         |
| 822.2535 | -2.8       | -3.4 | 43.5 | 254.4 | C55 H33 N7 P             |         |
| 822.2478 | 2.9        | 3.5  | 11.5 | 10.6  | C32 H46 N3 O4 Na P Cl Au |         |
| 822.2537 | -3.0       | -3.6 | 2.5  | 52.4  | C25 H50 N3 O9 Na P Cl Au |         |
| 822.2477 | 3.0        | 3.6  | 0.5  | 147.0 | C16 H44 N9 P Cl Au2      |         |

Supplementary Figure 32. HRMS of L4AuCl.

| Parameter                | Value             |
|--------------------------|-------------------|
| 1 Title                  | zhixun-3-1.5      |
| 2 Solvent                | CDCl <sub>3</sub> |
| 3 Spectrometer Frequency | 499.86            |

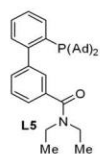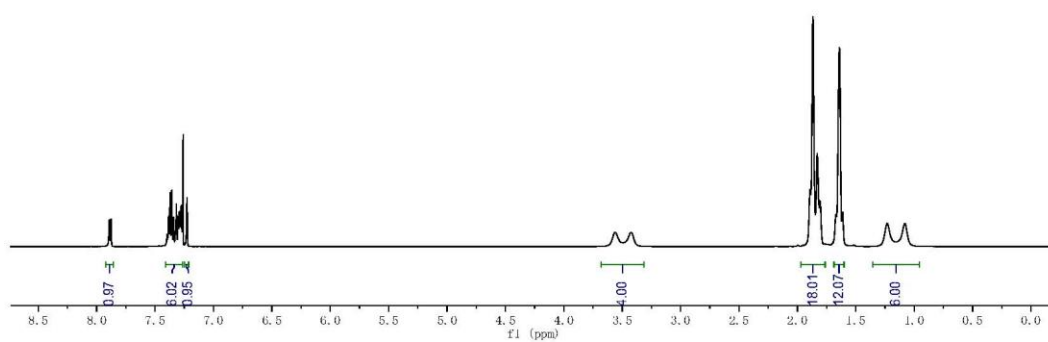

Supplementary Figure 33. <sup>1</sup>H NMR spectrum of L5.

Parameter Value  
Title wyz7-296-2-C13  
Solvent CDCl3  
Spectrometer Frequency 125.70  
Nucleus 13C

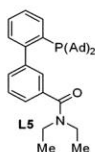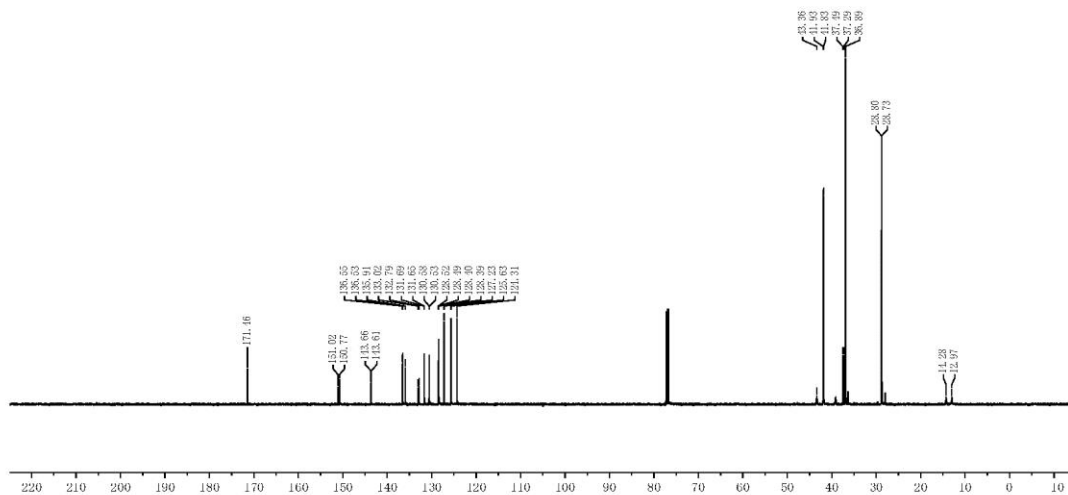

Supplementary Figure 34. <sup>13</sup>C NMR spectrum of L5.

| Parameter              | Value          |
|------------------------|----------------|
| Title                  | wyz7-296-2-p31 |
| Solvent                | cdcl3          |
| Spectrometer Frequency | 161.90         |
| Nucleus                | 31P            |

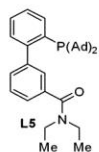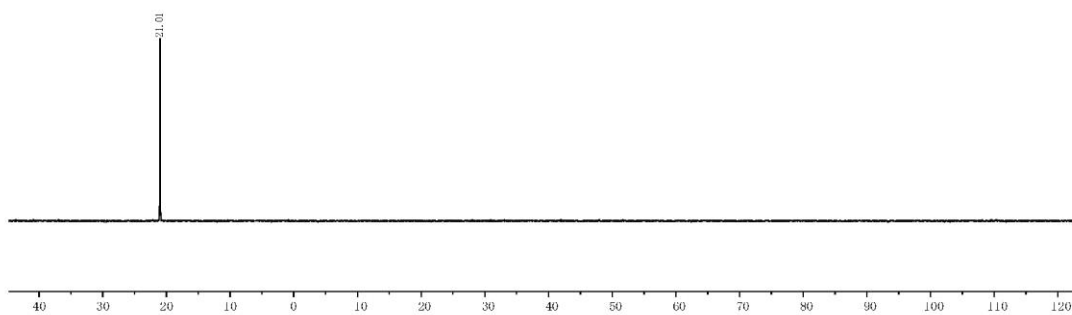

Supplementary Figure 35. <sup>31</sup>P NMR spectrum of L5.

## Single Mass Analysis

Tolerance = 3.0 mDa / DBE: min = -1.5, max = 50.0

Selected filters: None

Monoisotopic Mass, Even Electron Ions

4336 formula(e) evaluated with 17 results within limits (all results (up to 1000) for each mass)

Elements Used:

C: 0-100 H: 0-100 N: 0-10 O: 0-10 Na: 0-1 P: 0-2

Wang/Zhang, wylL5, mw 553; ESI+

ZHA102213ME 131 (2.437) Cn (Cen,4, 60.00, Ar); Sm (SG, 4x3.00); Cm (108:190)

UCSB CHEM BIOCHEM QTOF2  
TOF MS ES+  
1.92e3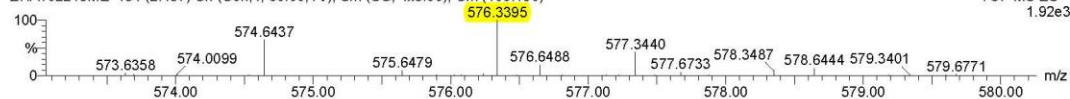

Minimum: -1.5  
Maximum: 3.0 10.0 50.0

| Mass     | Calc. Mass | mDa  | PPM  | DBE  | i-FIT | Formula             |
|----------|------------|------|------|------|-------|---------------------|
| 576.3395 | 576.3395   | 0.0  | 0.0  | 17.5 | 1.2   | C39 H47 N O P       |
|          | 576.3397   | -0.2 | -0.3 | 9.5  | 11.3  | C29 H46 N5 O7       |
|          | 576.3390   | 0.5  | 0.9  | 1.5  | 36.0  | C25 H52 N3 O8 Na P  |
|          | 576.3387   | 0.8  | 1.4  | 5.5  | 39.8  | C23 H47 N9 O6 P     |
|          | 576.3403   | -0.8 | -1.4 | 0.5  | 60.3  | C21 H52 N7 O7 P2    |
|          | 576.3387   | 0.8  | 1.4  | 11.5 | 13.6  | C28 H43 N9 O3 Na    |
|          | 576.3403   | -0.8 | -1.4 | 6.5  | 26.3  | C26 H48 N7 O4 Na P  |
|          | 576.3385   | 1.0  | 1.7  | 13.5 | 3.5   | C33 H48 N5 P2       |
|          | 576.3411   | -1.6 | -2.8 | 14.5 | 6.1   | C30 H42 N9 O3       |
|          | 576.3379   | 1.6  | 2.8  | 22.5 | 6.1   | C41 H42 N3          |
|          | 576.3413   | -1.8 | -3.1 | 10.5 | 4.8   | C32 H47 N3 O5 Na    |
|          | 576.3414   | -1.9 | -3.3 | 4.5  | 23.1  | C27 H51 N3 O8 P     |
|          | 576.3374   | 2.1  | 3.6  | 0.5  | 52.0  | C22 H51 N5 O10 P    |
|          | 576.3373   | 2.2  | 3.8  | 6.5  | 20.8  | C27 H47 N5 O7 Na    |
|          | 576.3372   | 2.3  | 4.0  | 8.5  | 7.2   | C32 H52 N O4 P2     |
|          | 576.3371   | 2.4  | 4.2  | 14.5 | 0.2   | C37 H48 N O Na P    |
|          | 576.3420   | -2.5 | -4.3 | 1.5  | 43.4  | C24 H53 N5 O5 Na P2 |

Supplementary Figure 36. HRMS of L5.

| Parameter                 | Value          |
|---------------------------|----------------|
| 1. Title                  | zhkum-3-L5AuCl |
| 2. Solvent                | cdcl3          |
| 3. Spectrometer Frequency | 599.64         |

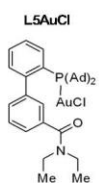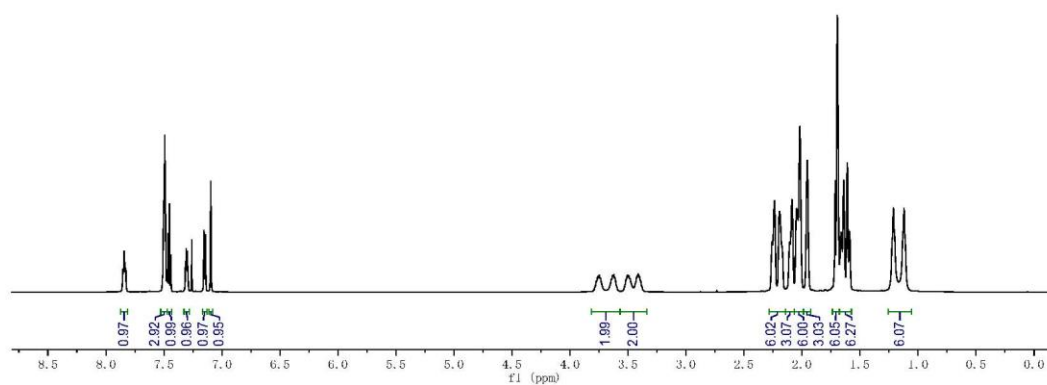

**Supplementary Figure 37. <sup>1</sup>H NMR spectrum of L5AuCl.**





| Parameter              | Value             |
|------------------------|-------------------|
| Title                  | wyz8-L6AuCl-P31   |
| Solvent                | cdCl <sub>3</sub> |
| Spectrometer Frequency | 161.90            |
| Nucleus                | <sup>31</sup> P   |

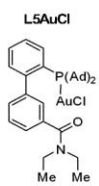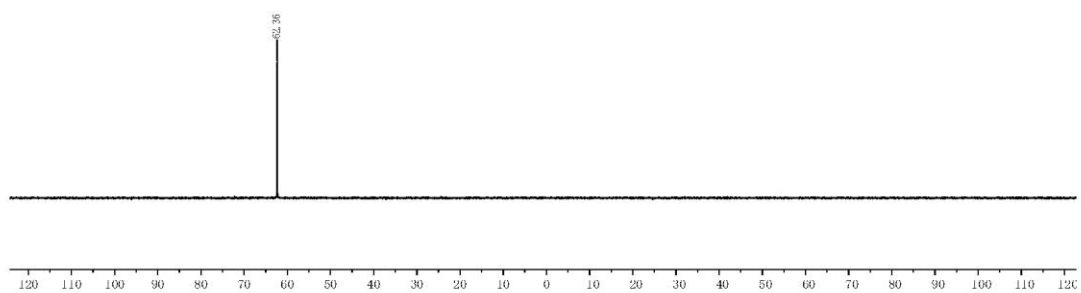

**Supplementary Figure 39. <sup>31</sup>P NMR spectrum of L5AuCl.**

Single Mass Analysis

Tolerance = 3.0 mDa / DBE: min = -1.5, max = 50.0

Selected filters: None

Monoisotopic Mass, Even Electron Ions

19398 formula(e) evaluated with 61 results within limits (all results (up to 1000) for each mass)

Elements Used:

C: 0-100 H: 0-100 N: 0-10 O: 0-10 Na: 0-1 P: 0-1 Cl: 0-1 Au: 0-4

Wang/Zhang, wyl5AuCl, mw 785; ESI+  
ZHA102213MM 224 (4.248) Cn (Cen,4, 60.00, Ar); Sm (SG, 4x3.00); Cm (194;257)

UCSB CHEM BIOCHEM QTOF2  
TOF MS ES+  
4.75e3

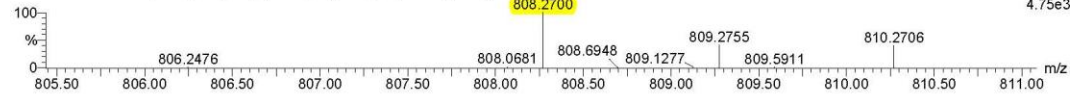

Minimum: -1.5  
 Maximum: 50.0

| Mass     | Calc. Mass | mDa  | PPM  | DBE  | i-FIT | Formula                  |
|----------|------------|------|------|------|-------|--------------------------|
| 808.2700 | 808.2729   | -2.9 | -3.6 | 37.5 | 454.0 | C54 H39 N3 O3 P          |
|          | 808.2729   | -2.9 | -3.6 | 43.5 | 471.7 | C59 H35 N3 Na            |
|          | 808.2728   | -2.8 | -3.5 | 0.5  | 91.9  | C22 H51 N5 O10 P Cl Au   |
|          | 808.2727   | -2.7 | -3.3 | 6.5  | 31.9  | C27 H47 N5 O7 Na Cl Au   |
|          | 808.2726   | -2.6 | -3.2 | 6.5  | 696.0 | C26 H47 N5 O8 Na P Au    |
|          | 808.2725   | -2.5 | -3.1 | 14.5 | 0.7   | C37 H48 N O Na P Cl Au   |
|          | 808.2725   | -2.5 | -3.1 | 21.5 | 22.2  | C41 H44 N5 O9 Na Cl      |
|          | 808.2724   | -2.4 | -3.0 | 21.5 | 463.1 | C40 H44 N5 O10 Na P      |
|          | 808.2723   | -2.3 | -2.8 | 29.5 | 91.2  | C51 H45 N O3 Na P Cl     |
|          | 808.2721   | -2.1 | -2.6 | 33.5 | 89.0  | C49 H40 N7 O P Cl        |
|          | 808.2717   | -1.7 | -2.1 | 2.5  | 89.7  | C21 H48 N9 O6 Na P Cl Au |
|          | 808.2715   | -1.5 | -1.9 | 17.5 | 3.0   | C35 H45 N9 O8 Na P Cl    |
|          | 808.2715   | -1.5 | -1.9 | 27.5 | 516.2 | C42 H37 N5 Au            |
|          | 808.2713   | -1.3 | -1.6 | 42.5 | 459.4 | C56 H34 N5 O2            |
|          | 808.2711   | -1.1 | -1.4 | -1.5 | 149.5 | C20 H50 N3 O P Cl Au2    |
|          | 808.2711   | -1.1 | -1.4 | 5.5  | 55.9  | C24 H46 N7 O9 Cl Au      |
|          | 808.2709   | -0.9 | -1.1 | 5.5  | 735.2 | C23 H46 N7 O10 P Au      |
|          | 808.2709   | -0.9 | -1.1 | 13.5 | 0.9   | C34 H47 N3 O3 P Cl Au    |
|          | 808.2709   | -0.9 | -1.1 | 11.5 | 647.2 | C28 H42 N7 O7 Na Au      |
|          | 808.2709   | -0.9 | -1.1 | 19.5 | 6.1   | C39 H43 N3 Na Cl Au      |
|          | 808.2707   | -0.7 | -0.9 | 28.5 | 68.9  | C48 H44 N3 O5 P Cl       |
|          | 808.2707   | -0.7 | -0.9 | 19.5 | 556.1 | C38 H43 N3 O Na P Au     |
|          | 808.2707   | -0.7 | -0.9 | 26.5 | 450.9 | C42 H39 N7 O9 Na         |
|          | 808.2707   | -0.7 | -0.9 | 34.5 | 119.0 | C53 H40 N3 O2 Na Cl      |
|          | 808.2705   | -0.5 | -0.6 | 34.5 | 454.7 | C52 H40 N3 O3 Na P       |
|          | 808.2704   | -0.4 | -0.5 | 38.5 | 116.5 | C51 H35 N9 Cl            |
|          | 808.2703   | -0.3 | -0.4 | 7.5  | 762.8 | C27 H44 N O2 Au2         |
|          | 808.2702   | -0.2 | -0.2 | 38.5 | 465.0 | C50 H35 N9 O P           |
|          | 808.2701   | -0.1 | -0.1 | 22.5 | 508.3 | C41 H41 N O4 Au          |
|          | 808.2699   | 0.1  | 0.1  | 37.5 | 438.9 | C55 H38 N O6             |
|          | 808.2696   | 0.4  | 0.5  | 30.5 | 69.0  | C47 H41 N7 O Na P Cl     |
|          | 808.2695   | 0.5  | 0.6  | 3.5  | 100.9 | C22 H45 N5 Cl Au2        |
|          | 808.2693   | 0.7  | 0.9  | 3.5  | 904.0 | C21 H45 N5 O P Au2       |
|          | 808.2693   | 0.7  | 0.9  | 10.5 | 680.3 | C25 H41 N9 O9 Au         |
|          | 808.2693   | 0.7  | 0.9  | 18.5 | 1.0   | C36 H42 N5 O2 Cl Au      |
|          | 808.2691   | 0.9  | 1.1  | 18.5 | 571.3 | C35 H42 N5 O3 P Au       |
|          | 808.2691   | 0.9  | 1.1  | 33.5 | 94.5  | C50 H39 N5 O4 Cl         |
|          | 808.2691   | 0.9  | 1.1  | 24.5 | 534.4 | C40 H38 N5 Na Au         |
|          | 808.2689   | 1.1  | 1.4  | 33.5 | 448.1 | C49 H39 N5 O5 P          |
|          | 808.2688   | 1.2  | 1.5  | 39.5 | 458.1 | C54 H35 N5 O2 Na         |
|          | 808.2687   | 1.3  | 1.6  | 2.5  | 83.1  | C22 H47 N7 O9 Na Cl Au   |
|          | 808.2685   | 1.5  | 1.9  | 2.5  | 790.1 | C21 H47 N7 O10 Na P Au   |
|          | 808.2685   | 1.5  | 1.9  | 10.5 | 6.0   | C32 H48 N3 O3 Na P Cl Au |
|          | 808.2683   | 1.7  | 2.1  | 25.5 | 51.3  | C46 H45 N3 O5 Na P Cl    |
|          | 808.2682   | 1.8  | 2.2  | 14.5 | 6.7   | C30 H43 N9 O P Cl Au     |
|          | 808.2681   | 1.9  | 2.4  | -1.5 | 139.6 | C21 H49 N O4 Cl Au2      |
|          | 808.2680   | 2.0  | 2.5  | 29.5 | 49.4  | C44 H40 N9 O3 P Cl       |
|          | 808.2680   | 2.0  | 2.5  | 35.5 | 94.8  | C49 H36 N9 Na Cl         |
|          | 808.2680   | 2.0  | 2.5  | -1.5 | 934.9 | C20 H49 N O5 P Au2       |
|          | 808.2679   | 2.1  | 2.6  | 13.5 | 1.2   | C35 H46 N O6 Cl Au       |
|          | 808.2679   | 2.1  | 2.6  | 4.5  | 815.2 | C25 H45 N O2 Na Au2      |
|          | 808.2678   | 2.2  | 2.7  | 35.5 | 469.4 | C48 H36 N9 O Na P        |
|          | 808.2678   | 2.2  | 2.7  | 13.5 | 573.1 | C34 H46 N O7 P Au        |

Single Mass Analysis

Tolerance = 3.0 mDa / DBE: min = -1.5, max = 50.0

Selected filters: None

Monoisotopic Mass, Even Electron Ions

19398 formula(e) evaluated with 61 results within limits (all results (up to 1000) for each mass)

Elements Used:

C: 0-100 H: 0-100 N: 0-10 O: 0-10 Na: 0-1 P: 0-1 Cl: 0-1 Au: 0-4

Wang/Zhang, wylL5AuCl, mw 785; ESI+

ZHA102213MM 224 (4.248) Cn (Cen,4, 60.00, Ar); Sm (SG, 4x3.00); Cm (194:257)

UCSB CHEM BIOCHEM QTOF2

TOF MS ES+

4.75e3

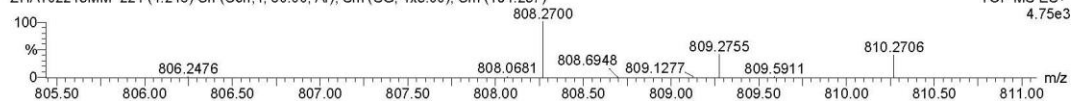

Minimum: -1.5  
Maximum: 50.0

| Mass     | Calc. Mass | mDa | PPM  | DBE   | i-FIT                | Formula |
|----------|------------|-----|------|-------|----------------------|---------|
| 808.2677 | 2.3        | 2.8 | 28.5 | 74.6  | C49 H43 N O8 Cl      |         |
| 808.2677 | 2.3        | 2.8 | 19.5 | 529.3 | C39 H42 N O4 Na Au   |         |
| 808.2676 | 2.4        | 3.0 | 8.5  | 837.7 | C23 H40 N7 Au2       |         |
| 808.2675 | 2.5        | 3.1 | 28.5 | 432.2 | C48 H43 N O9 P       |         |
| 808.2675 | 2.5        | 3.1 | 34.5 | 439.2 | C53 H39 N O6 Na      |         |
| 808.2674 | 2.6        | 3.2 | 23.5 | 545.3 | C37 H37 N7 O2 Au     |         |
| 808.2672 | 2.8        | 3.5 | 38.5 | 449.5 | C51 H34 N7 O4        |         |
| 808.2671 | 2.9        | 3.6 | 0.5  | 138.5 | C20 H46 N5 Na Cl Au2 |         |

Supplementary Figure 40. HRMS of L5AuCl.

Parameter Value  
Title wy27-296-3-H1-again  
Solvent CDCl3  
Spectrometer Frequency 499.86  
Nucleus 1H

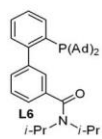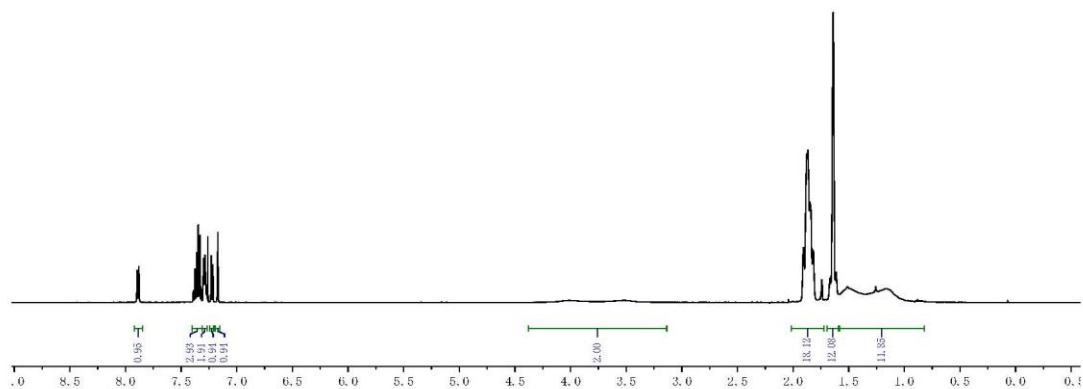

Supplementary Figure 41. <sup>1</sup>H NMR spectrum of L6.

Parameter Value  
Title wyz7-296-3-C13  
Solvent CDCl3  
Spectrometer Frequency 125.70  
Nucleus 13C

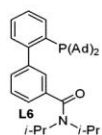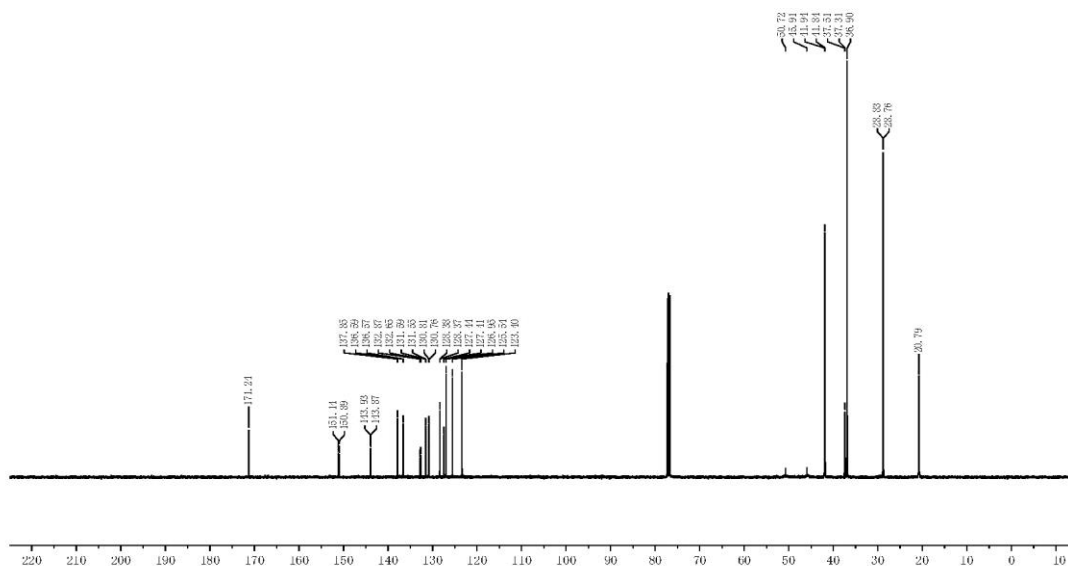

Supplementary Figure 42. <sup>13</sup>C NMR spectrum of L6.

| Parameter              | Value          |
|------------------------|----------------|
| Title                  | wyz7-296-3-p31 |
| Solvent                | cdcl3          |
| Spectrometer Frequency | 161.90         |
| Nucleus                | 31P            |

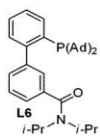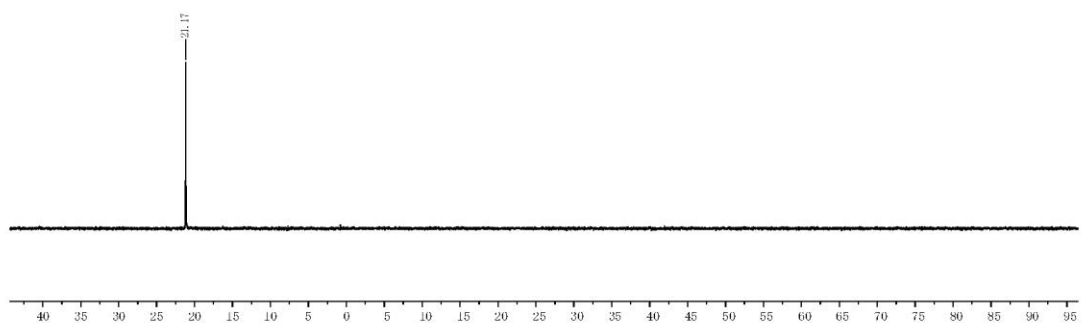

Supplementary Figure 43. <sup>31</sup>P NMR spectrum of L6.

Single Mass Analysis

Tolerance = 3.0 mDa / DBE: min = -1.5, max = 50.0

Selected filters: None

Monoisotopic Mass, Even Electron Ions

4578 formula(e) evaluated with 19 results within limits (all results (up to 1000) for each mass)

Elements Used:

C: 0-100 H: 0-100 N: 0-10 O: 0-10 Na: 0-1 P: 0-2

Wang/Zhang, wylL6, mw 581; ESI+

ZHA102213MF 106 (1.972) Cn (Cen,4, 60.00, Ar); Sm (SG, 4x3.00); Cm (96:166)

UCSB CHEM BIOCHEM QTOF2  
TOF MS ES+  
2.32e3

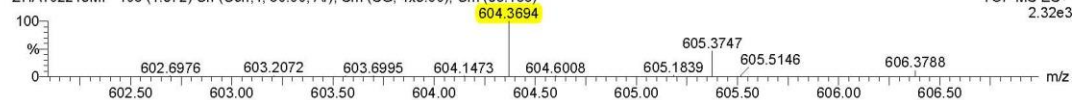

Minimum: -1.5  
Maximum: 3.0 10.0 50.0

| Mass     | Calc. Mass | mDa  | PPM  | DBE  | i-FIT | Formula            |
|----------|------------|------|------|------|-------|--------------------|
| 604.3694 | 604.3692   | 0.2  | 0.3  | 22.5 | 3.3   | C43 H46 N3         |
|          | 604.3698   | -0.4 | -0.7 | 13.5 | 8.1   | C35 H52 N5 P2      |
|          | 604.3700   | -0.6 | -1.0 | 11.5 | 22.6  | C30 H47 N9 O3 Na   |
|          | 604.3700   | -0.6 | -1.0 | 5.5  | 56.6  | C25 H51 N9 O6 P    |
|          | 604.3687   | 0.7  | 1.2  | 0.5  | 71.5  | C24 H55 N5 O10 P   |
|          | 604.3686   | 0.8  | 1.3  | 6.5  | 31.8  | C29 H51 N5 O7 Na   |
|          | 604.3703   | -0.9 | -1.5 | 1.5  | 51.6  | C27 H56 N3 O8 Na P |
|          | 604.3685   | 0.9  | 1.5  | 8.5  | 13.3  | C34 H56 N O4 P2    |
|          | 604.3684   | 1.0  | 1.7  | 14.5 | 1.0   | C39 H52 N O Na P   |
|          | 604.3708   | -1.4 | -2.3 | 17.5 | 0.2   | C41 H51 N O P      |
|          | 604.3710   | -1.6 | -2.6 | 9.5  | 18.9  | C31 H50 N5 O7      |
|          | 604.3676   | 1.8  | 3.0  | 2.5  | 78.1  | C23 H52 N9 O6 Na P |
|          | 604.3674   | 2.0  | 3.3  | 10.5 | 17.2  | C33 H53 N5 Na P2   |
|          | 604.3716   | -2.2 | -3.6 | 0.5  | 82.5  | C23 H56 N7 O7 P2   |
|          | 604.3716   | -2.2 | -3.6 | 6.5  | 39.5  | C28 H52 N7 O4 Na P |
|          | 604.3670   | 2.4  | 4.0  | 5.5  | 47.8  | C26 H50 N7 O9      |
|          | 604.3668   | 2.6  | 4.3  | 13.5 | 4.8   | C36 H51 N3 O3 P    |
|          | 604.3668   | 2.6  | 4.3  | 19.5 | 0.8   | C41 H47 N3 Na      |
|          | 604.3724   | -3.0 | -5.0 | 14.5 | 12.1  | C32 H46 N9 O3      |

Supplementary Figure 44. HRMS of L6.

Parameter Value  
Title zhikun-3-L6AuCl  
Solvent cdcl3  
Spectrometer Frequency 599.64

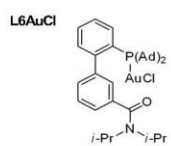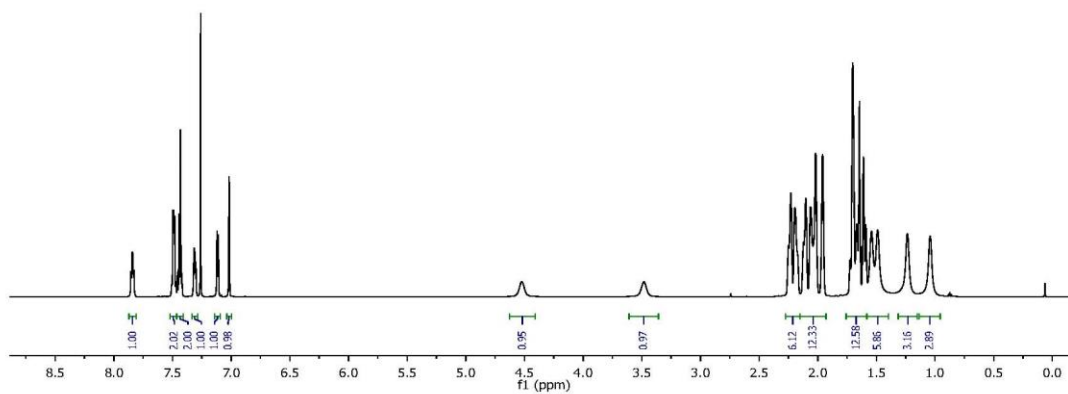

Supplementary Figure 45.  $^1\text{H}$  NMR spectrum of L6AuCl.



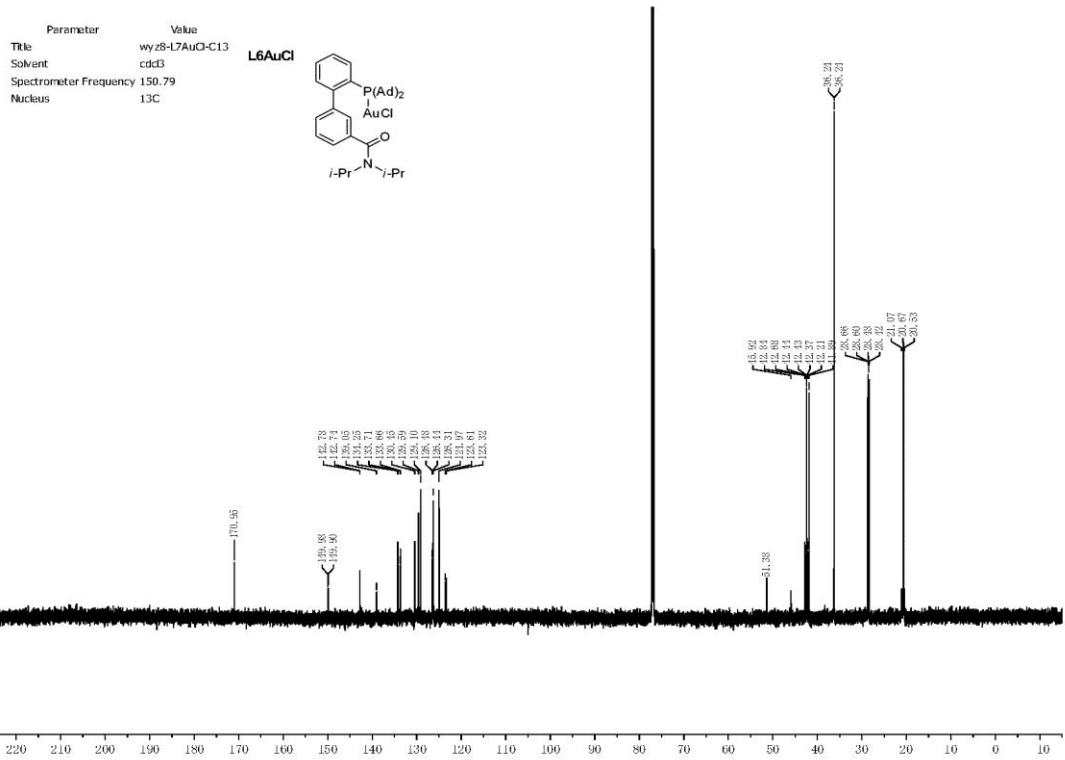

Supplementary Figure 46. <sup>13</sup>C NMR spectrum of L6AuCl.

Parameter Value  
Title wy28-L7AuCl-P31  
Solvent cdcCl3  
Spectrometer Frequency 161.90  
Nucleus 31P

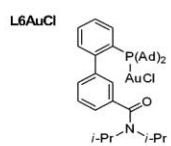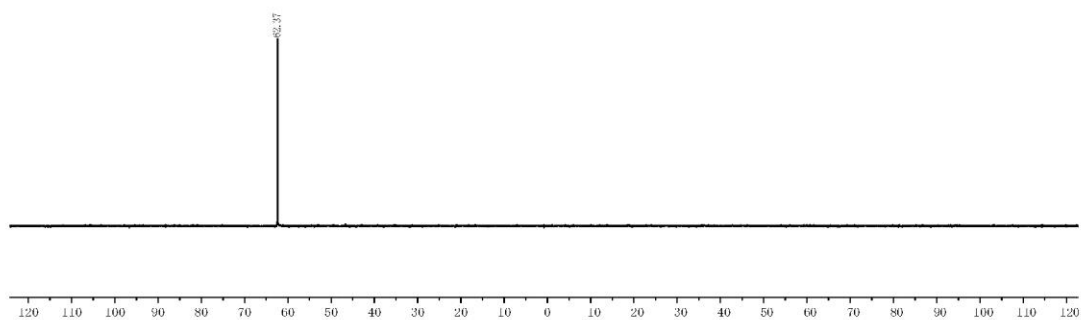

**Supplementary Figure 47.  $^{31}\text{P}$  NMR spectrum of L6AuCl.**

Single Mass Analysis

Tolerance = 3.0 mDa / DBE: min = -1.5, max = 50.0

Selected filters: None

Monoisotopic Mass, Even Electron Ions

20565 formula(e) evaluated with 60 results within limits (all results (up to 1000) for each mass)

Elements Used:

C: 0-100 H: 0-100 N: 0-10 O: 0-10 Na: 0-1 P: 0-1 Cl: 0-1 Au: 0-4

Wang/Zhang, wylL6AuCl, mw 813; ESI+

ZHA102213MN 188 (3.567) Cn (Cen,4, 60.00, Ar); Sm (SG, 4x3.00); Cm (117.228)

UCSB CHEM BIOCHEM QTOF2

TOF MS ES+

1.40e4

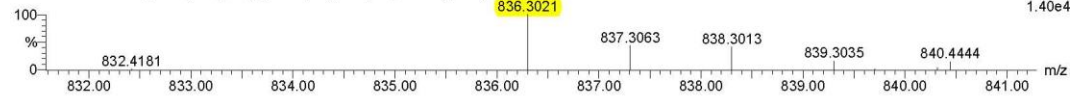

Minimum: -1.5  
 Maximum: 50.0

| Mass     | Calc. Mass | mDa  | PPM  | DBE  | i-FIT  | Formula                  |
|----------|------------|------|------|------|--------|--------------------------|
| 836.3021 | 836.3050   | -2.9 | -3.5 | 26.5 | 1314.9 | C43 H44 N9 O6 Na P       |
|          | 836.3049   | -2.8 | -3.3 | 10.5 | 1690.3 | C34 H50 N O9 Na Au       |
|          | 836.3048   | -2.7 | -3.2 | -0.5 | 2925.3 | C18 H48 N7 O5 Au2        |
|          | 836.3046   | -2.5 | -3.0 | 14.5 | 1743.8 | C32 H45 N7 O7 Au         |
|          | 836.3046   | -2.5 | -3.0 | 22.5 | 36.3   | C43 H46 N3 Cl Au         |
|          | 836.3044   | -2.3 | -2.8 | 22.5 | 1500.4 | C42 H46 N3 O P Au        |
|          | 836.3044   | -2.3 | -2.8 | 29.5 | 1214.8 | C46 H42 N7 O9            |
|          | 836.3044   | -2.3 | -2.8 | 37.5 | 388.2  | C57 H43 N3 O2 Cl         |
|          | 836.3042   | -2.1 | -2.5 | 37.5 | 1228.2 | C56 H43 N3 O3 P          |
|          | 836.3042   | -2.1 | -2.5 | 43.5 | 1267.9 | C61 H39 N3 Na            |
|          | 836.3041   | -2.0 | -2.4 | 0.5  | 265.4  | C24 H55 N5 O10 P Cl Au   |
|          | 836.3040   | -1.9 | -2.3 | 6.5  | 95.8   | C29 H51 N5 O7 Na Cl Au   |
|          | 836.3039   | -1.8 | -2.2 | 6.5  | 2006.7 | C28 H51 N5 O8 Na P Au    |
|          | 836.3038   | -1.7 | -2.0 | 14.5 | 1.3    | C39 H52 N O Na P Cl Au   |
|          | 836.3038   | -1.7 | -2.0 | 21.5 | 59.7   | C43 H48 N5 O9 Na Cl      |
|          | 836.3037   | -1.6 | -1.9 | 21.5 | 1294.2 | C42 H48 N5 O10 Na P      |
|          | 836.3036   | -1.5 | -1.8 | 29.5 | 246.2  | C53 H49 N O3 Na P Cl     |
|          | 836.3034   | -1.3 | -1.6 | 33.5 | 238.8  | C51 H44 N7 O P Cl        |
|          | 836.3030   | -0.9 | -1.1 | 2.5  | 259.2  | C23 H52 N9 O6 Na P Cl Au |
|          | 836.3028   | -0.7 | -0.8 | 17.5 | 9.1    | C37 H49 N9 O8 Na P Cl    |
|          | 836.3028   | -0.7 | -0.8 | 27.5 | 1441.1 | C44 H41 N5 Au            |
|          | 836.3026   | -0.5 | -0.6 | 42.5 | 1238.0 | C58 H38 N5 O2            |
|          | 836.3024   | -0.3 | -0.4 | -1.5 | 426.1  | C22 H54 N3 O P Cl Au2    |
|          | 836.3024   | -0.3 | -0.4 | 5.5  | 164.0  | C26 H50 N7 O9 Cl Au      |
|          | 836.3022   | -0.1 | -0.1 | 5.5  | 2125.3 | C25 H50 N7 O10 P Au      |
|          | 836.3022   | -0.1 | -0.1 | 13.5 | 4.4    | C36 H51 N3 O3 P Cl Au    |
|          | 836.3022   | -0.1 | -0.1 | 11.5 | 1860.0 | C30 H46 N7 O7 Na Au      |
|          | 836.3022   | -0.1 | -0.1 | 19.5 | 14.4   | C41 H47 N3 Na Cl Au      |
|          | 836.3020   | 0.1  | 0.1  | 28.5 | 185.6  | C50 H48 N3 O5 P Cl       |
|          | 836.3020   | 0.1  | 0.1  | 19.5 | 1571.3 | C40 H47 N3 O Na P Au     |
|          | 836.3020   | 0.1  | 0.1  | 26.5 | 1250.8 | C44 H43 N7 O9 Na         |
|          | 836.3020   | 0.1  | 0.1  | 34.5 | 322.2  | C55 H44 N3 O2 Na Cl      |
|          | 836.3018   | 0.3  | 0.4  | 34.5 | 1236.2 | C54 H44 N3 O3 Na P       |
|          | 836.3017   | 0.4  | 0.5  | 38.5 | 314.8  | C53 H39 N9 Cl            |
|          | 836.3016   | 0.5  | 0.6  | 7.5  | 2202.0 | C29 H48 N O2 Au2         |
|          | 836.3015   | 0.6  | 0.7  | 38.5 | 1266.2 | C52 H39 N9 O P           |
|          | 836.3014   | 0.7  | 0.8  | 22.5 | 1425.4 | C43 H45 N O4 Au          |
|          | 836.3012   | 0.9  | 1.1  | 37.5 | 1186.3 | C57 H42 N O6             |
|          | 836.3009   | 1.2  | 1.4  | 30.5 | 184.1  | C49 H45 N7 O Na P Cl     |
|          | 836.3008   | 1.3  | 1.6  | 3.5  | 290.4  | C24 H49 N5 Cl Au2        |
|          | 836.3006   | 1.5  | 1.8  | 3.5  | 2621.1 | C23 H49 N5 O P Au2       |
|          | 836.3006   | 1.5  | 1.8  | 10.5 | 1961.0 | C27 H45 N9 O9 Au         |
|          | 836.3006   | 1.5  | 1.8  | 18.5 | 2.5    | C38 H46 N5 O2 Cl Au      |
|          | 836.3004   | 1.7  | 2.0  | 18.5 | 1622.6 | C37 H46 N5 O3 P Au       |
|          | 836.3004   | 1.7  | 2.0  | 33.5 | 255.7  | C52 H43 N5 O4 Cl         |
|          | 836.3004   | 1.7  | 2.0  | 24.5 | 1500.0 | C42 H42 N5 Na Au         |
|          | 836.3002   | 1.9  | 2.3  | 33.5 | 1223.4 | C51 H43 N5 O5 P          |
|          | 836.3001   | 2.0  | 2.4  | 39.5 | 1239.6 | C56 H39 N5 O2 Na         |
|          | 836.3000   | 2.1  | 2.5  | 2.5  | 240.6  | C24 H51 N7 O9 Na Cl Au   |
|          | 836.2998   | 2.3  | 2.8  | 2.5  | 2287.5 | C23 H51 N7 O10 Na P Au   |
|          | 836.2998   | 2.3  | 2.8  | 10.5 | 20.0   | C34 H52 N3 O3 Na P Cl Au |
|          | 836.2996   | 2.5  | 3.0  | 25.5 | 137.3  | C48 H49 N3 O5 Na P Cl    |
|          | 836.2995   | 2.6  | 3.1  | 14.5 | 21.7   | C32 H47 N9 O P Cl Au     |

Single Mass Analysis

Tolerance = 3.0 mDa / DBE: min = -1.5, max = 50.0

Selected filters: None

Monoisotopic Mass, Even Electron Ions

20565 formula(e) evaluated with 60 results within limits (all results (up to 1000) for each mass)

Elements Used:

C: 0-100 H: 0-100 N: 0-10 O: 0-10 Na: 0-1 P: 0-1 Cl: 0-1 Au: 0-4

Wang/Zhang, wylL6AuCl, mw 813; ESI+

ZHA102213MN 188 (3.567) Cn (Cen,4, 60.00, Ar); Sm (SG, 4x3.00); Cm (117:228)

UCSB CHEM BIOCHEM QTOF2

TOF MS ES+

1.40e4

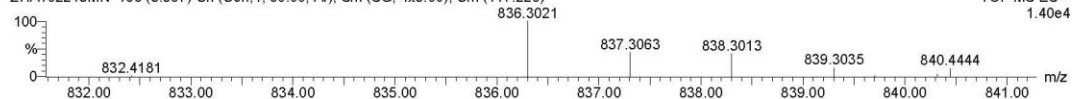

Minimum: -1.5  
Maximum: 50.0

| Mass     | Calc. Mass | mDa | PPM  | DBE    | i-FIT               | Formula |
|----------|------------|-----|------|--------|---------------------|---------|
| 836.2994 | 2.7        | 3.2 | -1.5 | 398.8  | C23 H53 N O4 Cl Au2 |         |
| 836.2993 | 2.8        | 3.3 | 29.5 | 131.5  | C46 H44 N9 O3 P Cl  |         |
| 836.2993 | 2.8        | 3.3 | 35.5 | 254.9  | C51 H40 N9 Na Cl    |         |
| 836.2993 | 2.8        | 3.3 | -1.5 | 2713.0 | C22 H53 N O5 P Au2  |         |
| 836.2992 | 2.9        | 3.5 | 13.5 | 5.4    | C37 H50 N O6 Cl Au  |         |
| 836.2992 | 2.9        | 3.5 | 4.5  | 2358.3 | C27 H49 N O2 Na Au2 |         |
| 836.2991 | 3.0        | 3.6 | 35.5 | 1284.5 | C50 H40 N9 O Na P   |         |

Supplementary Figure 48. HRMS of L6AuCl.

Parameter Value  
Title zhkun-3-L7  
Solvent cdcl3  
Spectrometer Frequency 599.64

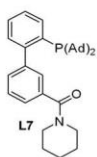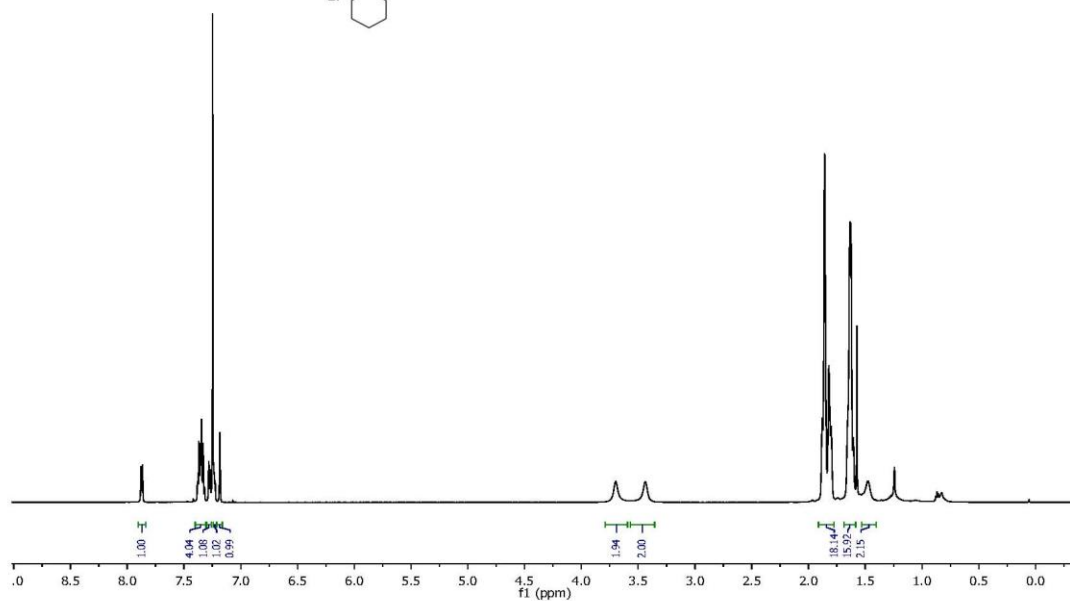

Supplementary Figure 49. <sup>1</sup>H NMR spectrum of L7.

Parameter Value  
Title wyz7-296-1-C13  
Solvent CDCl3  
Spectrometer Frequency 125.70  
Nucleus 13C

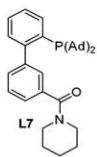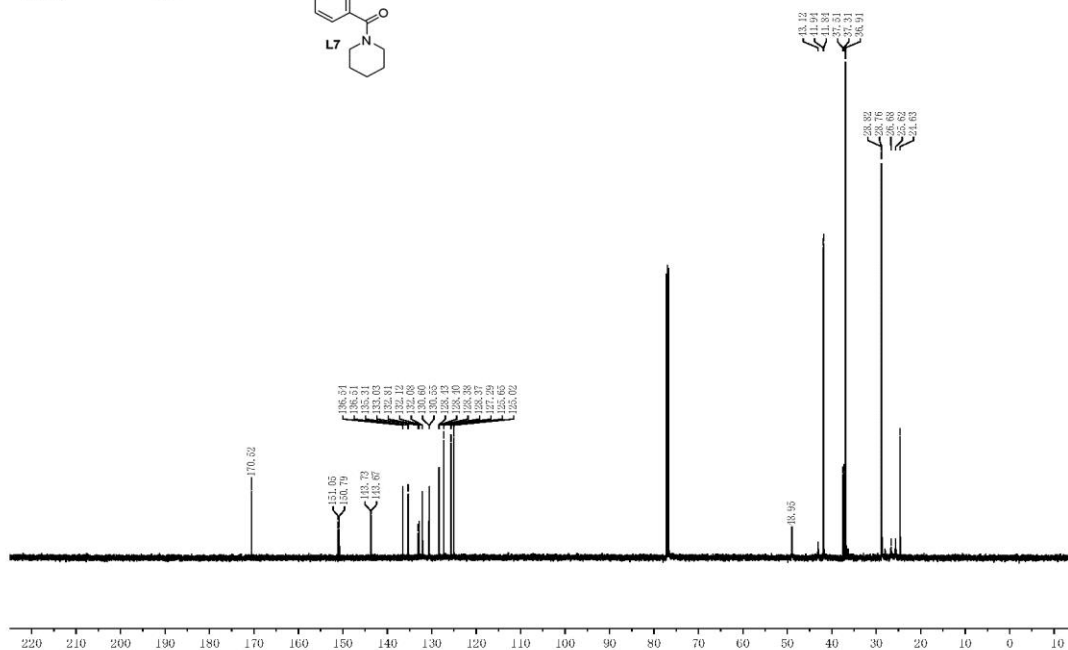

Supplementary Figure 50.  $^{13}\text{C}$  NMR spectrum of L7.

Parameter Value  
Title wvz7-296-1-p31  
Solvent cdcl3  
Spectrometer Frequency 161.90  
Nucleus 31P

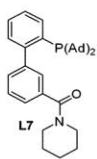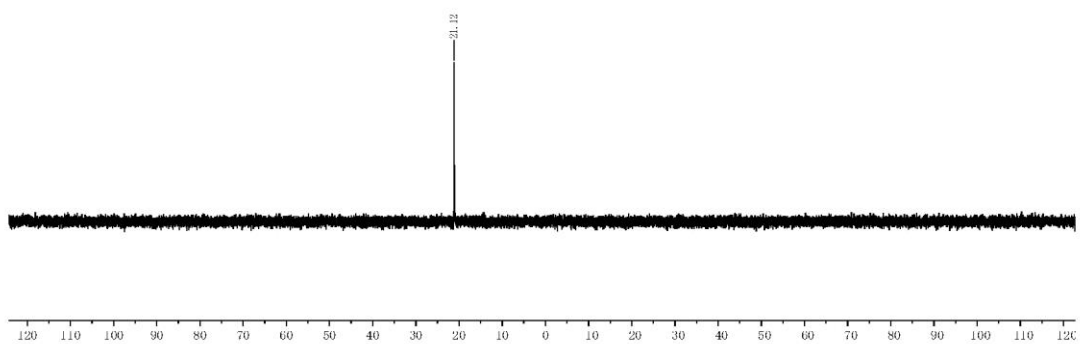

Supplementary Figure 51.  $^{31}\text{P}$  NMR spectrum of L7.

## Single Mass Analysis

Tolerance = 3.0 mDa / DBE: min = -1.5, max = 50.0

Selected filters: None

Monoisotopic Mass, Even Electron Ions

4441 formula(e) evaluated with 22 results within limits (all results (up to 1000) for each mass)

Elements Used:

C: 0-100 H: 0-100 N: 0-10 O: 0-10 Na: 0-1 P: 0-2

Wang/Zhang, wylzL7, mw 565; ESI+

ZHA102213MG 632 (11.730) Cn (Cen,4, 60.00, Ar); Sm (SG, 4x3.00); Cm (629:675)

UCSB CHEM BIOCHEM QTOF2  
TOF MS ES+  
1.06e3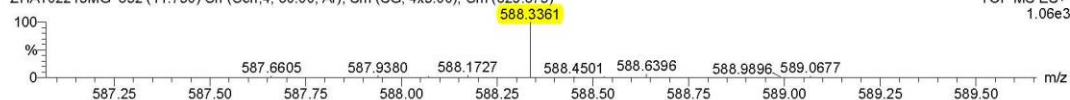

Minimum: -1.5  
Maximum: 3.0 10.0 50.0

| Mass     | Calc. Mass | mDa  | PPM  | DBE  | i-FIT     | Formula             |
|----------|------------|------|------|------|-----------|---------------------|
| 588.3361 | 588.3361   | 0.0  | 0.0  | 11.5 | 5546549.0 | C32 H49 N5 Na P2    |
|          | 588.3363   | -0.2 | -0.3 | 3.5  | 5546545.5 | C22 H48 N9 O6 Na P  |
|          | 588.3357   | 0.4  | 0.7  | 6.5  | 5546547.0 | C25 H46 N7 O9       |
|          | 588.3355   | 0.6  | 1.0  | 14.5 | 5546549.5 | C35 H47 N3 O3 P     |
|          | 588.3355   | 0.6  | 1.0  | 20.5 | 5546550.5 | C40 H43 N3 Na       |
|          | 588.3371   | -1.0 | -1.7 | 15.5 | 5546550.0 | C38 H48 N O Na P    |
|          | 588.3350   | 1.1  | 1.9  | -1.5 | 5546544.0 | C21 H52 N5 O10 Na P |
|          | 588.3372   | -1.1 | -1.9 | 9.5  | 5546549.0 | C33 H52 N O4 P2     |
|          | 588.3373   | -1.2 | -2.0 | 7.5  | 5546548.0 | C28 H47 N5 O7 Na    |
|          | 588.3374   | -1.3 | -2.2 | 1.5  | 5546545.5 | C23 H51 N5 O10 P    |
|          | 588.3348   | 1.3  | 2.2  | 6.5  | 5546548.5 | C31 H53 N O4 Na P2  |
|          | 588.3345   | 1.6  | 2.7  | 10.5 | 5546548.5 | C29 H48 N7 O2 P2    |
|          | 588.3379   | -1.8 | -3.1 | -1.5 | 5546544.0 | C20 H53 N7 O7 Na P2 |
|          | 588.3379   | -1.8 | -3.1 | 23.5 | 5546551.0 | C42 H42 N3          |
|          | 588.3339   | 2.2  | 3.7  | 19.5 | 5546550.0 | C37 H42 N5 O2       |
|          | 588.3385   | -2.4 | -4.1 | 14.5 | 5546549.5 | C34 H48 N5 P2       |
|          | 588.3387   | -2.6 | -4.4 | 6.5  | 5546546.5 | C24 H47 N9 O6 P     |
|          | 588.3387   | -2.6 | -4.4 | 12.5 | 5546548.5 | C29 H43 N9 O3 Na    |
|          | 588.3333   | 2.8  | 4.8  | 3.5  | 5546546.0 | C23 H47 N7 O9 Na    |
|          | 588.3390   | -2.9 | -4.9 | 2.5  | 5546546.5 | C26 H52 N3 O8 Na P  |
|          | 588.3331   | 3.0  | 5.1  | 5.5  | 5546547.5 | C28 H52 N3 O6 P2    |
|          | 588.3331   | 3.0  | 5.1  | 11.5 | 5546549.0 | C33 H48 N3 O3 Na P  |

Supplementary Figure 52. HRMS of L7.



Parameter Value  
1 Data File Name C:/Users/zhang leptop/Desktop/NMR/ywang/wyz8-4.5AuCl.fid  
2 Title wyz8-4.5AuCl  
3 Solvent cdCl3  
4 Spectrometer Frequency 599.64

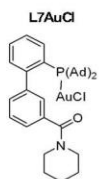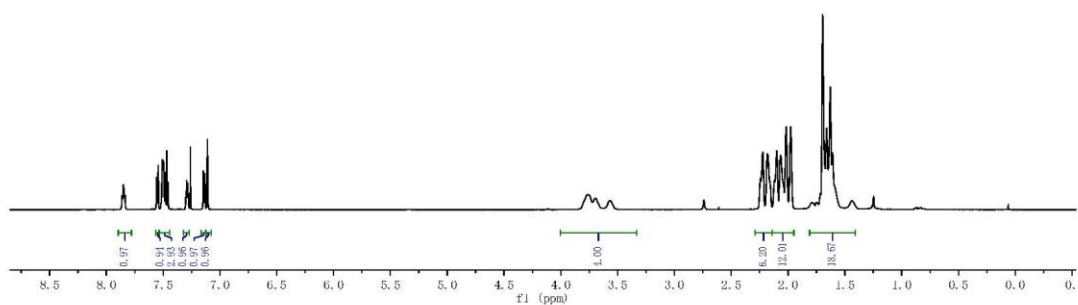

Supplementary Figure 53.  $^1\text{H}$  NMR spectrum of L7AuCl.



| Parameter              | Value             |
|------------------------|-------------------|
| Title                  | wyz8-L5AuCl-P31   |
| Solvent                | cdCl <sub>3</sub> |
| Spectrometer Frequency | 161.90            |
| Nucleus                | <sup>31</sup> P   |

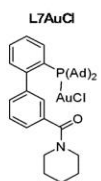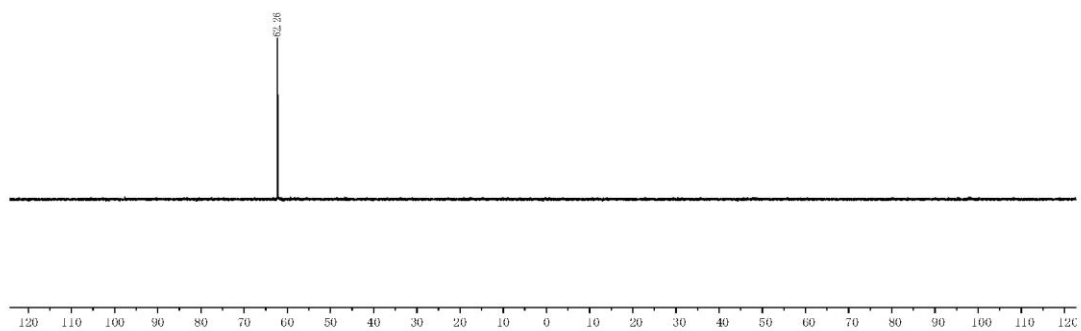

**Supplementary Figure 55. <sup>31</sup>P NMR spectrum of L7AuCl.**

Single Mass Analysis

Tolerance = 3.0 mDa / DBE: min = -1.5, max = 50.0

Selected filters: None

Monoisotopic Mass, Even Electron Ions

19910 formula(e) evaluated with 59 results within limits (all results (up to 1000) for each mass)

Elements Used:

C: 0-100 H: 0-100 N: 0-10 O: 0-10 Na: 0-1 P: 0-1 Cl: 0-1 Au: 0-4

Wang/Zhang, wyl7AuCl, mw 797; ESI+

ZHA102213MO 146 (2.772) Cn (Cen,4, 60.00, Ar); Sm (SG, 4x3.00); Cm (73:150)

UCSB CHEM BIOCHEM QTOF2

TOF MS ES+

974

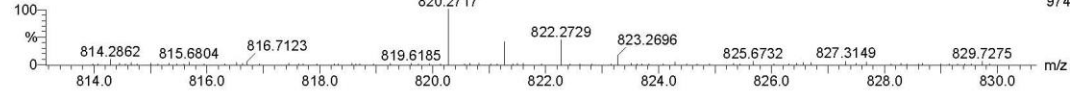

Minimum: -1.5  
 Maximum: 50.0

| Mass     | Calc. Mass | mDa  | PPM  | DBE  | i-FIT | Formula                   |
|----------|------------|------|------|------|-------|---------------------------|
| 820.2717 | 820.2717   | 0.0  | 0.0  | 3.5  | 19.1  | C22 H48 N9 O6 Na P Cl Au  |
| 820.2715 | 820.2715   | 0.2  | 0.2  | 28.5 | 122.5 | C43 H37 N5 Au             |
| 820.2713 | 820.2713   | 0.2  | 0.2  | 18.5 | 0.9   | C36 H45 N9 O8 Na P Cl     |
| 820.2713 | 820.2713   | 0.4  | 0.5  | 43.5 | 108.3 | C57 H34 N5 O2             |
| 820.2721 | 820.2721   | -0.4 | -0.5 | 34.5 | 18.4  | C50 H40 N7 O P Cl         |
| 820.2711 | 820.2711   | 0.6  | 0.7  | -0.5 | 32.0  | C21 H50 N3 O P Cl Au2     |
| 820.2723 | 820.2723   | -0.6 | -0.7 | 30.5 | 18.6  | C52 H45 N O3 Na P Cl      |
| 820.2711 | 820.2711   | 0.6  | 0.7  | 6.5  | 11.8  | C25 H46 N7 O9 Cl Au       |
| 820.2724 | 820.2724   | -0.7 | -0.9 | 22.5 | 111.4 | C41 H44 N5 O10 Na P       |
| 820.2709 | 820.2709   | 0.8  | 1.0  | 20.5 | 2.6   | C40 H43 N3 Na Cl Au       |
| 820.2709 | 820.2709   | 0.8  | 1.0  | 12.5 | 150.1 | C29 H42 N7 O7 Na Au       |
| 820.2725 | 820.2725   | -0.8 | -1.0 | 15.5 | 1.5   | C38 H48 N O Na P Cl Au    |
| 820.2725 | 820.2725   | -0.8 | -1.0 | 22.5 | 4.4   | C42 H44 N5 O9 Na Cl       |
| 820.2709 | 820.2709   | 0.8  | 1.0  | 6.5  | 168.0 | C24 H46 N7 O10 P Au       |
| 820.2709 | 820.2709   | 0.8  | 1.0  | 14.5 | 1.4   | C35 H47 N3 O3 P Cl Au     |
| 820.2726 | 820.2726   | -0.9 | -1.1 | 7.5  | 160.0 | C27 H47 N5 O8 Na P Au     |
| 820.2707 | 820.2707   | 1.0  | 1.2  | 35.5 | 24.1  | C54 H40 N3 O2 Na Cl       |
| 820.2707 | 820.2707   | 1.0  | 1.2  | 27.5 | 108.6 | C43 H39 N7 O9 Na          |
| 820.2707 | 820.2707   | 1.0  | 1.2  | 20.5 | 131.1 | C39 H43 N3 O Na P Au      |
| 820.2707 | 820.2707   | 1.0  | 1.2  | 29.5 | 14.0  | C49 H44 N3 O5 P Cl        |
| 820.2727 | 820.2727   | -1.0 | -1.2 | 7.5  | 7.2   | C28 H47 N5 O7 Na Cl Au    |
| 820.2728 | 820.2728   | -1.1 | -1.3 | 1.5  | 18.9  | C23 H51 N5 O10 P Cl Au    |
| 820.2705 | 820.2705   | 1.2  | 1.5  | 35.5 | 108.3 | C53 H40 N3 O3 Na P        |
| 820.2729 | 820.2729   | -1.2 | -1.5 | 38.5 | 107.7 | C55 H39 N3 O3 P           |
| 820.2729 | 820.2729   | -1.2 | -1.5 | 44.5 | 110.5 | C60 H35 N3 Na             |
| 820.2704 | 820.2704   | 1.3  | 1.6  | 39.5 | 23.8  | C52 H35 N9 Cl             |
| 820.2704 | 820.2704   | 1.3  | 1.6  | -1.5 | 26.0  | C21 H52 N5 O10 Na P Cl Au |
| 820.2731 | 820.2731   | -1.4 | -1.7 | 30.5 | 106.2 | C45 H38 N7 O9             |
| 820.2703 | 820.2703   | 1.4  | 1.7  | 8.5  | 173.8 | C28 H44 N O2 Au2          |
| 820.2731 | 820.2731   | -1.4 | -1.7 | 23.5 | 126.3 | C41 H42 N3 O P Au         |
| 820.2731 | 820.2731   | -1.4 | -1.7 | 38.5 | 28.7  | C56 H39 N3 O2 Cl          |
| 820.2702 | 820.2702   | 1.5  | 1.8  | 39.5 | 110.5 | C51 H35 N9 O P            |
| 820.2701 | 820.2701   | 1.6  | 2.0  | 23.5 | 121.0 | C42 H41 N O4 Au           |
| 820.2733 | 820.2733   | -1.6 | -2.0 | 23.5 | 4.2   | C42 H42 N3 Cl Au          |
| 820.2733 | 820.2733   | -1.6 | -2.0 | 15.5 | 142.2 | C31 H41 N7 O7 Au          |
| 820.2735 | 820.2735   | -1.8 | -2.2 | 0.5  | 223.4 | C17 H44 N7 O5 Au2         |
| 820.2699 | 820.2699   | 1.8  | 2.2  | 38.5 | 104.4 | C56 H38 N O6              |
| 820.2736 | 820.2736   | -1.9 | -2.3 | 11.5 | 138.4 | C33 H46 N O9 Na Au        |
| 820.2737 | 820.2737   | -2.0 | -2.4 | 27.5 | 113.3 | C42 H40 N9 O6 Na P        |
| 820.2696 | 820.2696   | 2.1  | 2.6  | 31.5 | 14.5  | C48 H41 N7 O Na P Cl      |
| 820.2739 | 820.2739   | -2.2 | -2.7 | 21.5 | 2.0   | C38 H44 N9 O8 P Cl        |
| 820.2739 | 820.2739   | -2.2 | -2.7 | 12.5 | 157.3 | C28 H43 N9 O4 Na P Au     |
| 820.2739 | 820.2739   | -2.2 | -2.7 | 27.5 | 7.4   | C43 H40 N9 O5 Na Cl       |
| 820.2695 | 820.2695   | 2.2  | 2.7  | 4.5  | 22.3  | C23 H45 N5 Cl Au2         |
| 820.2693 | 820.2693   | 2.4  | 2.9  | 11.5 | 156.8 | C26 H41 N9 O9 Au          |
| 820.2741 | 820.2741   | -2.4 | -2.9 | 6.5  | 13.4  | C24 H47 N9 O6 P Cl Au     |
| 820.2693 | 820.2693   | 2.4  | 2.9  | 4.5  | 202.6 | C22 H45 N5 O P Au2        |
| 820.2741 | 820.2741   | -2.4 | -2.9 | 12.5 | 4.6   | C29 H43 N9 O3 Na Cl Au    |
| 820.2693 | 820.2693   | 2.4  | 2.9  | 19.5 | 1.4   | C37 H42 N5 O2 Cl Au       |
| 820.2742 | 820.2742   | -2.5 | -3.0 | 17.5 | 2.1   | C40 H49 N3 O10 Na P Cl    |
| 820.2691 | 820.2691   | 2.6  | 3.2  | 34.5 | 19.1  | C51 H39 N5 O4 Cl          |
| 820.2691 | 820.2691   | 2.6  | 3.2  | 19.5 | 134.4 | C36 H42 N5 O3 P Au        |
| 820.2691 | 820.2691   | 2.6  | 3.2  | 25.5 | 126.4 | C41 H38 N5 Na Au          |



| Parameter                | Value       |
|--------------------------|-------------|
| 1 Title                  | zhixun-3-L8 |
| 2 Solvent                | CDCl3       |
| 3 Spectrometer Frequency | 499.86      |

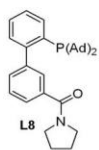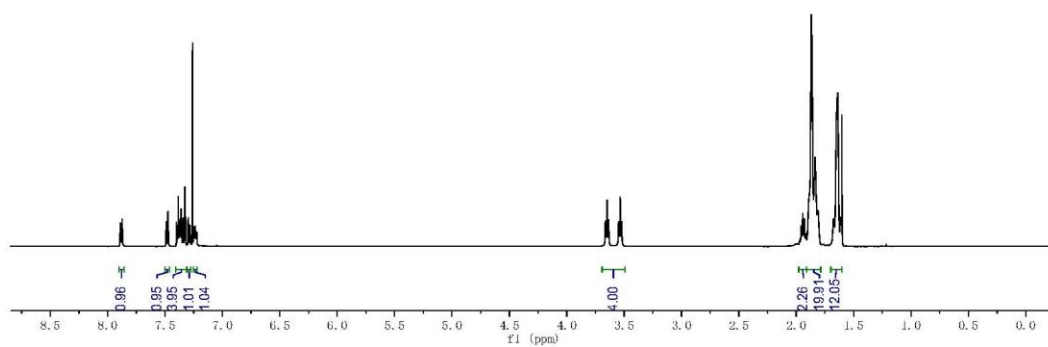

Supplementary Figure 57. <sup>1</sup>H NMR spectrum of L8.

Parameter Value  
Title wyz7-296-5-cl3  
Solvent CDCl3  
Spectrometer Frequency 125.70  
Nucleus 13C

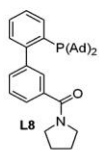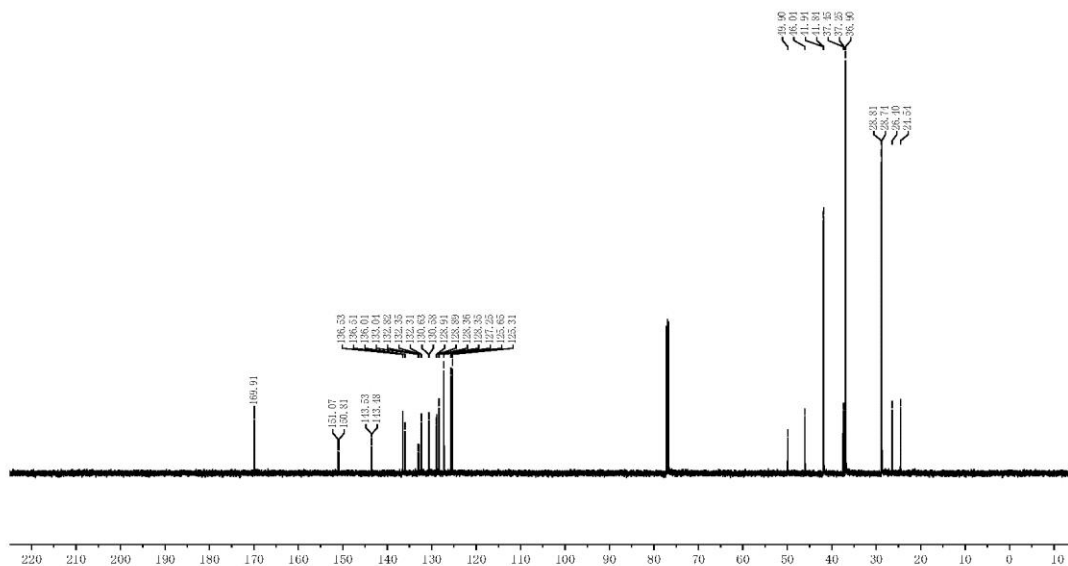

Supplementary Figure 58.  $^{13}\text{C}$  NMR spectrum of L8.

Parameter Value  
Title wyz7-296-5-p31  
Solvent cdcl3  
Spectrometer Frequency 161.90  
Nucleus 31P

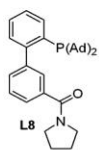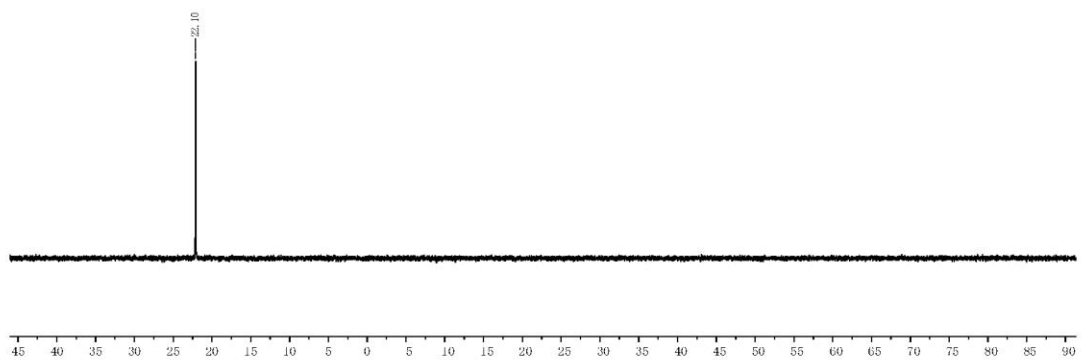

Supplementary Figure 59.  $^{31}\text{P}$  NMR spectrum of L8.



Single Mass Analysis

Tolerance = 3.0 mDa / DBE: min = -1.5, max = 50.0

Selected filters: None

Monoisotopic Mass, Even Electron Ions

4323 formula(e) evaluated with 20 results within limits (all results (up to 1000) for each mass)

Elements Used:

C: 0-100 H: 0-100 N: 0-10 O: 0-10 Na: 0-1 P: 0-2

WangZhang, wylL8, mw 551; ESI+

ZHA102213MH 451 (8.367) Cn (Cen,4, 60.00, Ar); Sm (SG, 4x3.00); Cm (451:519)

UCSB CHEM BIOCHEM QTOF2  
TOF MS ES+  
9.53e3

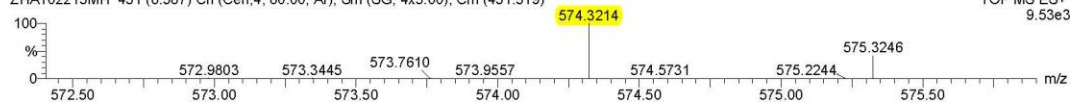

Minimum: -1.5  
Maximum: 3.0 10.0 50.0

| Mass     | Calc. Mass | mDa  | PPM  | DBE  | i-FIT     | Formula             |
|----------|------------|------|------|------|-----------|---------------------|
| 574.3214 | 574.3215   | -0.1 | -0.2 | 9.5  | 2779574.0 | C32 H50 N O4 P2     |
|          | 574.3215   | -0.1 | -0.2 | 15.5 | 2779617.8 | C37 H46 N O Na P    |
|          | 574.3217   | -0.3 | -0.5 | 1.5  | 2779490.3 | C22 H49 N5 O10 P    |
|          | 574.3217   | -0.3 | -0.5 | 7.5  | 2779543.8 | C27 H45 N5 O7 Na    |
|          | 574.3222   | -0.8 | -1.4 | 23.5 | 2779656.3 | C41 H40 N3          |
|          | 574.3206   | 0.8  | 1.4  | 3.5  | 2779408.0 | C21 H46 N9 O6 Na P  |
|          | 574.3223   | -0.9 | -1.6 | -1.5 | 2779343.8 | C19 H51 N7 O7 Na P2 |
|          | 574.3204   | 1.0  | 1.7  | 11.5 | 2779534.0 | C31 H47 N5 Na P2    |
|          | 574.3201   | 1.3  | 2.3  | 6.5  | 2779527.5 | C24 H44 N7 O9       |
|          | 574.3228   | -1.4 | -2.4 | 14.5 | 2779572.5 | C33 H46 N5 P2       |
|          | 574.3199   | 1.5  | 2.6  | 14.5 | 2779603.0 | C34 H45 N3 O3 P     |
|          | 574.3198   | 1.6  | 2.8  | 20.5 | 2779639.8 | C39 H41 N3 Na       |
|          | 574.3230   | -1.6 | -2.8 | 12.5 | 2779536.5 | C28 H41 N9 O3 Na    |
|          | 574.3230   | -1.6 | -2.8 | 6.5  | 2779468.5 | C23 H45 N9 O6 P     |
|          | 574.3233   | -1.9 | -3.3 | 2.5  | 2779507.0 | C25 H50 N3 O8 Na P  |
|          | 574.3193   | 2.1  | 3.7  | -1.5 | 2779443.0 | C20 H50 N5 O10 Na P |
|          | 574.3191   | 2.3  | 4.0  | 6.5  | 2779539.0 | C30 H51 N O4 Na P2  |
|          | 574.3239   | -2.5 | -4.4 | 18.5 | 2779639.3 | C39 H45 N O P       |
|          | 574.3188   | 2.6  | 4.5  | 10.5 | 2779509.0 | C28 H46 N7 O2 P2    |
|          | 574.3241   | -2.7 | -4.7 | 10.5 | 2779577.3 | C29 H44 N5 O7       |

Supplementary Figure 60. HRMS of L8.

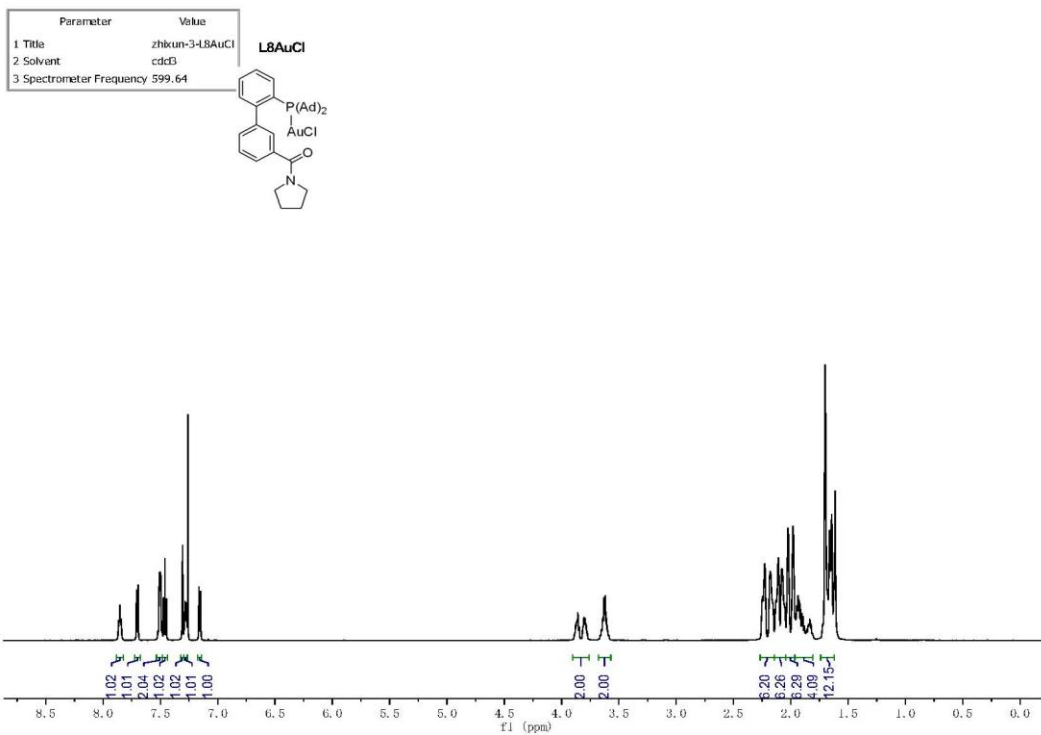

**Supplementary Figure 61.  $^1\text{H}$  NMR spectrum of L8AuCl.**

Parameter Value  
Title wy28-L9AuCl-C13  
Solvent CDCl3  
Spectrometer Frequency 125.70  
Nucleus 13C

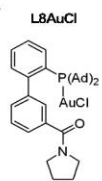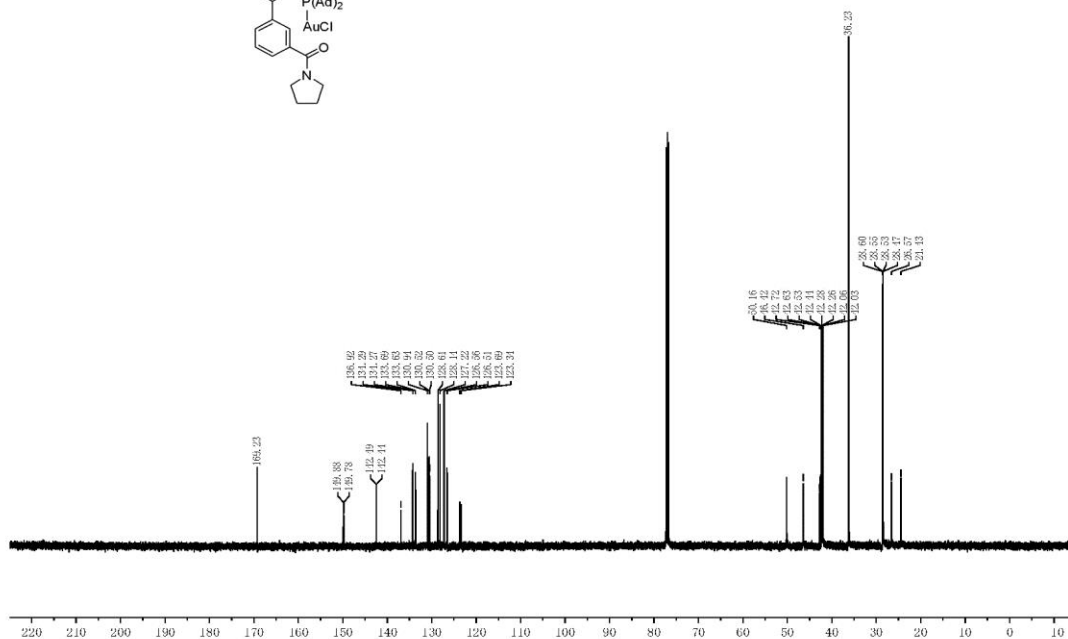

Supplementary Figure 62.  $^{13}\text{C}$  NMR spectrum of L8AuCl.

| Parameter              | Value             |
|------------------------|-------------------|
| Title                  | wyz8-L8AuCl-P31   |
| Solvent                | cdCl <sub>3</sub> |
| Spectrometer Frequency | 161.90            |
| Nucleus                | <sup>31</sup> P   |

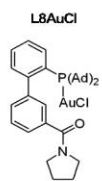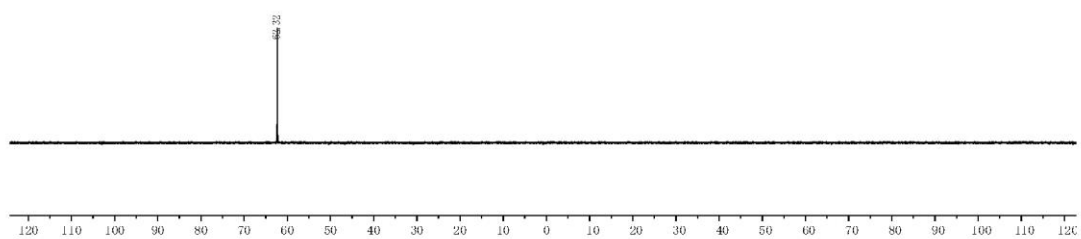

**Supplementary Figure 63. <sup>31</sup>P NMR spectrum of L8AuCl.**

Single Mass Analysis

Tolerance = 3.0 mDa / DBE: min = -1.5, max = 50.0

Selected filters: None

Monoisotopic Mass, Even Electron Ions

19330 formula(e) evaluated with 62 results within limits (all results (up to 1000) for each mass)

Elements Used:

C: 0-100 H: 0-100 N: 0-10 O: 0-10 Na: 0-1 P: 0-1 Cl: 0-1 Au: 0-4

Wang/Zhang, wylL8AuCl, mw 783; ESI+

ZHA102213MP 12 (0.234) Cn (Cen,4, 60.00, Ar); Sm (SG, 4x3.00); Cm (1:195)

UCSB CHEM BIOCHEM QTOF2

TOF MS ES+

2.24e3

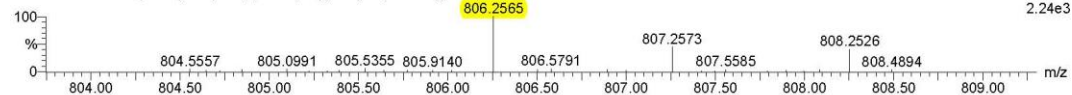

Minimum: -1.5  
Maximum: 50.0

| Mass     | Calc. Mass | mDa  | PPM  | DBE  | i-FIT | Formula                   |
|----------|------------|------|------|------|-------|---------------------------|
| 806.2565 | 806.2564   | 0.1  | 0.1  | 34.5 | 25.1  | C49 H38 N7 O P Cl         |
|          | 806.2567   | -0.2 | -0.2 | 22.5 | 208.4 | C40 H42 N5 O10 Na P       |
|          | 806.2567   | -0.2 | -0.2 | 30.5 | 26.3  | C51 H43 N O3 Na P Cl      |
|          | 806.2569   | -0.4 | -0.5 | 15.5 | 1.8   | C37 H46 N O Na P Cl Au    |
|          | 806.2569   | -0.4 | -0.5 | 7.5  | 345.2 | C26 H45 N5 O8 Na P Au     |
|          | 806.2569   | -0.4 | -0.5 | 22.5 | 4.6   | C41 H42 N5 O9 Na Cl       |
|          | 806.2561   | 0.4  | 0.5  | 3.5  | 65.5  | C21 H46 N9 O6 Na P Cl Au  |
|          | 806.2571   | -0.6 | -0.7 | 1.5  | 66.9  | C22 H49 N5 O10 P Cl Au    |
|          | 806.2571   | -0.6 | -0.7 | 7.5  | 30.6  | C27 H45 N5 O7 Na Cl Au    |
|          | 806.2558   | 0.7  | 0.9  | 18.5 | 2.3   | C35 H43 N9 O8 Na P Cl     |
|          | 806.2572   | -0.7 | -0.9 | 44.5 | 186.5 | C59 H33 N3 Na             |
|          | 806.2558   | 0.7  | 0.9  | 28.5 | 231.3 | C42 H35 N5 Au             |
|          | 806.2573   | -0.8 | -1.0 | 38.5 | 183.7 | C54 H37 N3 O3 P           |
|          | 806.2556   | 0.9  | 1.1  | 43.5 | 183.1 | C56 H32 N5 O2             |
|          | 806.2574   | -0.9 | -1.1 | 38.5 | 46.0  | C55 H37 N3 O2 Cl          |
|          | 806.2555   | 1.0  | 1.2  | 6.5  | 45.7  | C24 H44 N7 O9 Cl Au       |
|          | 806.2575   | -1.0 | -1.2 | 23.5 | 244.2 | C40 H40 N3 O P Au         |
|          | 806.2575   | -1.0 | -1.2 | 30.5 | 189.9 | C44 H36 N7 O9             |
|          | 806.2555   | 1.0  | 1.2  | -0.5 | 98.2  | C20 H48 N3 O P Cl Au2     |
|          | 806.2576   | -1.1 | -1.4 | 23.5 | 1.6   | C41 H40 N3 Cl Au          |
|          | 806.2553   | 1.2  | 1.5  | 6.5  | 367.9 | C23 H44 N7 O10 P Au       |
|          | 806.2553   | 1.2  | 1.5  | 14.5 | 5.7   | C34 H45 N3 O3 P Cl Au     |
|          | 806.2553   | 1.2  | 1.5  | 12.5 | 317.4 | C28 H40 N7 O7 Na Au       |
|          | 806.2577   | -1.2 | -1.5 | 15.5 | 295.5 | C30 H39 N7 O7 Au          |
|          | 806.2552   | 1.3  | 1.6  | 20.5 | 0.5   | C39 H41 N3 Na Cl Au       |
|          | 806.2551   | 1.4  | 1.7  | 20.5 | 258.4 | C38 H41 N3 O Na P Au      |
|          | 806.2551   | 1.4  | 1.7  | 29.5 | 18.5  | C48 H42 N3 O5 P Cl        |
|          | 806.2579   | -1.4 | -1.7 | 0.5  | 508.5 | C16 H42 N7 O5 Au2         |
|          | 806.2579   | -1.4 | -1.7 | 11.5 | 286.5 | C32 H44 N O9 Na Au        |
|          | 806.2550   | 1.5  | 1.9  | 27.5 | 198.1 | C42 H37 N7 O9 Na          |
|          | 806.2550   | 1.5  | 1.9  | 35.5 | 36.7  | C53 H38 N3 O2 Na Cl       |
|          | 806.2580   | -1.5 | -1.9 | 27.5 | 209.4 | C41 H38 N9 O6 Na P        |
|          | 806.2549   | 1.6  | 2.0  | 35.5 | 186.8 | C52 H38 N3 O3 Na P        |
|          | 806.2582   | -1.7 | -2.1 | 12.5 | 334.9 | C27 H41 N9 O4 Na P Au     |
|          | 806.2582   | -1.7 | -2.1 | 27.5 | 7.4   | C42 H38 N9 O5 Na Cl       |
|          | 806.2547   | 1.8  | 2.2  | 8.5  | 378.2 | C27 H42 N O2 Au2          |
|          | 806.2547   | 1.8  | 2.2  | -1.5 | 86.4  | C20 H50 N5 O10 Na P Cl Au |
|          | 806.2583   | -1.8 | -2.2 | 21.5 | 2.2   | C37 H42 N9 O8 P Cl        |
|          | 806.2547   | 1.8  | 2.2  | 39.5 | 35.4  | C51 H33 N9 Cl             |
|          | 806.2546   | 1.9  | 2.4  | 39.5 | 192.0 | C50 H33 N9 O P            |
|          | 806.2584   | -1.9 | -2.4 | 12.5 | 19.5  | C28 H41 N9 O3 Na Cl Au    |
|          | 806.2585   | -2.0 | -2.5 | 6.5  | 49.0  | C23 H45 N9 O6 P Cl Au     |
|          | 806.2545   | 2.0  | 2.5  | 23.5 | 231.2 | C41 H39 N O4 Au           |
|          | 806.2585   | -2.0 | -2.5 | 17.5 | 2.8   | C39 H47 N3 O10 Na P Cl    |
|          | 806.2587   | -2.2 | -2.7 | 2.5  | 48.0  | C25 H50 N3 O8 Na P Cl Au  |
|          | 806.2543   | 2.2  | 2.7  | 38.5 | 176.2 | C55 H36 N O6              |
|          | 806.2589   | -2.4 | -3.0 | 39.5 | 186.1 | C57 H38 N O Na P          |
|          | 806.2540   | 2.5  | 3.1  | 31.5 | 18.0  | C47 H39 N7 O Na P Cl      |
|          | 806.2590   | -2.5 | -3.1 | 39.5 | 57.0  | C58 H38 N Na Cl           |
|          | 806.2591   | -2.6 | -3.2 | 33.5 | 34.8  | C53 H42 N O3 P Cl         |
|          | 806.2591   | -2.6 | -3.2 | 25.5 | 198.4 | C42 H41 N5 O10 P          |
|          | 806.2591   | -2.6 | -3.2 | 31.5 | 187.8 | C47 H37 N5 O7 Na          |
|          | 806.2538   | 2.7  | 3.3  | 4.5  | 71.4  | C22 H43 N5 Cl Au2         |

## Single Mass Analysis

Tolerance = 3.0 mDa / DBE: min = -1.5, max = 50.0

Selected filters: None

Monoisotopic Mass, Even Electron Ions

19330 formula(e) evaluated with 62 results within limits (all results (up to 1000) for each mass)

Elements Used:

C: 0-100 H: 0-100 N: 0-10 O: 0-10 Na: 0-1 P: 0-1 Cl: 0-1 Au: 0-4

Wang/Zhang, wylL8AuCl, mw 783; ESI+

ZHA102213MP 12 (0.234) Cn (Cen, 4, 60.00, Ar); Sm (SG, 4x3.00); Cm (1;195)

UCSB CHEM BIOCHEM QTOF2

TOF MS ES+

2.24e3

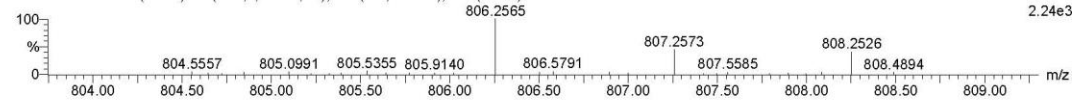

Minimum: -1.5  
Maximum: 50.0

| Mass     | Calc. Mass | mDa  | PPM  | DBE   | i-FIT                | Formula |
|----------|------------|------|------|-------|----------------------|---------|
| 806.2593 | -2.8       | -3.5 | 16.5 | 280.5 | C33 H40 N5 O5 Na Au  |         |
| 806.2593 | -2.8       | -3.5 | 18.5 | 0.9   | C39 H45 N O P Cl Au  |         |
| 806.2593 | -2.8       | -3.5 | 10.5 | 320.7 | C28 H44 N5 O8 P Au   |         |
| 806.2593 | -2.8       | -3.5 | 25.5 | 8.4   | C43 H41 N5 O9 Cl     |         |
| 806.2536 | 2.9        | 3.6  | 19.5 | 1.7   | C36 H40 N5 O2 Cl Au  |         |
| 806.2536 | 2.9        | 3.6  | 4.5  | 453.3 | C21 H43 N5 O P Au2   |         |
| 806.2536 | 2.9        | 3.6  | 11.5 | 337.2 | C25 H39 N9 O9 Au     |         |
| 806.2595 | -3.0       | -3.7 | 1.5  | 477.1 | C19 H43 N5 O3 Na Au2 |         |
| 806.2595 | -3.0       | -3.7 | 10.5 | 20.6  | C29 H44 N5 O7 Cl Au  |         |

## Supplementary Figure 64. HRMS of L8AuCl.

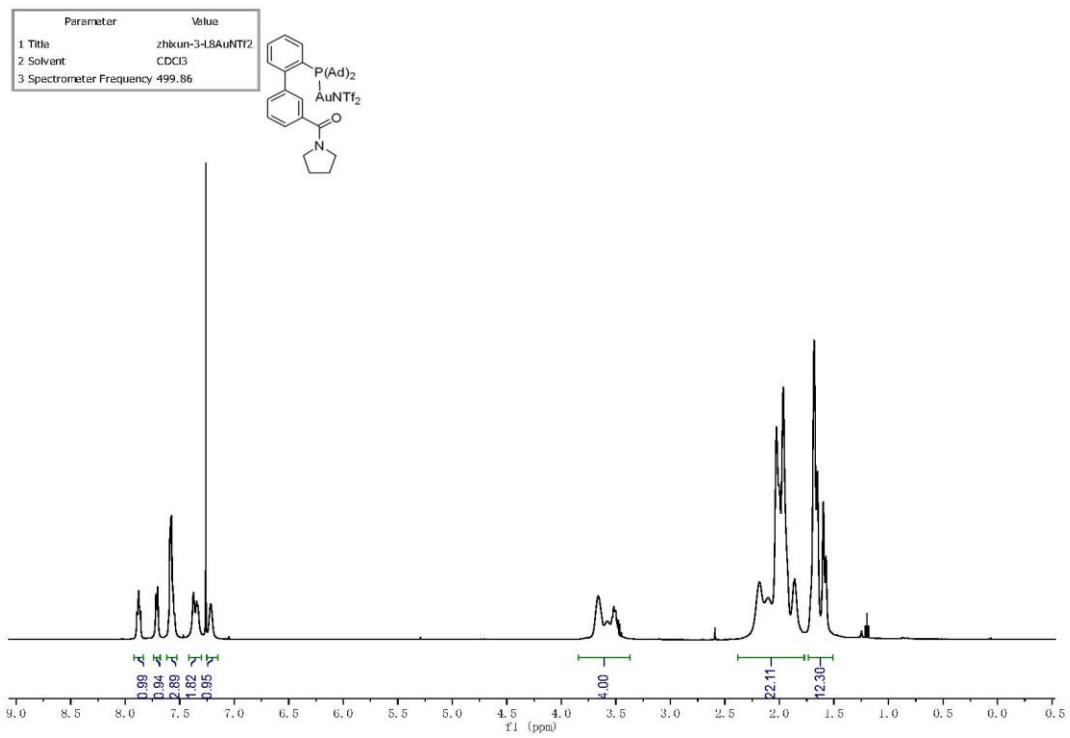

Supplementary Figure 65. <sup>1</sup>H NMR spectrum of L8AuNTf<sub>2</sub>.

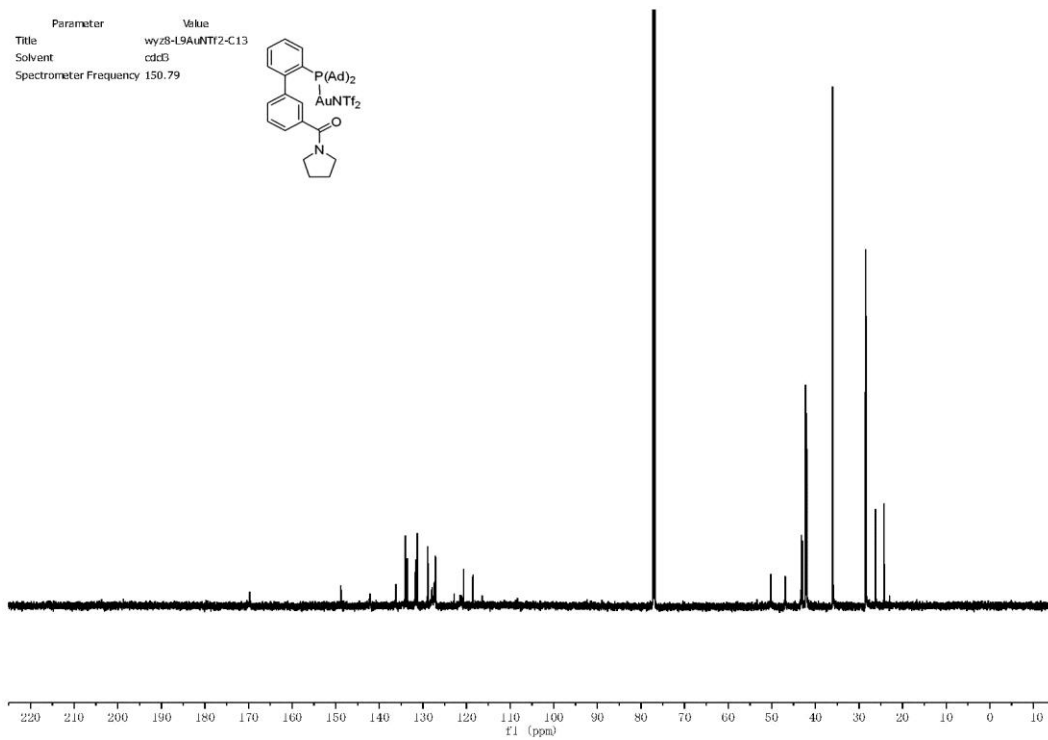

Supplementary Figure 66.  $^{13}\text{C}$  NMR spectrum of L8AuNTf<sub>2</sub>.



Parameter Value  
Title wvz8-L8AuNTf2-P31-5  
Solvent cdcl3  
Spectrometer Frequency 161.90

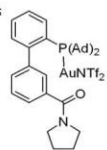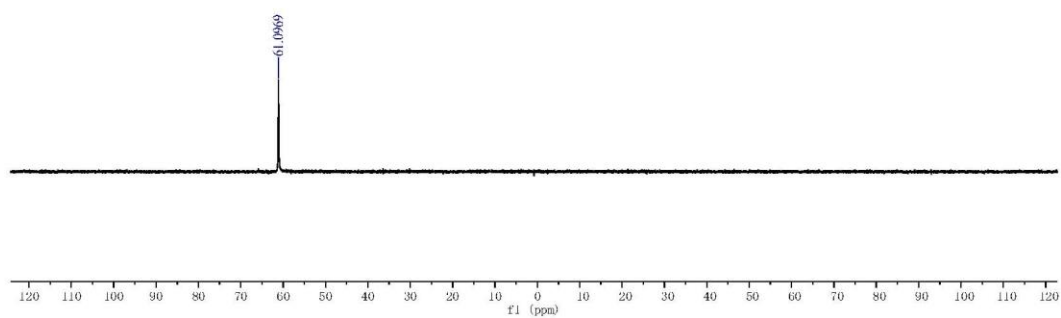

Supplementary Figure 67.  $^{31}\text{P}$  NMR spectrum of L8AuNTf<sub>2</sub>.

(a)

### Elemental Composition Report

Page 1

#### Single Mass Analysis

Tolerance = 3.0 mDa / DBE: min = -1.5, max = 50.0

Selected filters: None

Monoisotopic Mass, Even Electron Ions

4563 formula(e) evaluated with 16 results within limits (all results (up to 1000) for each mass)

Elements Used:

C: 0-100 H: 0-100 N: 0-10 O: 0-10 P: 0-1 Au: 0-4

Wang/Zhang, wxL8AuNTF2, mw 1028; ESI+  
ZHA103113MD 91 (1.732) Cn (Cen,4, 60.00, Ar); Sm (SG, 4x3.00); Cm (76.93) UCSB CHEM BIOCHEM QTOF2  
TOF MS ES+  
2.08e3

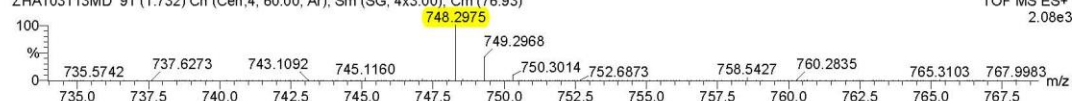

Minimum: -1.5  
Maximum: 3.0 10.0 50.0

| Mass     | Calc. Mass | mDa  | PPM  | DBE  | i-FIT | Formula             |
|----------|------------|------|------|------|-------|---------------------|
| 748.2975 | 748.2974   | 0.1  | 0.1  | 4.5  | 58.6  | C21 H46 N9 O6 P Au  |
|          | 748.2972   | 0.3  | 0.4  | 19.5 | 3.2   | C35 H43 N9 O8 P     |
|          | 748.2981   | -0.6 | -0.8 | 31.5 | 70.6  | C51 H43 N O3 P      |
|          | 748.2983   | -0.8 | -1.1 | 23.5 | 20.8  | C41 H42 N5 O9       |
|          | 748.2983   | -0.8 | -1.1 | 16.5 | 0.2   | C37 H46 N O P Au    |
|          | 748.2966   | 0.9  | 1.2  | 21.5 | 2.4   | C39 H41 N3 Au       |
|          | 748.2985   | -1.0 | -1.3 | 8.5  | 20.7  | C27 H45 N5 O7 Au    |
|          | 748.2964   | 1.1  | 1.5  | 36.5 | 92.3  | C53 H38 N3 O2       |
|          | 748.2961   | 1.4  | 1.9  | -0.5 | 73.6  | C20 H50 N5 O10 P Au |
|          | 748.2954   | 2.1  | 2.8  | 32.5 | 49.3  | C47 H39 N7 O P      |
|          | 748.2996   | -2.1 | -2.8 | 28.5 | 27.0  | C42 H38 N9 O5       |
|          | 748.2998   | -2.3 | -3.1 | 13.5 | 13.6  | C28 H41 N9 O3 Au    |
|          | 748.2999   | -2.4 | -3.2 | 18.5 | 11.1  | C39 H47 N3 O10 P    |
|          | 748.3000   | -2.5 | -3.3 | -1.5 | 166.1 | C14 H44 N9 O Au2    |
|          | 748.3001   | -2.6 | -3.5 | 3.5  | 37.0  | C25 H50 N3 O8 P Au  |
|          | 748.3004   | -2.9 | -3.9 | 40.5 | 132.5 | C58 H38 N           |

(b)

### Elemental Composition Report

Page 1

#### Single Mass Analysis

Tolerance = 3.0 mDa / DBE: min = -1.5, max = 50.0

Selected filters: None

Monoisotopic Mass, Even Electron Ions

4960 formula(e) evaluated with 17 results within limits (all results (up to 1000) for each mass)

Elements Used:

C: 0-100 H: 0-100 N: 0-10 O: 0-10 S: 0-4 F: 0-10

Wang/Zhang, wxL8AuNTF2, mw 1028; ESI-  
ZHA103113MD1 881 (16.516) AM (Cen,4, 50.00, Ar,8000.0,0.00,0.70); Cm (881.998) UCSB CHEM BIOCHEM QTOF2  
TOF MS ES-  
5.32e3

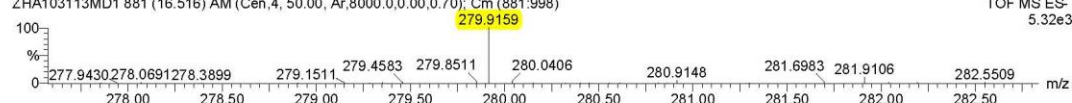

Minimum: -1.5  
Maximum: 3.0 10.0 50.0

| Mass     | Calc. Mass | mDa  | PPM  | DBE  | i-FIT | Formula           |
|----------|------------|------|------|------|-------|-------------------|
| 279.9159 | 279.9159   | 0.0  | 0.0  | 0.5  | 29.7  | C3 H N S3 F7      |
|          | 279.9161   | -0.2 | -0.7 | 11.5 | 453.6 | C11 N S3 F2       |
|          | 279.9157   | 0.2  | 0.7  | 6.5  | 137.6 | C5 H2 N3 O5 S3    |
|          | 279.9154   | 0.5  | 1.8  | 2.5  | 149.0 | C3 H4 N3 O2 S4 F2 |
|          | 279.9166   | -0.7 | -2.5 | -1.5 | 113.2 | H5 N3 O3 S4 F3    |
|          | 279.9168   | -0.9 | -3.2 | 2.5  | 42.9  | C2 H3 N3 O6 S3 F  |
|          | 279.9146   | 1.3  | 4.6  | 3.5  | 4.5   | C2 N3 O7 S2 F2    |
|          | 279.9172   | -1.3 | -4.6 | 7.5  | 253.6 | C8 H N O S3 F3    |
|          | 279.9173   | -1.4 | -5.0 | 0.5  | 2.8   | C2 N O4 S2 F6     |
|          | 279.9144   | 1.5  | 5.4  | -0.5 | 29.6  | H2 N3 O4 S3 F4    |
|          | 279.9143   | 1.6  | 5.7  | 6.5  | 268.5 | C6 H3 N3 O S4 F   |
|          | 279.9182   | -2.3 | -8.2 | 2.5  | 1.9   | C H2 N3 O10 S2    |
|          | 279.9184   | -2.5 | -8.9 | 3.5  | 99.5  | C5 H2 N O2 S3 F4  |
|          | 279.9132   | 2.7  | 9.6  | 10.5 | 441.1 | C9 H2 N3 S4       |
|          | 279.9132   | 2.7  | 9.6  | 3.5  | 55.4  | C3 H N3 O3 S3 F3  |
|          | 279.9186   | -2.7 | -9.6 | 7.5  | 161.0 | C7 N O5 S2 F2     |
|          | 279.9130   | 2.9  | 10.4 | -0.5 | 101.4 | C H3 N3 S4 F5     |

Supplementary Figure 68. HRMS of (a) [L8Au], (b) [NTF<sub>2</sub>].

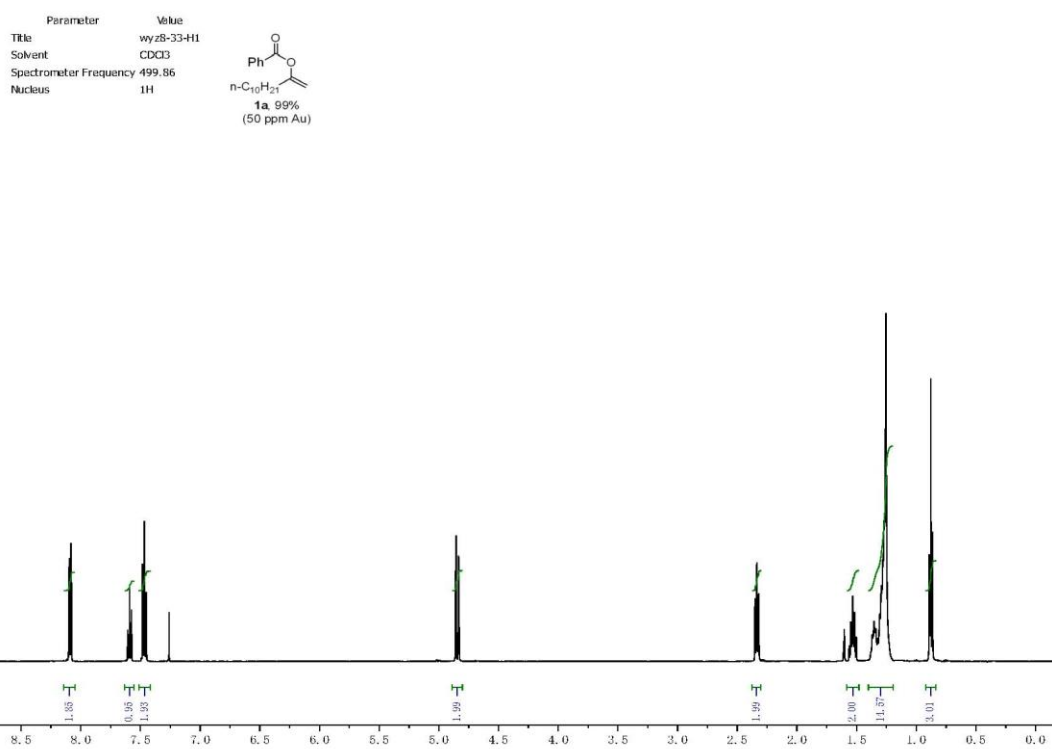

Supplementary Figure 69. <sup>1</sup>H NMR spectrum of 1a.



Single Mass Analysis

Tolerance = 3.0 mDa / DBE: min = -1.5, max = 50.0

Selected filters: None

Monoisotopic Mass, Even Electron Ions

2040 formula(e) evaluated with 8 results within limits (all results (up to 1000) for each mass)

Elements Used:

C: 0-100 H: 0-100 N: 0-10 O: 0-10 Na: 0-1 Si: 0-2

Wang/Zhang, wyz1a, mw 288, ESI+

ZHA101413MA 1554 (28.809) Cn (Cen,4, 60.00, Ar); Sm (SG, 4x3.00); Cm (1402:1564)

UCSB CHEM BIOCHEM QTOF2  
TOF MS ES+  
1.62e4

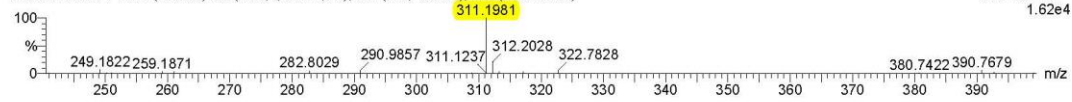

Minimum: -1.5  
Maximum: 3.0 10.0 50.0

| Mass     | Calc. Mass | mDa  | PPM  | DBE  | i-FIT  | Formula            |
|----------|------------|------|------|------|--------|--------------------|
| 311.1981 | 311.1984   | -0.3 | -1.0 | 9.5  | 18.7   | C17 H23 N6         |
|          | 311.1975   | 0.6  | 1.9  | 0.5  | 192.5  | C8 H27 N8 O3 Si    |
|          | 311.1987   | -0.6 | -1.9 | 5.5  | 6.2    | C19 H28 O2 Na      |
|          | 311.1975   | 0.6  | 1.9  | 3.5  | 1138.4 | C15 H31 N2 O Si2   |
|          | 311.1971   | 1.0  | 3.2  | 4.5  | 15.5   | C16 H27 N2 O4      |
|          | 311.1992   | -1.1 | -3.5 | 1.5  | 150.4  | C11 H28 N6 O Na Si |
|          | 311.2002   | -2.1 | -6.7 | -0.5 | 256.5  | C12 H31 N2 O5 Si   |
|          | 311.1960   | 2.1  | 6.7  | 6.5  | 50.6   | C15 H24 N6 Na      |

Supplementary Figure 71. HRMS of 1a.

Title wyz7-11-pro-h1  
Solvent CDCl3  
Spectrometer Frequency 499.86

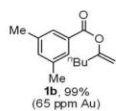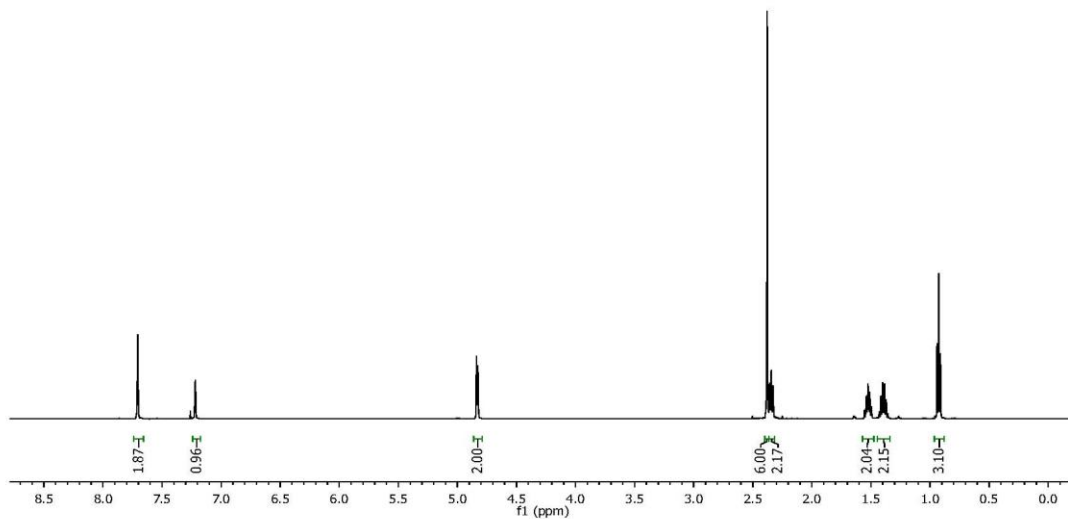

Supplementary Figure 72. <sup>1</sup>H NMR spectrum of 1b.

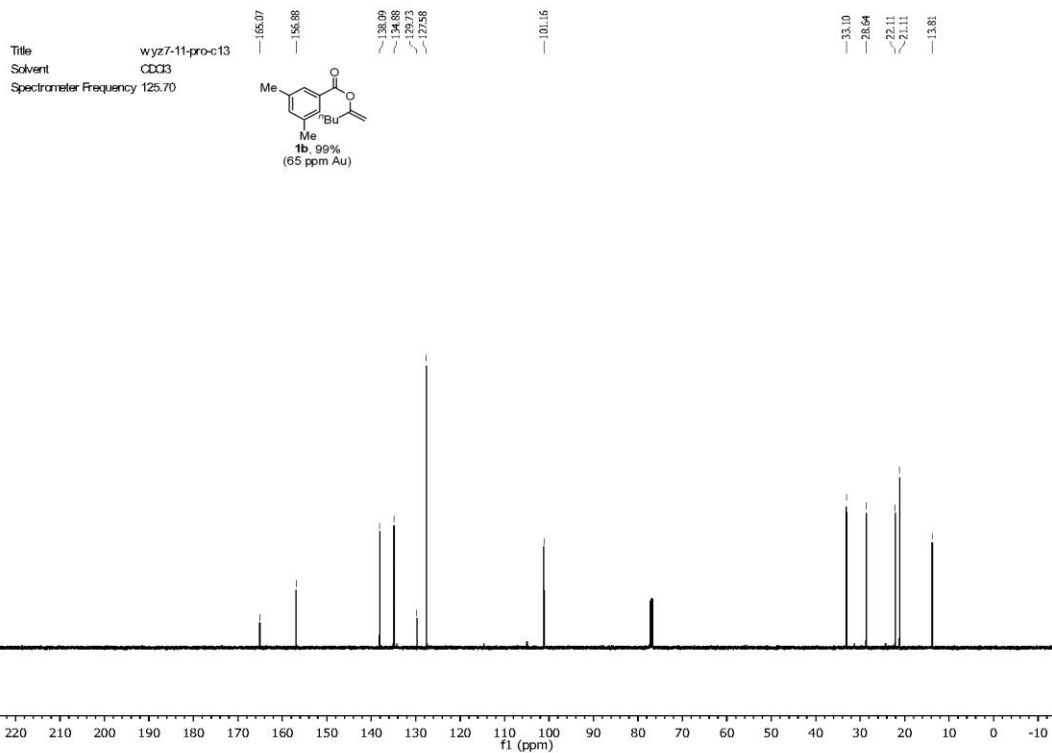

Supplementary Figure 73. <sup>13</sup>C NMR spectrum of **1b**.

## Single Mass Analysis

Tolerance = 3.0 mDa / DBE: min = -1.5, max = 50.0

Selected filters: None

Monoisotopic Mass, Even Electron Ions

558 formula(e) evaluated with 6 results within limits (all results (up to 1000) for each mass)

Elements Used:

C: 0-100 H: 0-100 N: 0-10 O: 0-10 Na: 0-1

Wang/Zhang, wyz1b, mw 232, ESI+

ZHA101413MB1 365 (6.773) Cn (Cen,4, 60.00, Ar); Sm (SG, 4x3.00); Cm (269.370)

UCSB CHEM BIOCHEM QTOF2

TOF MS ES+

8.02e3

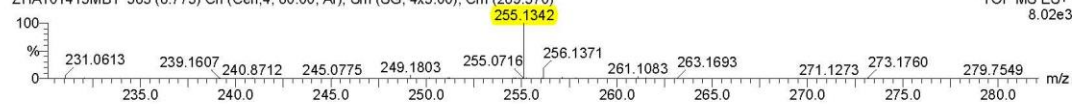

Minimum: -1.5  
 Maximum: 3.0 10.0 50.0

| Mass     | Calc. Mass | mDa  | PPM  | DBE | i-FIT | Formula          |
|----------|------------|------|------|-----|-------|------------------|
| 255.1342 | 255.1345   | -0.3 | -1.2 | 4.5 | 15.5  | C12 H19 N2 O4    |
|          | 255.1334   | 0.8  | 3.1  | 6.5 | 24.7  | C11 H16 N6 Na    |
|          | 255.1358   | -1.6 | -6.3 | 9.5 | 4.5   | C13 H15 N6       |
|          | 255.1361   | -1.9 | -7.4 | 5.5 | 2.0   | C15 H20 O2 Na    |
|          | 255.1321   | 2.1  | 8.2  | 1.5 | 54.1  | C10 H20 N2 O4 Na |
|          | 255.1318   | 2.4  | 9.4  | 5.5 | 66.3  | C8 H15 N8 O2     |

## Supplementary Figure 74. HRMS of 1b.



Title wyz7-34-h1  
Solvent cdcl3  
Spectrometer Frequency 599.64

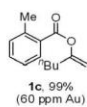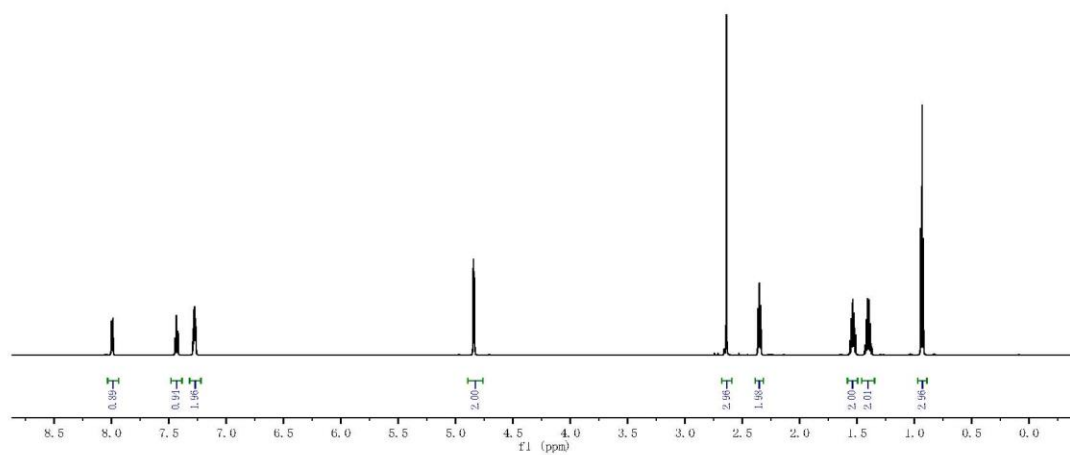

Supplementary Figure 75. <sup>1</sup>H NMR spectrum of 1c.

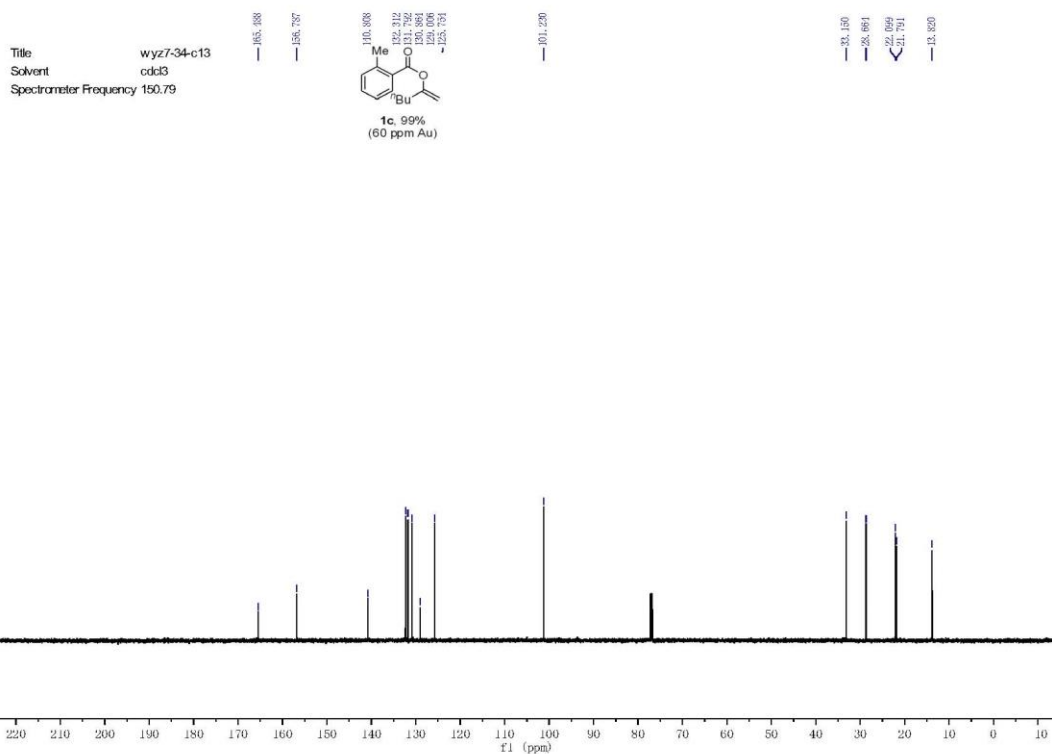

Supplementary Figure 76.  $^{13}\text{C}$  NMR spectrum of 1c.

## Single Mass Analysis

Tolerance = 3.0 mDa / DBE: min = -1.5, max = 50.0

Selected filters: None

Monoisotopic Mass, Even Electron Ions

505 formula(e) evaluated with 5 results within limits (all results (up to 1000) for each mass)

Elements Used:

C: 0-100 H: 0-100 N: 0-10 O: 0-10 Na: 0-1

Wang/Zhang, wyz1c, mw 218, ESI+

ZHA101413MC 240 (4.456) Cn (Cen,4, 60.00, Ar); Sm (SG, 4x3.00); Cm (41:243)

UCSB CHEM BIOCHEM QTOF2  
TOF MS ES+  
2.10e4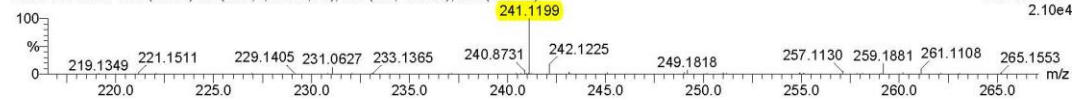

Minimum: -1.5  
Maximum: 50.0

| Mass     | Calc. Mass | mDa  | PPM   | DBE | i-FIT | Formula       |
|----------|------------|------|-------|-----|-------|---------------|
| 241.1199 | 241.1202   | -0.3 | -1.2  | 9.5 | 130.5 | C12 H13 N6    |
|          | 241.1204   | -0.5 | -2.1  | 5.5 | 82.3  | C14 H18 O2 Na |
|          | 241.1188   | 1.1  | 4.6   | 4.5 | 111.0 | C11 H17 N2 O4 |
|          | 241.1178   | 2.1  | 8.7   | 6.5 | 209.7 | C10 H14 N6 Na |
|          | 241.1229   | -3.0 | -12.4 | 8.5 | 91.7  | C16 H17 O2    |

Supplementary Figure 77. HRMS of 1c.

Title wyz7-35-h1  
Solvent cdcl3  
Spectrometer Frequency 599.64

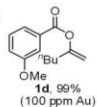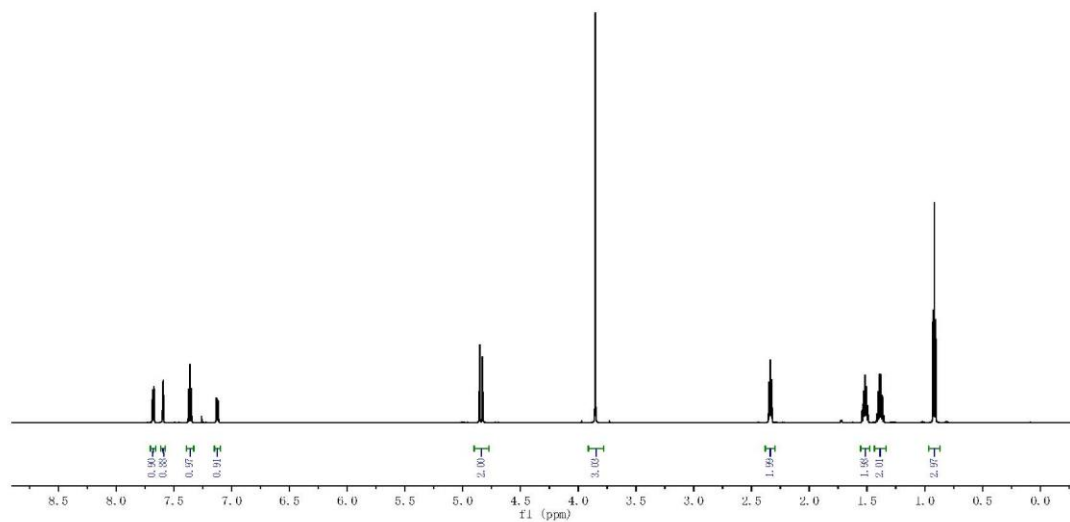

Supplementary Figure 78.  $^1\text{H}$  NMR spectrum of **1d**.

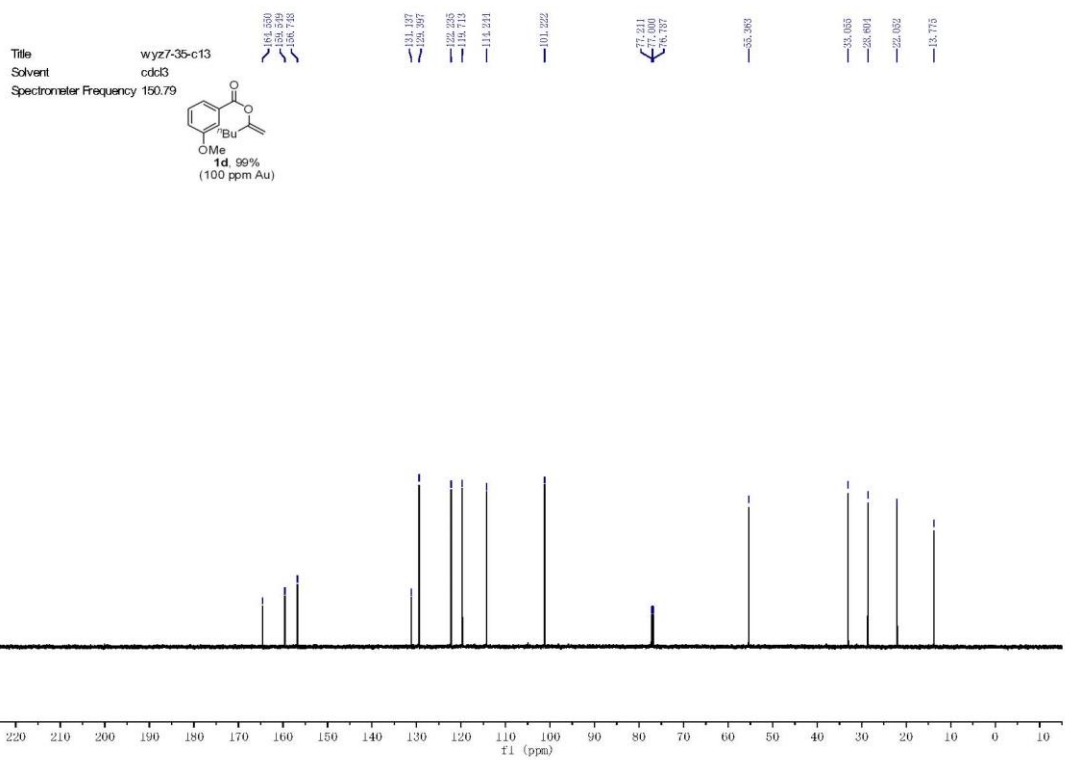

Supplementary Figure 79.  $^{13}\text{C}$  NMR spectrum of **1d**.

Single Mass Analysis

Tolerance = 3.0 mDa / DBE: min = -1.5, max = 50.0

Selected filters: None

Monoisotopic Mass, Even Electron Ions

63 formula(e) evaluated with 2 results within limits (all results (up to 1000) for each mass)

Elements Used:

C: 0-100 H: 0-100 O: 0-10 Na: 0-1

Wang/Zhang, wyz1d, mw 234, ESI+

ZHA101413MD2 210 (3.900) Cn (Cen, 4, 60.00, Ar); Sm (SG, 4x3.00); Cm (183.212)

UCSB CHEM BIOCHEM QTOF2  
TOF MS ES+  
3.09e3

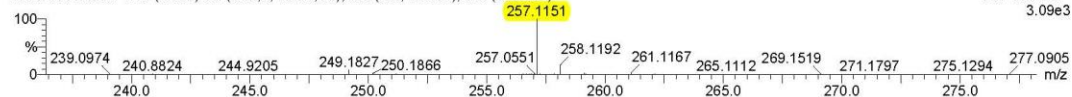

Minimum: -1.5  
Maximum: 3.0 10.0 50.0

| Mass     | Calc. Mass | mDa  | PPM   | DBE | i-FIT | Formula       |
|----------|------------|------|-------|-----|-------|---------------|
| 257.1151 | 257.1154   | -0.3 | -1.2  | 5.5 | 1.9   | C14 H18 O3 Na |
|          | 257.1178   | -2.7 | -10.5 | 8.5 | 2.2   | C16 H17 O3    |

Supplementary Figure 80. HRMS of 1d.

Title            wyz7-52-h1  
Solvent         CDCl3  
Spectrometer Frequency 499.86

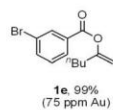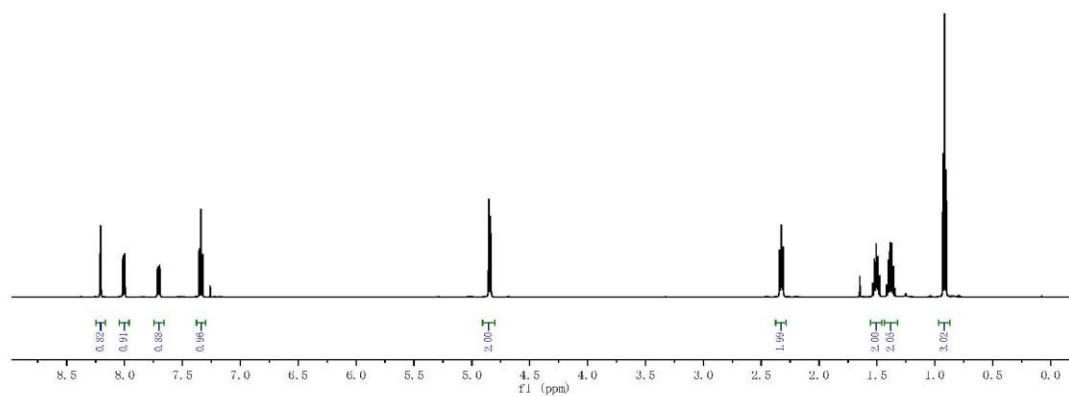

Supplementary Figure 81. <sup>1</sup>H NMR spectrum of **1e**.

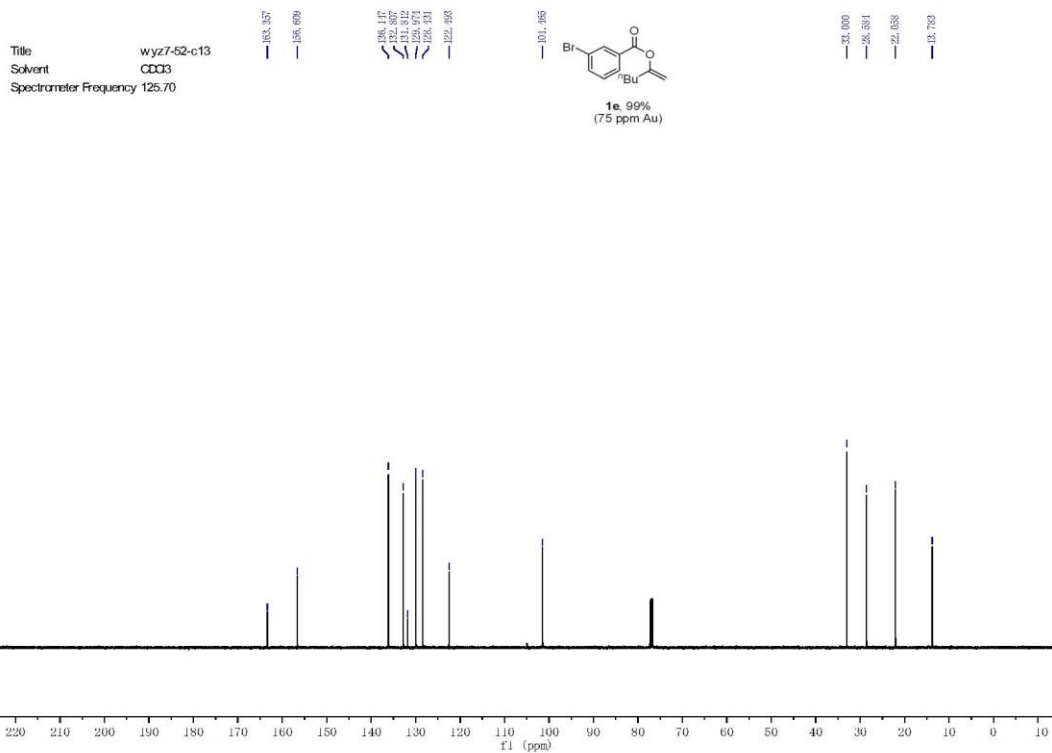

Supplementary Figure 82.  $^{13}\text{C}$  NMR spectrum of **1e**.



Single Mass Analysis

Tolerance = 3.0 mDa / DBE: min = -1.5, max = 50.0

Selected filters: None

Monoisotopic Mass, Even Electron Ions

1334 formula(e) evaluated with 12 results within limits (all results (up to 1000) for each mass)

Elements Used:

C: 0-100 H: 0-100 N: 0-10 O: 0-10 Na: 0-1 Br: 0-2

Wang/Zhang, wyz1e, mw 282, ESI+

ZHA101413ME 1038 (19.245) Cn (Cen,4, 60.00, Ar); Sm (SG, 4x3.00); Cm (873;1051)

UCSB CHEM BIOCHEM QTOF2

TOF MS ES+

3.77e3

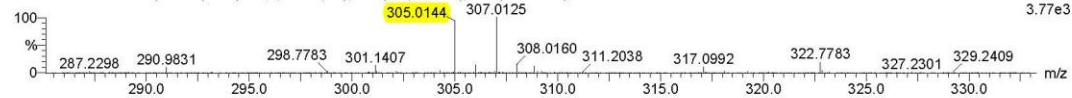

Minimum: -1.5  
Maximum: 50.0

| Mass     | Calc. Mass | mDa  | PPM  | DBE  | i-FIT  | Formula          |
|----------|------------|------|------|------|--------|------------------|
| 305.0144 | 305.0148   | -0.4 | -1.3 | 13.5 | 1834.2 | C10 H2 N8 O3 Na  |
|          | 305.0140   | 0.4  | 1.3  | 24.5 | 1877.2 | C23 H N2         |
|          | 305.0150   | -0.6 | -2.0 | 9.5  | 5.8    | C11 H10 N6 Br    |
|          | 305.0137   | 0.7  | 2.3  | 4.5  | 14.3   | C10 H14 N2 O4 Br |
|          | 305.0153   | -0.9 | -3.0 | 5.5  | 5.2    | C13 H15 O2 Na Br |
|          | 305.0134   | 1.0  | 3.3  | 8.5  | 1826.8 | C9 H6 N4 O7 Na   |
|          | 305.0131   | 1.3  | 4.3  | 12.5 | 1842.2 | C7 H N10 O5      |
|          | 305.0158   | -1.4 | -4.6 | 11.5 | 1809.7 | C11 H5 N4 O7     |
|          | 305.0126   | 1.8  | 5.9  | 6.5  | 14.8   | C9 H11 N6 Na Br  |
|          | 305.0118   | 2.6  | 8.5  | 7.5  | 1847.5 | C6 H5 N6 O9      |
|          | 305.0172   | -2.8 | -9.2 | 16.5 | 1827.8 | C12 H N8 O3      |
|          | 305.0116   | 2.8  | 9.2  | 21.5 | 1858.3 | C21 H2 N2 Na     |

Supplementary Figure 83. HRMS of 1e.

Title            wyz7-55-h1  
Solvent         CDCl3  
Spectrometer Frequency 499.86

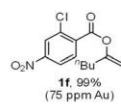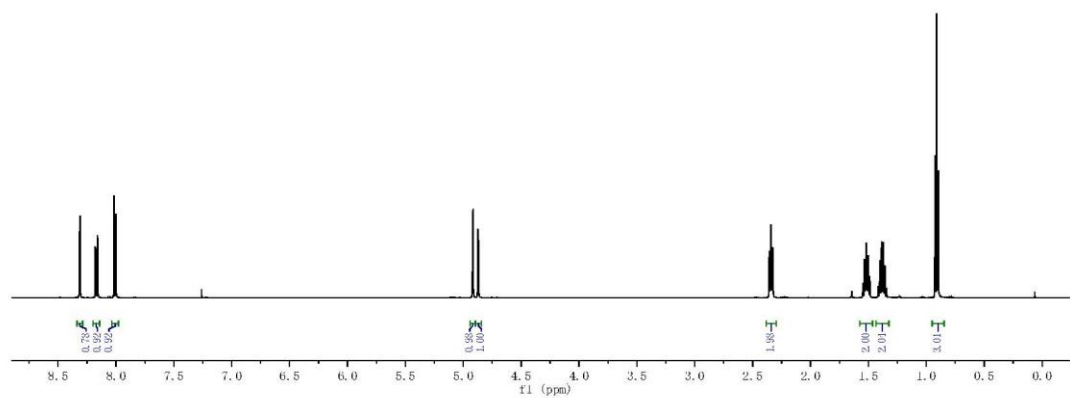

**Supplementary Figure 84. <sup>1</sup>H NMR spectrum of 1f.**

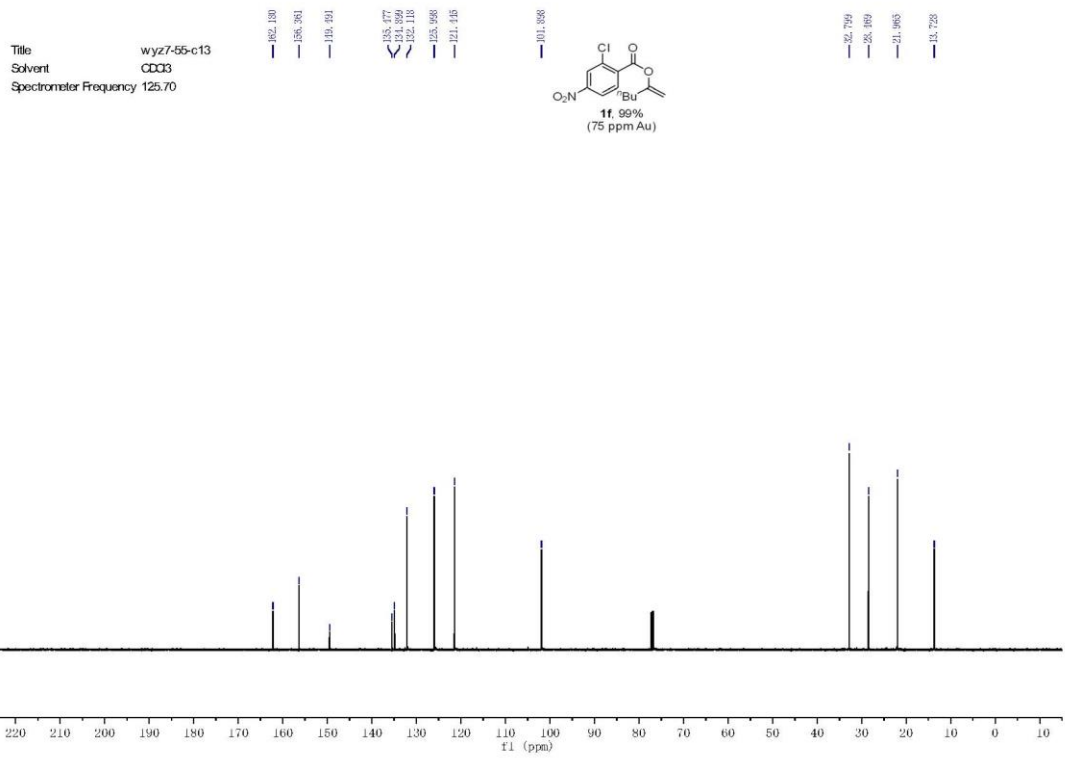

Supplementary Figure 85.  $^{13}\text{C}$  NMR spectrum of **1f**.

Single Mass Analysis

Tolerance = 3.0 mDa / DBE: min = -1.5, max = 50.0

Selected filters: None

Monoisotopic Mass, Even Electron Ions

1803 formula(e) evaluated with 17 results within limits (all results (up to 1000) for each mass)

Elements Used:

C: 0-100 H: 0-100 N: 0-10 O: 0-10 Na: 0-1 Cl: 0-2

Wang/Zhang, wuz1F, mw 283; ESI+

ZHA101513MJ 285 (5.294) Cn (Cen,4, 60.00, Ar); Sm (SG, 4x3.00); Cm (284:309)

UCSB CHEM BIOCHEM QTOF2  
TOF MS ES+  
4.84e3

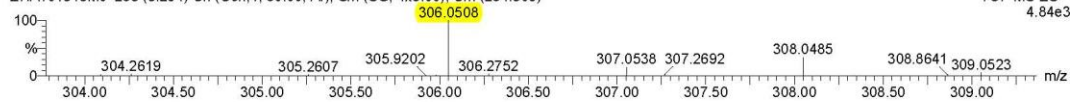

Minimum: -1.5  
Maximum: 3.0 10.0 50.0

| Mass     | Calc. Mass | mDa  | PPM  | DBE  | i-FIT | Formula             |
|----------|------------|------|------|------|-------|---------------------|
| 306.0508 | 306.0509   | -0.1 | -0.3 | 6.5  | 0.7   | C13 H14 N O4 Na Cl  |
|          | 306.0506   | 0.2  | 0.7  | 10.5 | 0.8   | C11 H9 N7 O2 Cl     |
|          | 306.0511   | -0.3 | -1.0 | 0.5  | 422.7 | C9 H18 N O6 Cl2     |
|          | 306.0504   | 0.4  | 1.3  | 16.5 | 744.9 | C15 H5 N7 Na        |
|          | 306.0501   | 0.7  | 2.3  | 2.5  | 407.3 | C8 H15 N5 O2 Na Cl2 |
|          | 306.0515   | -0.7 | -2.3 | 14.5 | 710.4 | C16 H8 N3 O4        |
|          | 306.0522   | -1.4 | -4.6 | 11.5 | 4.6   | C14 H10 N5 Na Cl    |
|          | 306.0493   | 1.5  | 4.9  | 5.5  | 15.0  | C10 H13 N3 O6 Cl    |
|          | 306.0523   | -1.5 | -4.9 | 3.5  | 844.0 | C3 H9 N9 O7 Na      |
|          | 306.0525   | -1.7 | -5.6 | 5.5  | 377.8 | C10 H14 N5 O2 Cl2   |
|          | 306.0491   | 1.7  | 5.6  | 11.5 | 711.4 | C14 H9 N3 O4 Na     |
|          | 306.0528   | -2.0 | -6.5 | 19.5 | 754.2 | C17 H4 N7           |
|          | 306.0488   | 2.0  | 6.5  | 15.5 | 729.7 | C12 H4 N9 O2        |
|          | 306.0531   | -2.3 | -7.5 | 15.5 | 739.7 | C19 H9 N O2 Na      |
|          | 306.0484   | 2.4  | 7.8  | 1.5  | 460.8 | C5 H14 N7 O4 Cl2    |
|          | 306.0533   | -2.5 | -8.2 | 9.5  | 4.8   | C15 H13 N O4 Cl     |
|          | 306.0482   | 2.6  | 8.5  | 7.5  | 14.0  | C9 H10 N7 O2 Na Cl  |

Supplementary Figure 86. HRMS of 1f.

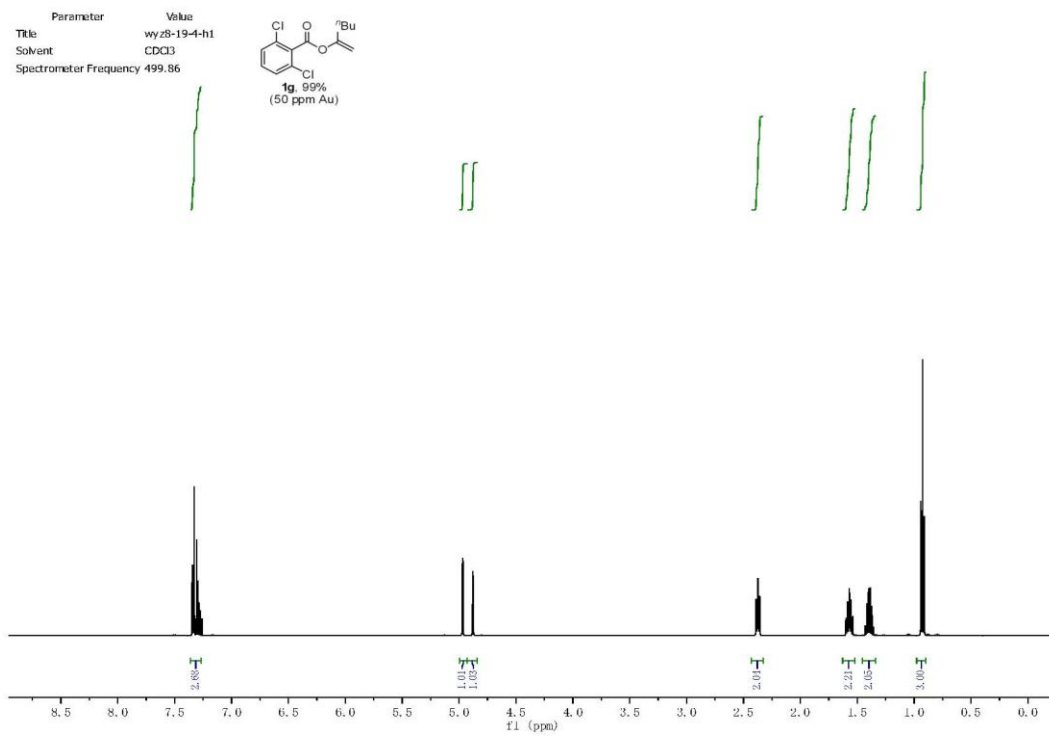

Supplementary Figure 87. <sup>1</sup>H NMR spectrum of **1g**.

Parameter Value  
Title wy28-19-4-C13  
Solvent CDCl3  
Spectrometer Frequency 125.70

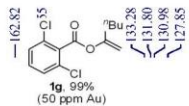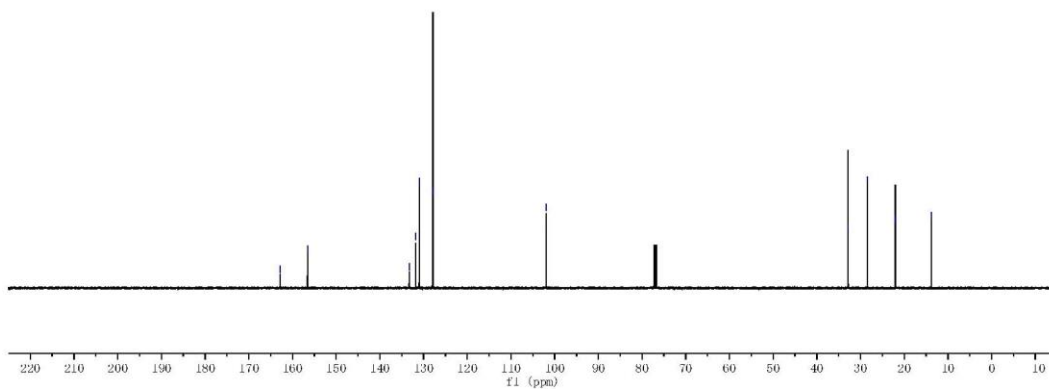

Supplementary Figure 88.  $^{13}\text{C}$  NMR spectrum of **1g**.

Single Mass Analysis

Tolerance = 3.0 mDa / DBE: min = -1.5, max = 50.0

Selected filters: None

Monoisotopic Mass, Even Electron Ions

1685 formula(e) evaluated with 18 results within limits (all results (up to 1000) for each mass)

Elements Used:

C: 0-100 H: 0-100 N: 0-10 O: 0-10 Na: 0-1 Cl: 0-2

Wang/Zhang, wuz1G, mw 272; ESI+

ZHA101513MA 262 (4.864) Cn (Cen,4, 60.00, Ar); Sm (SG, 4x3.00); Cm (190:335)

UCSB CHEM BIOCHEM QTOF2

TOF MS ES+

5.06e3

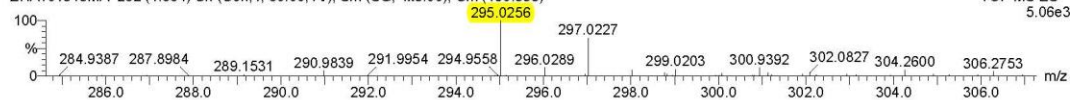

Minimum: -1.5  
Maximum: 3.0 10.0 50.0

| Mass     | Calc. Mass | mDa  | PPM  | DBE  | i-FIT  | Formula             |
|----------|------------|------|------|------|--------|---------------------|
| 295.0256 | 295.0256   | 0.0  | 0.0  | 18.5 | 1675.0 | C17 H3 N4 O2        |
|          | 295.0252   | 0.4  | 1.4  | 4.5  | 14.0   | C10 H13 N2 O4 Cl2   |
|          | 295.0250   | 0.6  | 2.0  | 10.5 | 413.0  | C14 H9 N2 O2 Na Cl  |
|          | 295.0250   | 0.6  | 2.0  | 2.5  | 1781.6 | C3 H8 N6 O9 Na      |
|          | 295.0264   | -0.8 | -2.7 | 7.5  | 1752.6 | C4 H4 N10 O5 Na     |
|          | 295.0247   | 0.9  | 3.1  | 14.5 | 422.1  | C12 H4 N8 Cl        |
|          | 295.0266   | -1.0 | -3.4 | 9.5  | 3.9    | C11 H9 N6 Cl2       |
|          | 295.0266   | -1.0 | -3.4 | 1.5  | 579.3  | H8 N10 O7 Cl        |
|          | 295.0243   | 1.3  | 4.4  | 13.5 | 1627.6 | C16 H7 O6           |
|          | 295.0269   | -1.3 | -4.4 | 5.5  | 3.3    | C13 H14 O2 Na Cl2   |
|          | 295.0242   | 1.4  | 4.7  | 6.5  | 14.3   | C9 H10 N6 Na Cl2    |
|          | 295.0272   | -1.6 | -5.4 | 19.5 | 1718.0 | C20 H4 N2 Na        |
|          | 295.0274   | -1.8 | -6.1 | 13.5 | 439.5  | C16 H8 N2 O2 Cl     |
|          | 295.0275   | -1.9 | -6.4 | 5.5  | 1719.1 | C5 H7 N6 O9         |
|          | 295.0234   | 2.2  | 7.5  | 9.5  | 393.6  | C11 H8 N4 O4 Cl     |
|          | 295.0232   | 2.4  | 8.1  | 15.5 | 1665.3 | C15 H4 N4 O2 Na     |
|          | 295.0282   | -2.6 | -8.8 | 2.5  | 499.0  | C3 H9 N8 O5 Na Cl   |
|          | 295.0228   | 2.8  | 9.5  | 1.5  | 44.2   | C8 H14 N2 O4 Na Cl2 |

Supplementary Figure 89. HRMS of 1g.

Title wyz7-86-h1  
Solvent CDCl3  
Spectrometer Frequency 499.86

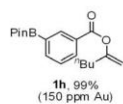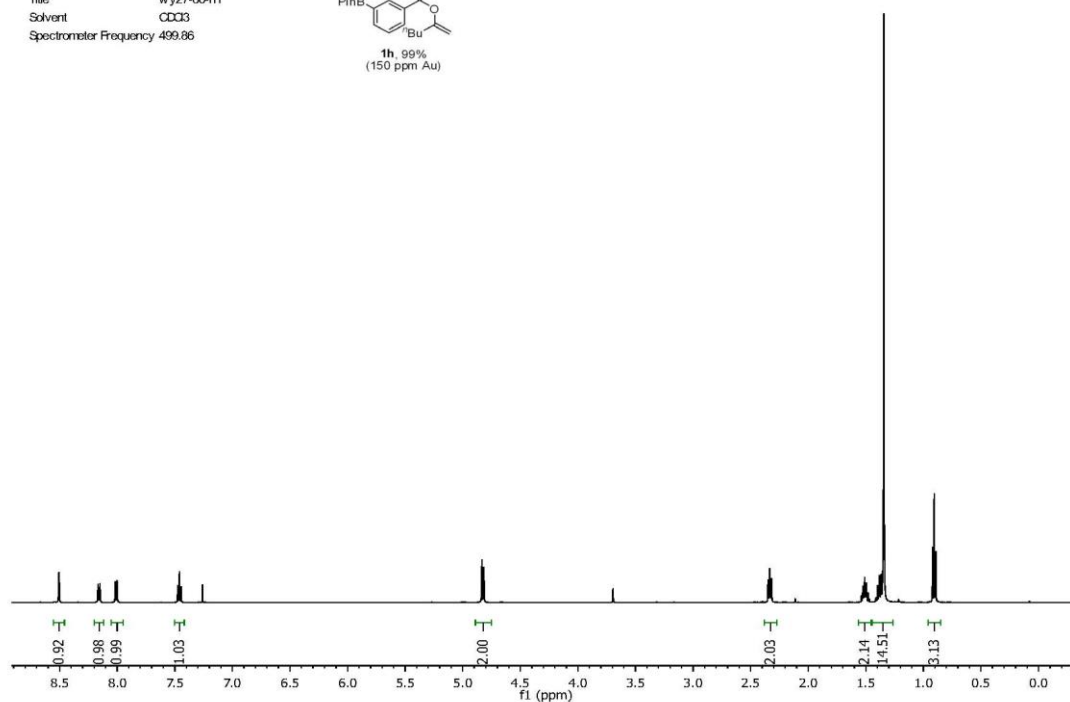

Supplementary Figure 90.  $^1\text{H}$  NMR spectrum of **1h**.



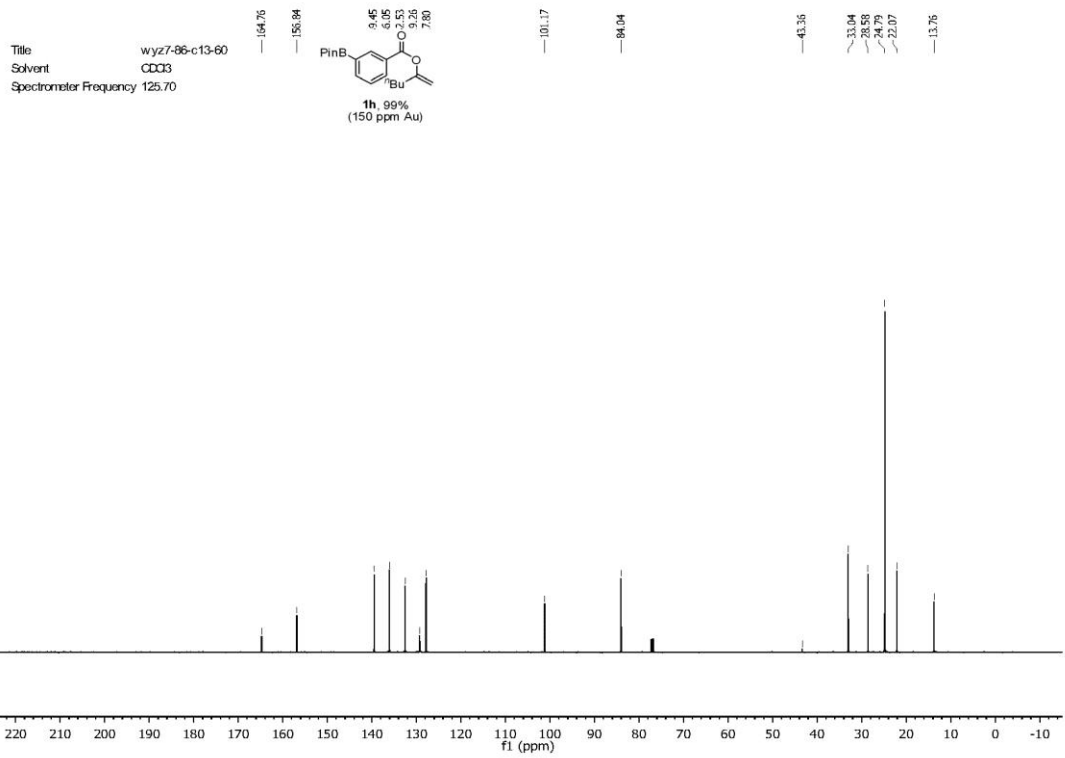

Supplementary Figure 91.  $^{13}\text{C}$  NMR spectrum of **1h**.

## Single Mass Analysis

Tolerance = 3.0 mDa / DBE: min = -1.5, max = 50.0

Selected filters: None

Monoisotopic Mass, Even Electron Ions

1729 formula(e) evaluated with 11 results within limits (all results (up to 1000) for each mass)

Elements Used:

C: 0-100 H: 0-100 N: 0-10 O: 0-10 Na: 0-1 10B: 0-1

Wang/Zhang, wyz1H, mw 330; ESI+

ZHA101513MI 505 (9.370) Cn (Cen,4, 60.00, Ar); Sm (SG, 4x3.00); Cm (488:527)

UCSB CHEM BIOCHEM QTOF2

TOF MS ES+

1.07e3

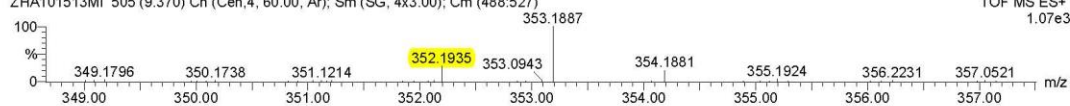

Minimum: -1.5  
Maximum: 3.0 10.0 50.0

| Mass     | Calc. Mass | mDa  | PPM  | DBE  | i-FIT | Formula              |
|----------|------------|------|------|------|-------|----------------------|
| 352.1935 | 352.1934   | 0.1  | 0.3  | 10.5 | 4.1   | C17 H22 N6 O2 10B    |
|          | 352.1936   | -0.1 | -0.3 | 6.5  | 4.4   | C19 H27 O4 Na 10B    |
|          | 352.1945   | -1.0 | -2.8 | 2.5  | 588.4 | C11 H26 N7 O6        |
|          | 352.1947   | -1.2 | -3.4 | -1.5 | 587.1 | C13 H31 N O8 Na      |
|          | 352.1921   | 1.4  | 4.0  | -0.5 | 595.8 | C9 H27 N7 O6 Na      |
|          | 352.1950   | -1.5 | -4.3 | 11.5 | 7.2   | C20 H23 N4 Na 10B    |
|          | 352.1920   | 1.5  | 4.3  | 5.5  | 3.7   | C16 H26 N2 O6 10B    |
|          | 352.1913   | 2.2  | 6.2  | 10.5 | 548.8 | C22 H26 N O3         |
|          | 352.1960   | -2.5 | -7.1 | 9.5  | 7.5   | C21 H26 O4 10B       |
|          | 352.1910   | 2.5  | 7.1  | 7.5  | 3.7   | C15 H23 N6 O2 Na 10B |
|          | 352.1961   | -2.6 | -7.4 | 3.5  | 581.1 | C14 H27 N5 O4 Na     |

## Supplementary Figure 92. HRMS of 1h.

Title           wyz7-8-pro-h1  
Solvent        CDCl3  
Spectrometer Frequency 499.86

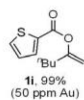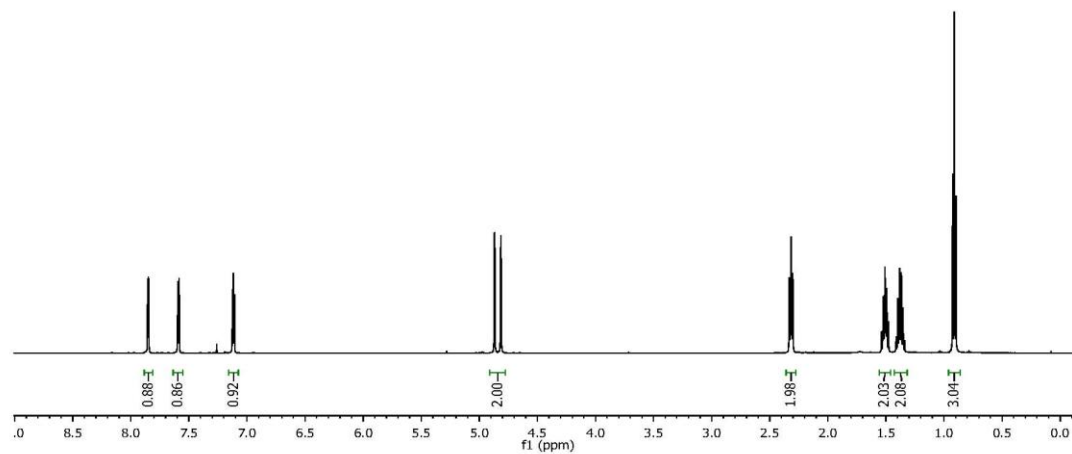

Supplementary Figure 93. <sup>1</sup>H NMR spectrum of 1i.

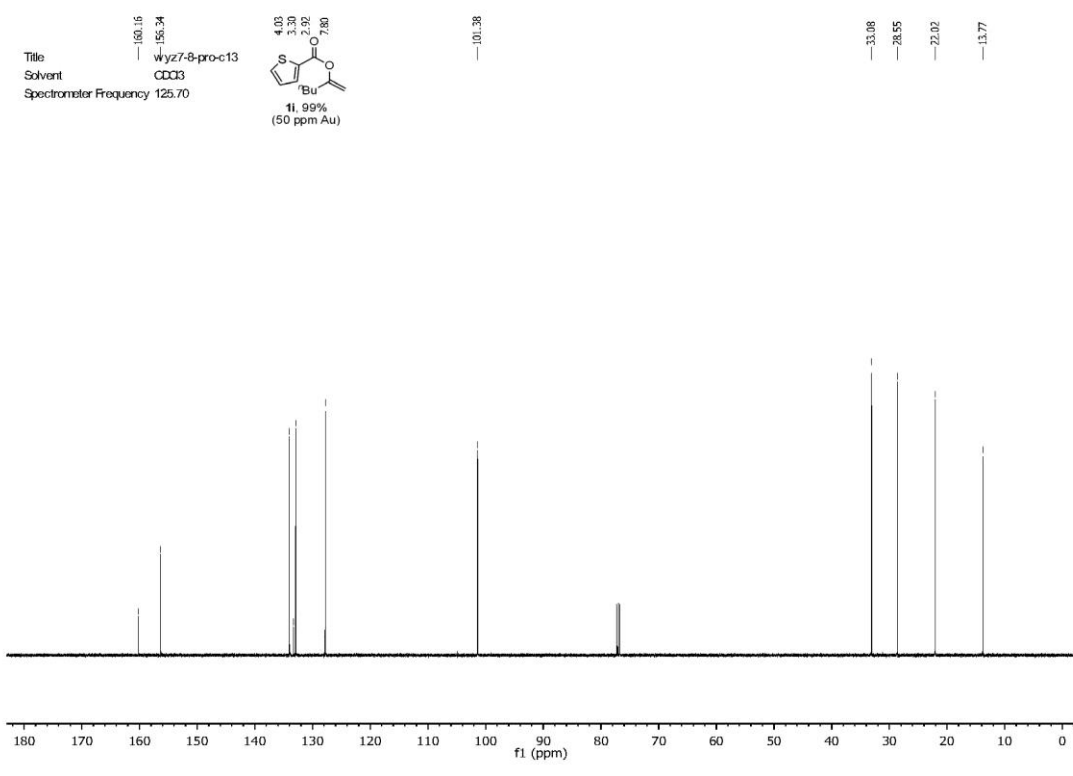

Supplementary Figure 94.  $^{13}\text{C}$  NMR spectrum of **1i**.

## Single Mass Analysis

Tolerance = 3.0 mDa / DBE: min = -1.5, max = 50.0

Selected filters: None

Monoisotopic Mass, Even Electron Ions

1078 formula(e) evaluated with 15 results within limits (all results (up to 1000) for each mass)

Elements Used:

C: 0-100 H: 0-100 N: 0-10 O: 0-10 Na: 0-1 S: 0-2

Wang/Zhang, wyz11, mw 210; ESI+

ZHA101513MH 497 (9.219) Cn (Cen,4, 60.00, Ar); Sm (SG, 4x3.00); Cm (491.529)

UCSB CHEM BIOCHEM QTOF2  
TOF MS ES+  
1.30e3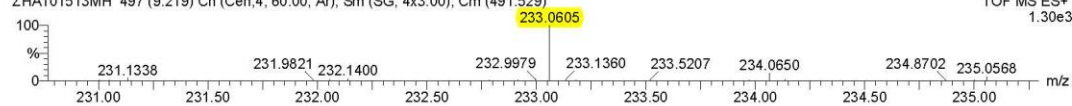

Minimum: -1.5  
Maximum: 3.0 10.0 50.0

| Mass     | Calc. Mass | mDa  | PPM   | DBE  | i-FIT | Formula         |
|----------|------------|------|-------|------|-------|-----------------|
| 233.0605 | 233.0603   | 0.2  | 0.9   | 12.5 | 33.6  | C16 H9 O2       |
|          | 233.0603   | 0.2  | 0.9   | -0.5 | 34.8  | C H13 N8 O2 S2  |
|          | 233.0609   | -0.4 | -1.7  | 8.5  | 4.8   | C9 H9 N6 S      |
|          | 233.0610   | -0.5 | -2.1  | 1.5  | 66.0  | C3 H10 N6 O5 Na |
|          | 233.0612   | -0.7 | -3.0  | 4.5  | 3.2   | C11 H14 O2 Na S |
|          | 233.0596   | 0.9  | 3.9   | 3.5  | 7.3   | C8 H13 N2 O4 S  |
|          | 233.0594   | 1.1  | 4.7   | 0.5  | 85.8  | H9 N8 O7        |
|          | 233.0619   | -1.4 | -6.0  | 0.5  | 17.6  | C4 H14 N6 Na S2 |
|          | 233.0621   | -1.6 | -6.9  | -0.5 | 59.0  | C4 H13 N2 O9    |
|          | 233.0624   | -1.9 | -8.2  | 6.5  | 58.4  | C4 H6 N10 O Na  |
|          | 233.0585   | 2.0  | 8.6   | 5.5  | 10.0  | C7 H10 N6 Na S  |
|          | 233.0630   | -2.5 | -10.7 | -1.5 | 21.6  | C5 H17 N2 O4 S2 |
|          | 233.0578   | 2.7  | 11.6  | 9.5  | 32.8  | C14 H10 O2 Na   |
|          | 233.0576   | 2.9  | 12.4  | 13.5 | 37.1  | C12 H5 N6       |
|          | 233.0634   | -2.9 | -12.4 | 4.5  | 50.5  | C5 H9 N6 O5     |

Supplementary Figure 95. HRMS of 1i.

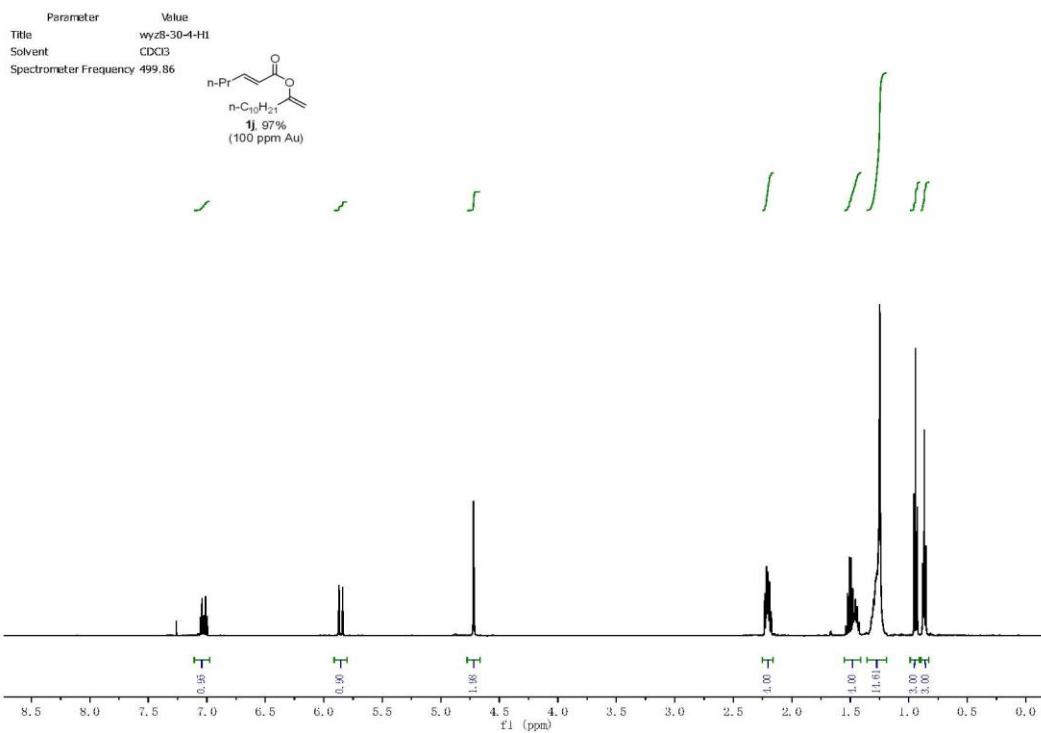

Supplementary Figure 96. <sup>1</sup>H NMR spectrum of **1j**.

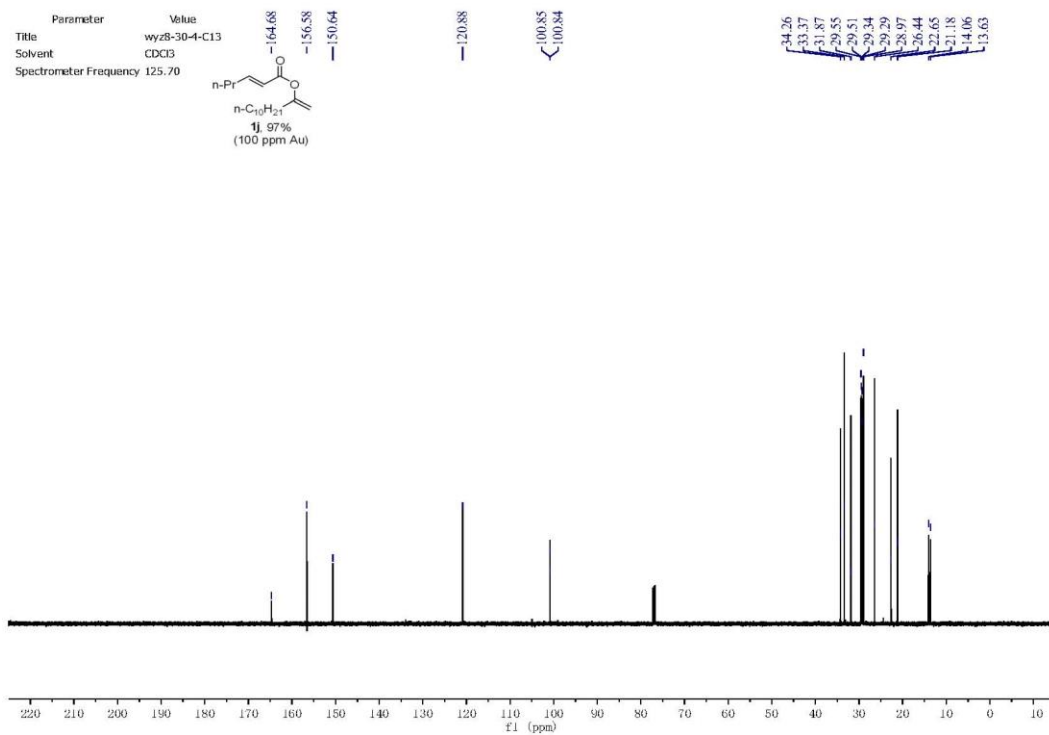

Supplementary Figure 97.  $^{13}\text{C}$  NMR spectrum of **1j**.

## Single Mass Analysis

Tolerance = 3.0 mDa / DBE: min = -1.5, max = 50.0

Selected filters: None

Monoisotopic Mass, Odd and Even Electron Ions

719 formula(e) evaluated with 6 results within limits (all results (up to 1000) for each mass)

Elements Used:

C: 0-100 H: 0-100 N: 0-10 O: 0-10 Na: 0-1

Wang/Zhang, wyz1J, mw 280; ESI+

ZHA103113ME 482 (8.941) Cn (Cen,4, 50.00, Ar); Sm (SG, 4x3.00); Cm (464:482)

UCSB CHEM BIOCHEM QTOF2  
TOF MS ES+  
3.90e3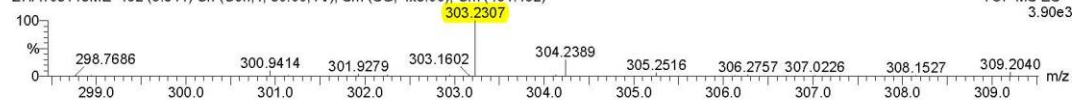

Minimum: -1.5  
Maximum: 3.0 10.0 50.0

| Mass     | Calc. Mass | mDa  | PPM  | DBE | i-FIT | Formula         |
|----------|------------|------|------|-----|-------|-----------------|
| 303.2307 | 303.2311   | -0.4 | -1.3 | 6.0 | 73.3  | C18 H29 N3 O    |
|          | 303.2300   | 0.7  | 2.3  | 2.5 | 84.3  | C18 H32 O2 Na   |
|          | 303.2297   | 1.0  | 3.3  | 6.5 | 97.3  | C16 H27 N6      |
|          | 303.2324   | -1.7 | -5.6 | 5.5 | 53.1  | C20 H31 O2      |
|          | 303.2287   | 2.0  | 6.6  | 3.0 | 110.3 | C16 H30 N3 O Na |
|          | 303.2284   | 2.3  | 7.6  | 1.5 | 119.9 | C15 H31 N2 O4   |

## Supplementary Figure 98. HRMS of 1j.



Title           wyz7-80-h1  
Solvent        CDCl3  
Spectrometer Frequency 499.86

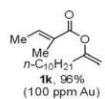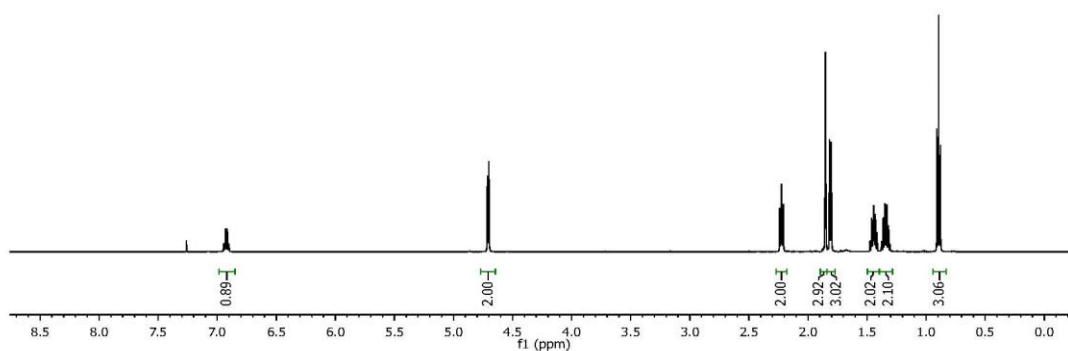

**Supplementary Figure 99.** <sup>1</sup>H NMR spectrum of 1k.

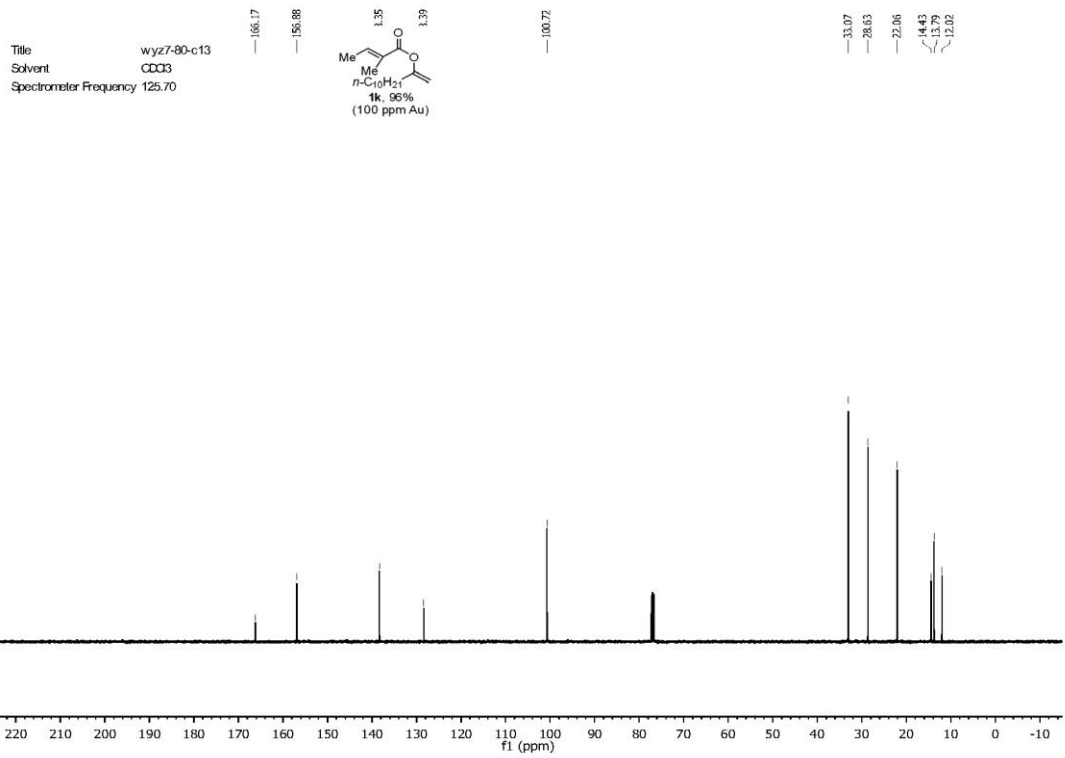

Supplementary Figure 100. <sup>13</sup>C NMR spectrum of 1k.

Single Mass Analysis

Tolerance = 3.0 mDa / DBE: min = -1.5, max = 50.0

Selected filters: None

Monoisotopic Mass, Odd and Even Electron Ions

669 formula(e) evaluated with 8 results within limits (all results (up to 1000) for each mass)

Elements Used:

C: 0-100 H: 0-100 N: 0-10 O: 0-10 Na: 0-1

Wang/Zhang, wzy1K, mw 266; ESI+

ZHA102413MB 325 (6.147) Cn (Cen,4, 60.00, Ar); Sm (SG, 4x3.00); Cm (325.405)

UCSB CHEM BIOCHEM QTOF2  
TOF MS ES+  
1.94e3

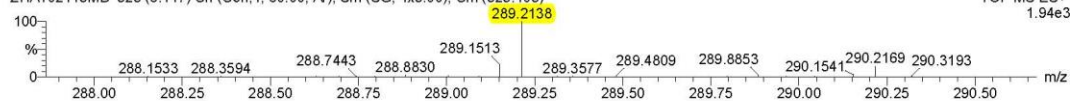

Minimum: -1.5  
Maximum: 3.0 10.0 50.0

| Mass     | Calc. Mass | mDa  | PPM   | DBE | i-FIT     | Formula         |
|----------|------------|------|-------|-----|-----------|-----------------|
| 289.2138 | 289.2141   | -0.3 | -1.0  | 6.5 | 2773376.5 | C15 H25 N6      |
|          | 289.2144   | -0.6 | -2.1  | 2.5 | 2773492.5 | C17 H30 O2 Na   |
|          | 289.2130   | 0.8  | 2.8   | 3.0 | 2773384.0 | C15 H28 N3 O Na |
|          | 289.2127   | 1.1  | 3.8   | 1.5 | 2773493.8 | C14 H29 N2 O4   |
|          | 289.2154   | -1.6 | -5.5  | 6.0 | 2773488.3 | C17 H27 N3 O    |
|          | 289.2117   | 2.1  | 7.3   | 3.5 | 2773271.3 | C13 H26 N6 Na   |
|          | 289.2114   | 2.4  | 8.3   | 2.0 | 2773394.3 | C12 H27 N5 O3   |
|          | 289.2168   | -3.0 | -10.4 | 5.5 | 2773589.0 | C19 H29 O2      |

Supplementary Figure 101. HRMS of 1k.

Title            wyz7-76-h1  
Solvent         CDCl3  
Spectrometer Frequency 499.86

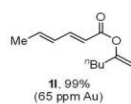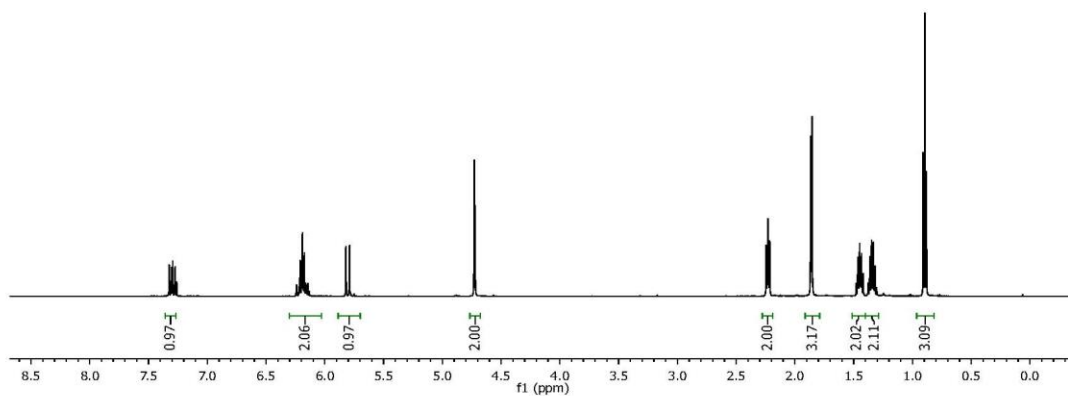

Supplementary Figure 102. <sup>1</sup>H NMR spectrum of 11.

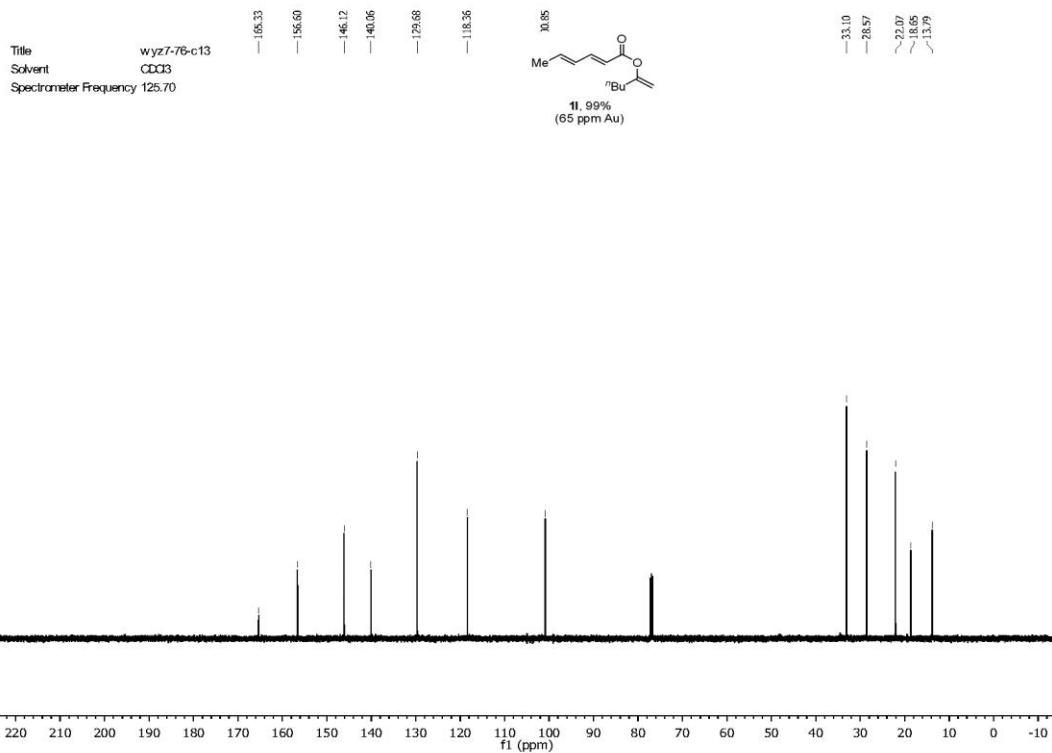

Supplementary Figure 103. <sup>13</sup>C NMR spectrum of **11**.

## Single Mass Analysis

Tolerance = 3.0 mDa / DBE: min = -1.5, max = 50.0

Selected filters: None

Monoisotopic Mass, Odd and Even Electron Ions

412 formula(e) evaluated with 7 results within limits (all results (up to 1000) for each mass)

Elements Used:

C: 0-100 H: 0-100 N: 0-10 O: 0-10 Na: 0-1

Wang/Zhang, wyz1L, mw 194; ESI+

ZHA102413MC 507 (9.641) Cn (Cen,4, 60.00, Ar); Sm (SG, 4x3.00); Cm (505:556)

UCSB CHEM BIOCHEM QTOF2  
TOF MS ES+  
3.62e3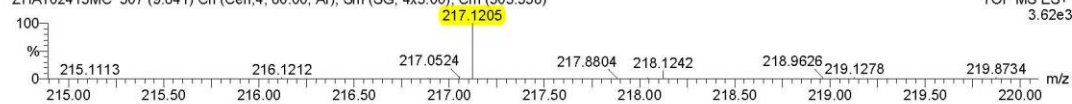

Minimum: -1.5  
Maximum: 50.0

| Mass     | Calc. Mass | mDa  | PPM   | DBE | i-FIT | Formula         |
|----------|------------|------|-------|-----|-------|-----------------|
| 217.1205 | 217.1204   | 0.1  | 0.5   | 3.5 | 12.8  | C12 H18 O2 Na   |
|          | 217.1202   | 0.3  | 1.4   | 7.5 | 22.0  | C10 H13 N6      |
|          | 217.1215   | -1.0 | -4.6  | 7.0 | 15.3  | C12 H15 N3 O    |
|          | 217.1191   | 1.4  | 6.4   | 4.0 | 22.5  | C10 H16 N3 O Na |
|          | 217.1188   | 1.7  | 7.8   | 2.5 | 19.7  | C9 H17 N2 O4    |
|          | 217.1229   | -2.4 | -11.1 | 6.5 | 14.3  | C14 H17 O2      |
|          | 217.1178   | 2.7  | 12.4  | 4.5 | 38.0  | C8 H14 N6 Na    |

## Supplementary Figure 104. HRMS of 11.

Parameter Value  
Title wy28-32-3-h1  
Solvent CDCl3  
Spectrometer Frequency 499.86  
Nucleus 1H

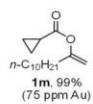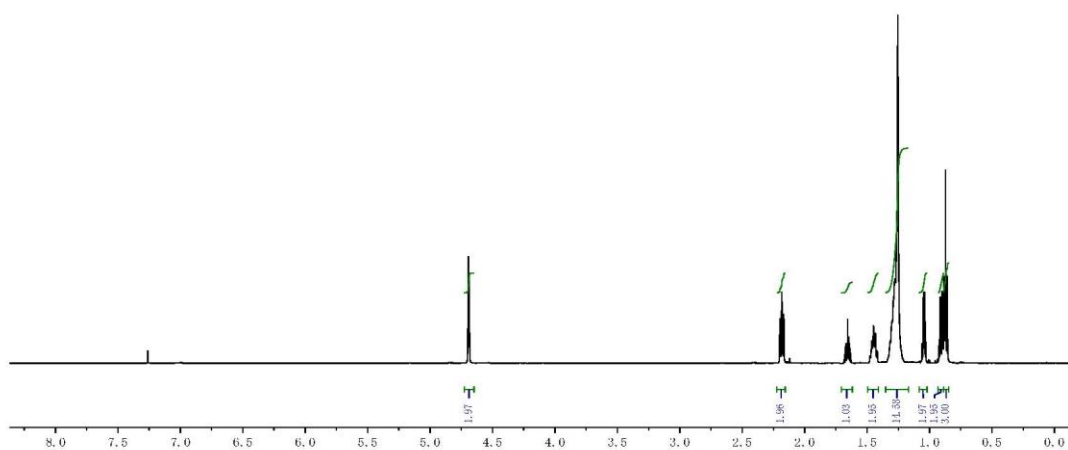

Supplementary Figure 105. <sup>1</sup>H NMR spectrum of **1m**.

Parameter Value  
Title wy28-32-3-c13  
Solvent CDCl3  
Spectrometer Frequency 125.70  
Nucleus 13C

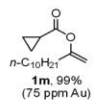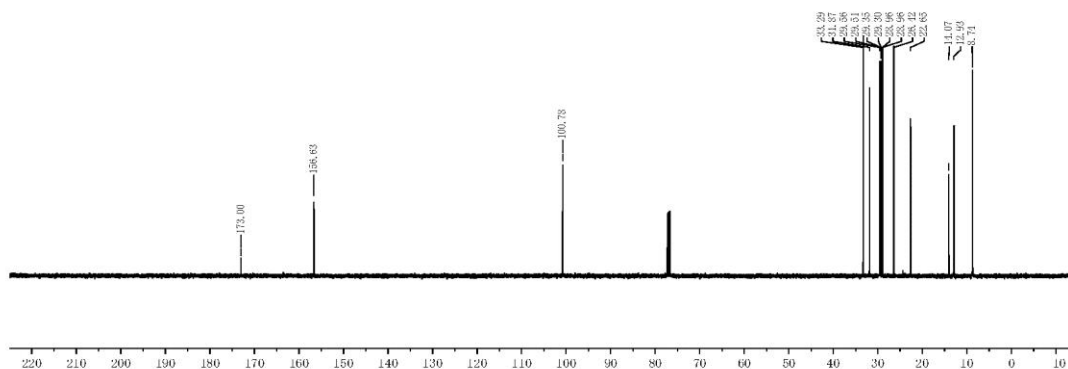

Supplementary Figure 106.  $^{13}\text{C}$  NMR spectrum of 1m.



## Single Mass Analysis

Tolerance = 3.0 mDa / DBE: min = -1.5, max = 50.0

Selected filters: None

Monoisotopic Mass, Odd and Even Electron Ions

624 formula(e) evaluated with 9 results within limits (all results (up to 1000) for each mass)

Elements Used:

C: 0-100 H: 0-100 N: 0-10 O: 0-10 Na: 0-1

Wang/Zhang, wyz1M, mw 252; ESI+

ZHA101513MD 527 (9.775) Cn (Cen,4, 60.00, Ar); Sm (SG, 4x3.00); Cm (508:578)

UCSB CHEM BIOCHEM QTOF2

TOF MS ES+

1.01e4

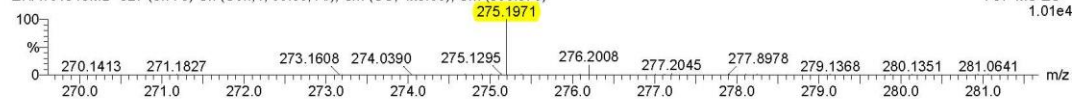

Minimum: -1.5  
 Maximum: 3.0 10.0 50.0

| Mass     | Calc. Mass | mDa  | PPM  | DBE  | i-FIT | Formula          |
|----------|------------|------|------|------|-------|------------------|
| 275.1971 | 275.1971   | 0.0  | 0.0  | 1.5  | 21.5  | C13 H27 N2 O4    |
|          | 275.1974   | -0.3 | -1.1 | 3.0  | 25.1  | C14 H26 N3 O Na  |
|          | 275.1960   | 1.1  | 4.0  | 3.5  | 53.1  | C12 H24 N6 Na    |
|          | 275.1984   | -1.3 | -4.7 | 6.5  | 25.4  | C14 H23 N6       |
|          | 275.1957   | 1.4  | 5.1  | 2.0  | 52.0  | C11 H25 N5 O3    |
|          | 275.1987   | -1.6 | -5.8 | 2.5  | 11.2  | C16 H28 O2 Na    |
|          | 275.1947   | 2.4  | 8.7  | -1.5 | 71.8  | C11 H28 N2 O4 Na |
|          | 275.1998   | -2.7 | -9.8 | 6.0  | 17.9  | C16 H25 N3 O     |
|          | 275.1944   | 2.7  | 9.8  | 2.5  | 96.6  | C9 H23 N8 O2     |

## Supplementary Figure 107. HRMS of 1m.

Title           wyz7-9-pro-h1  
Solvent        cdcl3  
Spectrometer Frequency 599.63

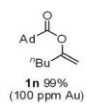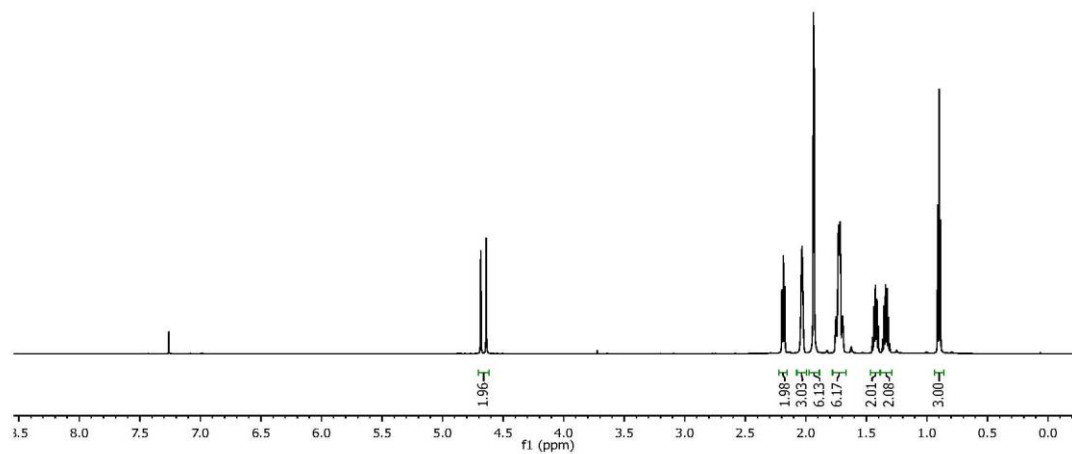

Supplementary Figure 108. <sup>1</sup>H NMR spectrum of 1n.

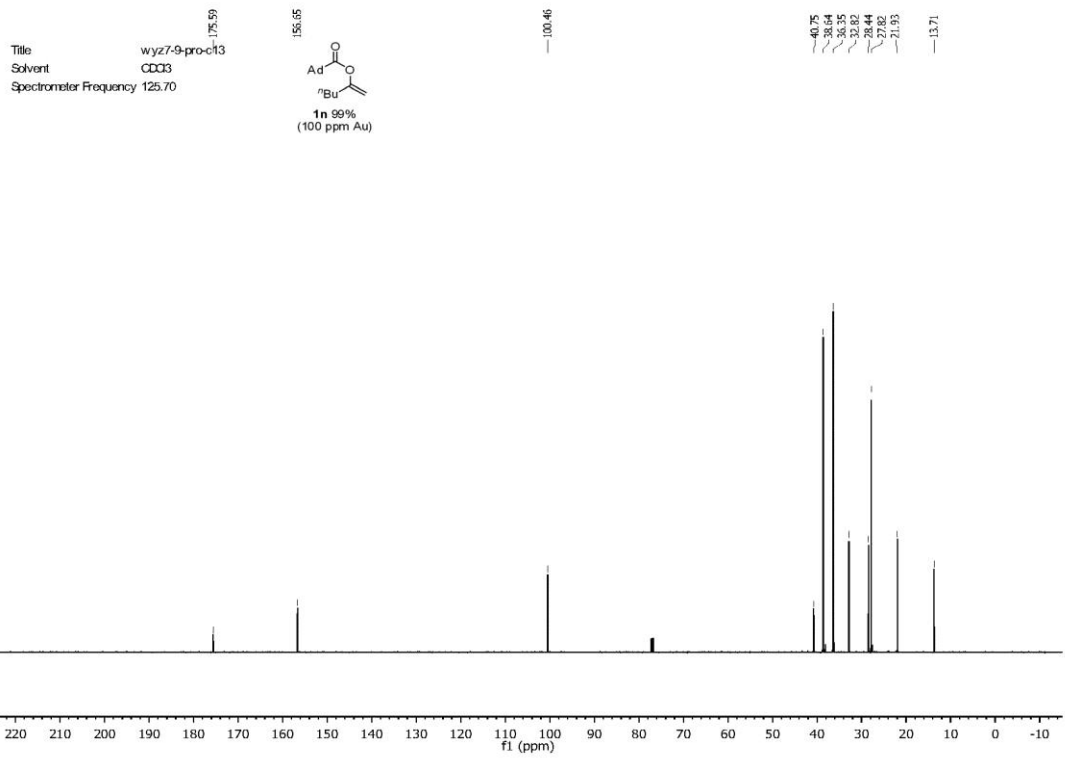

Supplementary Figure 109.  $^{13}\text{C}$  NMR spectrum of 1n.

## Single Mass Analysis

Tolerance = 3.0 mDa / DBE: min = -1.5, max = 50.0

Selected filters: None

Monoisotopic Mass, Odd and Even Electron Ions

655 formula(e) evaluated with 7 results within limits (all results (up to 1000) for each mass)

Elements Used:

C: 0-100 H: 0-100 N: 0-10 O: 0-10 Na: 0-1

Wang/Zhang, wyz1N, mw 262; ESI+

ZHA101513MG 195 (3.622) Cn (Cen,4, 60.00, Ar); Sm (SG, 4x3.00); Cm (192:227)

UCSB CHEM BIOCHEM QTOF2  
TOF MS ES+  
1.65e3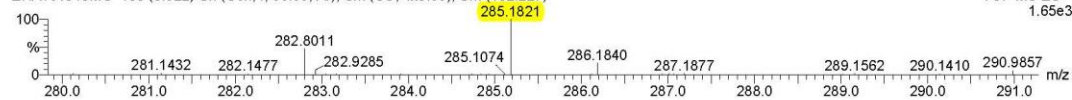

Minimum: -1.5  
Maximum: 50.0

| Mass     | Calc. Mass | mDa  | PPM  | DBE | i-FIT | Formula         |
|----------|------------|------|------|-----|-------|-----------------|
| 285.1821 | 285.1817   | 0.4  | 1.4  | 5.0 | 2.7   | C15 H24 N3 O Na |
|          | 285.1814   | 0.7  | 2.5  | 3.5 | 5.0   | C14 H25 N2 O4   |
|          | 285.1828   | -0.7 | -2.5 | 8.5 | 1.4   | C15 H21 N6      |
|          | 285.1831   | -1.0 | -3.5 | 4.5 | 0.6   | C17 H26 O2 Na   |
|          | 285.1804   | 1.7  | 6.0  | 5.5 | 7.2   | C13 H22 N6 Na   |
|          | 285.1841   | -2.0 | -7.0 | 8.0 | 0.4   | C17 H23 N3 O    |
|          | 285.1801   | 2.0  | 7.0  | 4.0 | 9.6   | C12 H23 N5 O3   |

## Supplementary Figure 110. HRMS of 1n.

Parameter Value  
Title wy28-14-4-h1  
Solvent CDCl3  
Spectrometer Frequency 499.86  
Nucleus 1H

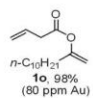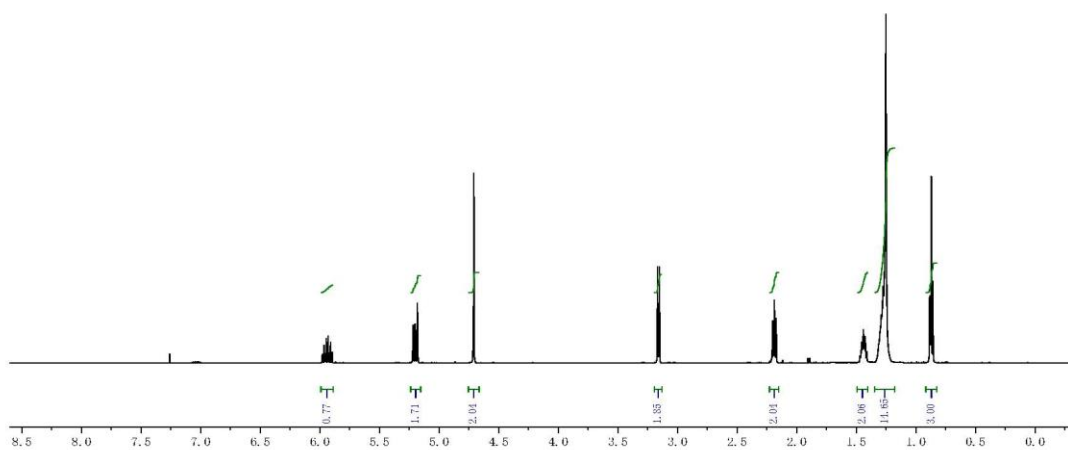

Supplementary Figure 111. <sup>1</sup>H NMR spectrum of 10.



## Single Mass Analysis

Tolerance = 3.0 mDa / DBE: min = -1.5, max = 50.0

Selected filters: None

Monoisotopic Mass, Odd and Even Electron Ions

624 formula(e) evaluated with 9 results within limits (all results (up to 1000) for each mass)

Elements Used:

C: 0-100 H: 0-100 N: 0-10 O: 0-10 Na: 0-1

Wang/Zhang, wyz10, mw 252; ESI+

ZHA101513MF 287 (5.327) Cn (Cen,4, 60.00, Ar); Sm (SG, 4x3.00); Cm (287:314)

UCSB CHEM BIOCHEM QTOF2  
TOF MS ES+  
2.74e3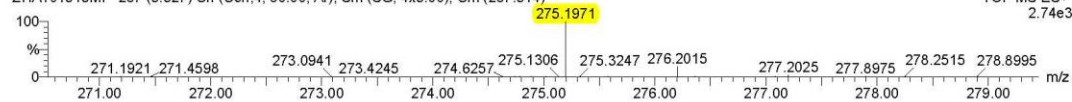

Minimum: -1.5  
Maximum: 50.0

| Mass     | Calc. Mass | mDa  | PPM  | DBE  | i-FIT | Formula          |
|----------|------------|------|------|------|-------|------------------|
| 275.1971 | 275.1971   | 0.0  | 0.0  | 1.5  | 9.9   | C13 H27 N2 O4    |
|          | 275.1974   | -0.3 | -1.1 | 3.0  | 11.4  | C14 H26 N3 O Na  |
|          | 275.1960   | 1.1  | 4.0  | 3.5  | 20.3  | C12 H24 N6 Na    |
|          | 275.1984   | -1.3 | -4.7 | 6.5  | 11.2  | C14 H23 N6       |
|          | 275.1957   | 1.4  | 5.1  | 2.0  | 19.6  | C11 H25 N5 O3    |
|          | 275.1987   | -1.6 | -5.8 | 2.5  | 6.2   | C16 H28 O2 Na    |
|          | 275.1947   | 2.4  | 8.7  | -1.5 | 25.2  | C11 H28 N2 O4 Na |
|          | 275.1998   | -2.7 | -9.8 | 6.0  | 7.7   | C16 H25 N3 O     |
|          | 275.1944   | 2.7  | 9.8  | 2.5  | 32.9  | C9 H23 N8 O2     |

## Supplementary Figure 113. HRMS of 1o.







| Parameter              | Value         |
|------------------------|---------------|
| Title                  | wyz8-28-3-F19 |
| Solvent                | cdcl3         |
| Spectrometer Frequency | 376.33        |

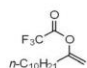

**1p**, 99%  
(10 ppm Au)

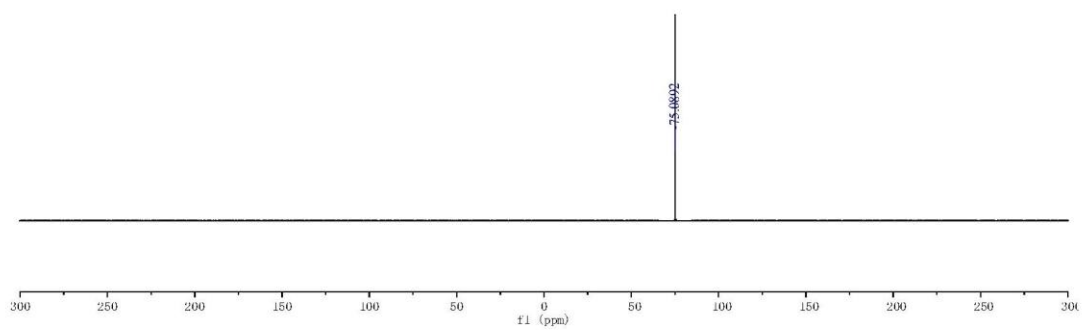

**Supplementary Figure 116. <sup>19</sup>F NMR of 1p.**

## Single Mass Analysis

Tolerance = 3.0 mDa / DBE: min = -1.5, max = 200.0

Element prediction: Off

Monoisotopic Mass, Odd and Even Electron Ions

1458 formula(e) evaluated with 17 results within limits (all results (up to 1000) for each mass)

Elements Used:

C: 0-100 H: 0-200 N: 0-10 O: 0-10 F: 0-5

Wang/Zhang, wyz pr 5 1p CF3, mw 280, FI+  
ZHA060613PA 435 (7.250) Cn (Cen,3, 80.00, Ar); Sm (SG, 4x3.00); Cm (435:483)UCSB Chem\_Biochem GCT Premier  
TOF MS FI+  
5.04e+003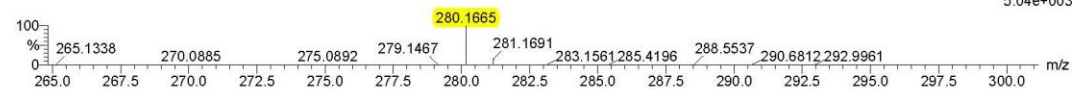

Minimum: -1.5  
Maximum: 200.0

| Mass     | Calc. Mass | mDa  | PPM  | DBE  | i-FIT | Formula         |
|----------|------------|------|------|------|-------|-----------------|
| 280.1665 | 280.1661   | 0.4  | 1.4  | 5.5  | 406.1 | C14 H22 N3 O3   |
|          | 280.1659   | 0.6  | 2.1  | 2.0  | 197.7 | C9 H21 N6 O3 F  |
|          | 280.1657   | 0.8  | 2.9  | -1.5 | 138.9 | C4 H20 N9 O3 F2 |
|          | 280.1673   | -0.8 | -2.9 | 1.5  | 307.0 | C11 H23 N3 O4 F |
|          | 280.1675   | -1.0 | -3.6 | 5.0  | 557.9 | C16 H24 O4      |
|          | 280.1650   | 1.5  | 5.4  | 2.0  | 270.6 | C14 H23 O2 F3   |
|          | 280.1648   | 1.7  | 6.1  | 6.0  | 270.1 | C12 H20 N6 O2   |
|          | 280.1648   | 1.7  | 6.1  | -1.5 | 114.6 | C9 H22 N3 O2 F4 |
|          | 280.1684   | -1.9 | -6.8 | 3.0  | 41.5  | C7 H18 N10 F2   |
|          | 280.1646   | 1.9  | 6.8  | 2.5  | 115.7 | C7 H19 N9 O2 F  |
|          | 280.1686   | -2.1 | -7.5 | 1.0  | 437.0 | C13 H25 O5 F    |
|          | 280.1686   | -2.1 | -7.5 | -1.0 | 41.2  | C9 H21 N4 F5    |
|          | 280.1686   | -2.1 | -7.5 | 6.5  | 163.6 | C12 H19 N7 F    |
|          | 280.1688   | -2.3 | -8.2 | 10.0 | 441.5 | C17 H20 N4      |
|          | 280.1688   | -2.3 | -8.2 | 2.5  | 164.7 | C14 H22 N F4    |
|          | 280.1639   | 2.6  | 9.3  | 6.0  | 406.1 | C17 H22 O F2    |
|          | 280.1637   | 2.8  | 10.0 | 2.5  | 157.6 | C12 H21 N3 O F3 |

Supplementary Figure 117. HRMS of 1p.

Parameter Value  
Title wyz8-28-1-h1  
Solvent CDCl3  
Spectrometer Frequency 499.86  
Nucleus 1H

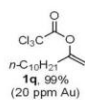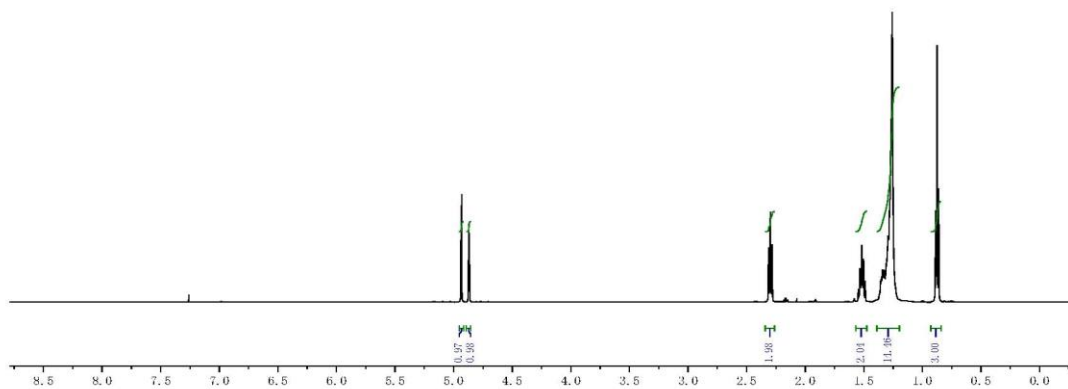

Supplementary Figure 118. <sup>1</sup>H NMR spectrum of **1q**.



## Single Mass Analysis

Tolerance = 3.0 mDa / DBE: min = -1.5, max = 50.0

Selected filters: None

Monoisotopic Mass, Even Electron Ions

2711 formula(e) evaluated with 26 results within limits (all results (up to 1000) for each mass)

Elements Used:

C: 0-100 H: 0-100 N: 0-10 O: 0-10 Na: 0-1 Cl: 0-3

Wang/Zhang, wuz1Q, mw 328; ESI+

ZHA102413MD 1080 (20.436) Cn (Cen.4, 60.00, Ar); Sm (SG, 4x3.00); Cm (1016:1154)

UCSB CHEM BIOCHEM QTOF2  
TOF MS ES+  
1.34e3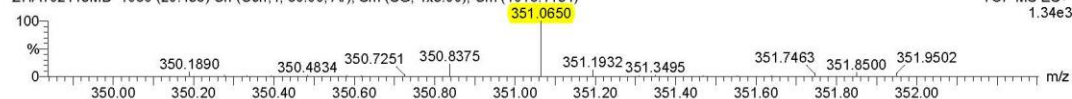

Minimum: -1.5  
Maximum: 3.0 10.0 50.0

| Mass     | Calc. Mass | mDa  | PPM  | DBE  | i-FIT     | Formula              |
|----------|------------|------|------|------|-----------|----------------------|
| 351.0650 | 351.0649   | 0.1  | 0.3  | 6.5  | 5546647.5 | C7 H11 N8 O9         |
|          | 351.0649   | 0.1  | 0.3  | 14.5 | 5546686.5 | C18 H12 N4 O2 Cl     |
|          | 351.0647   | 0.3  | 0.9  | 20.5 | 5546682.0 | C22 H8 N4 Na         |
|          | 351.0645   | 0.5  | 1.4  | 0.5  | 5546691.5 | C11 H22 N2 O4 Cl3    |
|          | 351.0657   | -0.7 | -2.0 | 3.5  | 5546685.5 | C5 H13 N10 O5 Na Cl  |
|          | 351.0643   | 0.7  | 2.0  | 6.5  | 5546690.5 | C15 H18 N2 O2 Na Cl2 |
|          | 351.0643   | 0.7  | 2.0  | -1.5 | 5546686.0 | C4 H17 N6 O9 Na Cl   |
|          | 351.0657   | -0.7 | -2.0 | 18.5 | 5546682.0 | C23 H11 O4           |
|          | 351.0659   | -0.9 | -2.6 | 5.5  | 5546691.5 | C12 H18 N6 Cl3       |
|          | 351.0640   | 1.0  | 2.8  | 10.5 | 5546690.5 | C13 H13 N8 Cl2       |
|          | 351.0661   | -1.1 | -3.1 | 1.5  | 5546691.5 | C14 H23 O2 Na Cl3    |
|          | 351.0635   | 1.5  | 4.3  | 9.5  | 5546686.5 | C17 H16 O6 Cl        |
|          | 351.0665   | -1.5 | -4.3 | 15.5 | 5546687.0 | C21 H13 N2 Na Cl     |
|          | 351.0665   | -1.5 | -4.3 | 7.5  | 5546660.5 | C10 H12 N6 O7 Na     |
|          | 351.0634   | 1.6  | 4.6  | 2.5  | 5546691.5 | C10 H19 N6 Na Cl3    |
|          | 351.0667   | -1.7 | -4.8 | 9.5  | 5546690.5 | C17 H17 N2 O2 Cl2    |
|          | 351.0667   | -1.7 | -4.8 | 1.5  | 5546686.0 | C6 H16 N6 O9 Cl      |
|          | 351.0633   | 1.7  | 4.8  | 15.5 | 5546680.0 | C21 H12 O4 Na        |
|          | 351.0630   | 2.0  | 5.7  | 19.5 | 5546680.0 | C19 H7 N6 O2         |
|          | 351.0671   | -2.1 | -6.0 | 23.5 | 5546683.5 | C24 H7 N4            |
|          | 351.0627   | 2.3  | 6.6  | 5.5  | 5546690.5 | C12 H17 N4 O4 Cl2    |
|          | 351.0625   | 2.5  | 7.1  | 11.5 | 5546686.5 | C16 H13 N4 O2 Na Cl  |
|          | 351.0675   | -2.5 | -7.1 | -1.5 | 5546690.5 | C4 H18 N8 O5 Na Cl2  |
|          | 351.0625   | 2.5  | 7.1  | 3.5  | 5546628.0 | C5 H12 N8 O9 Na      |
|          | 351.0622   | 2.8  | 8.0  | 15.5 | 5546686.5 | C14 H8 N10 Cl        |
|          | 351.0679   | -2.9 | -8.3 | 12.5 | 5546668.5 | C11 H8 N10 O3 Na     |

Supplementary Figure 120. HRMS of 1q.

Title            wvz7-84-h1  
Solvent        cdcl3  
Spectrometer Frequency 599.63

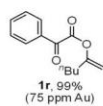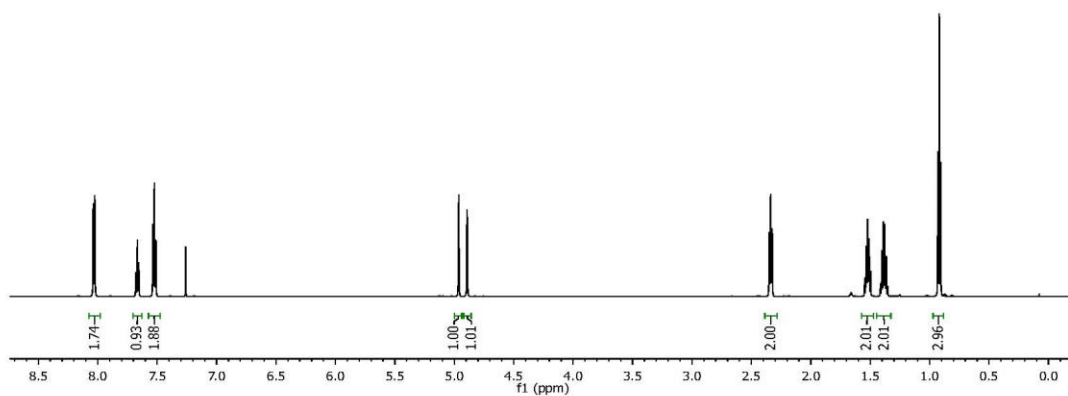

Supplementary Figure 121. <sup>1</sup>H NMR spectrum of **1r**.

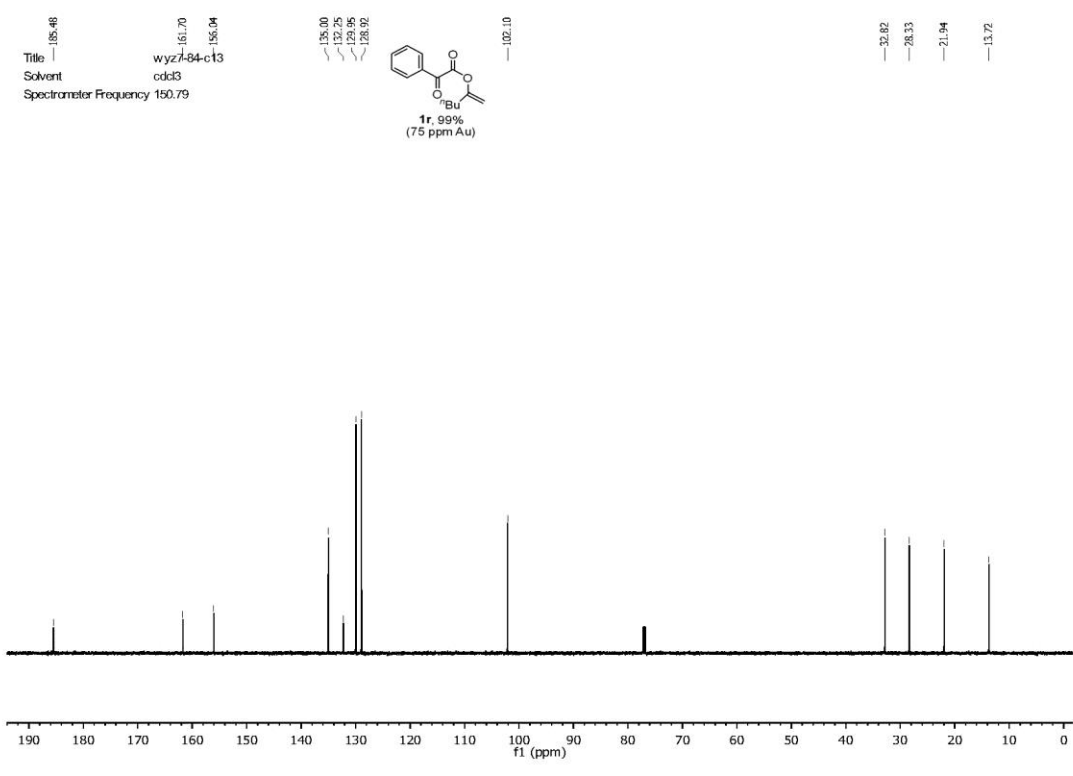

Supplementary Figure 122. <sup>13</sup>C NMR spectrum of **1r**.



## Single Mass Analysis

Tolerance = 3.0 mDa / DBE: min = -1.5, max = 50.0

Selected filters: None

Monoisotopic Mass, Odd and Even Electron Ions

561 formula(e) evaluated with 9 results within limits (all results (up to 1000) for each mass)

Elements Used:

C: 0-100 H: 0-100 N: 0-10 O: 0-10 Na: 0-1

Wang/Zhang, wyz1R, mw 232; ESI+

ZHA101513ML 198 (3.677) Cn (Cen.4, 60.00, Ar); Sm (SG, 4x3.00); Cm (151:218)

UCSB CHEM BIOCHEM QTOF2  
TOF MS ES+  
2.53e3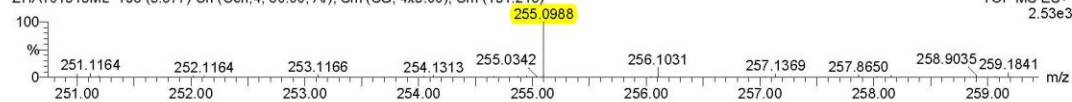

Minimum: -1.5  
Maximum: 3.0 10.0 50.0

| Mass     | Calc. Mass | mDa  | PPM   | DBE  | i-FIT | Formula          |
|----------|------------|------|-------|------|-------|------------------|
| 255.0988 | 255.0984   | 0.4  | 1.6   | 7.0  | 57.4  | C12 H14 N3 O2 Na |
|          | 255.0994   | -0.6 | -2.4  | 10.5 | 55.1  | C12 H11 N6 O     |
|          | 255.0981   | 0.7  | 2.7   | 5.5  | 55.9  | C11 H15 N2 O5    |
|          | 255.0981   | 0.7  | 2.7   | 11.0 | 67.7  | C10 H9 N9        |
|          | 255.0997   | -0.9 | -3.5  | 6.5  | 46.1  | C14 H16 O3 Na    |
|          | 255.0970   | 1.8  | 7.1   | 7.5  | 71.6  | C10 H12 N6 O Na  |
|          | 255.1008   | -2.0 | -7.8  | 10.0 | 45.6  | C14 H13 N3 O2    |
|          | 255.0968   | 2.0  | 7.8   | 6.0  | 71.6  | C9 H13 N5 O4     |
|          | 255.1016   | -2.8 | -11.0 | -1.0 | 174.7 | C H14 N9 O5 Na   |

## Supplementary Figure 123. HRMS of 1r.

Parameter Value  
Title wvz8-26-10-h1  
Solvent CDCl3  
Spectrometer Frequency 499.86  
Nucleus 1H

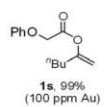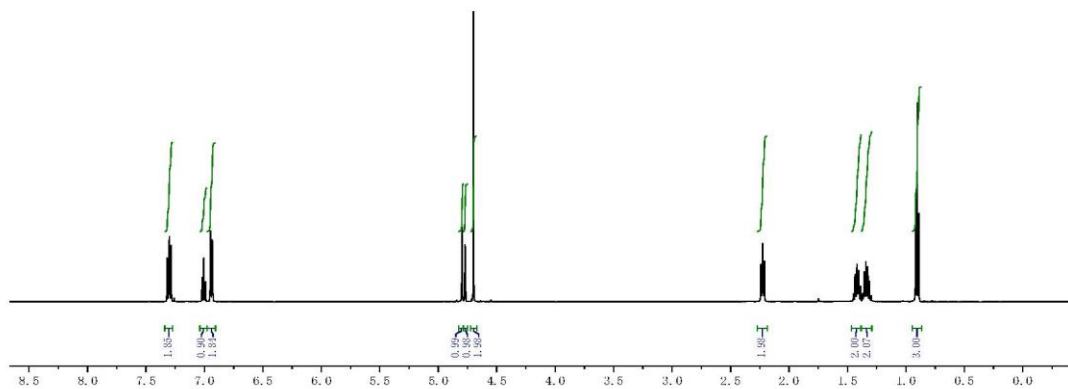

Supplementary Figure 124. <sup>1</sup>H NMR spectrum of **1s**.

Parameter Value  
Title wyz8-26-10-c13  
Solvent CDCl3  
Spectrometer Frequency 125.70  
Nucleus 13C

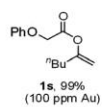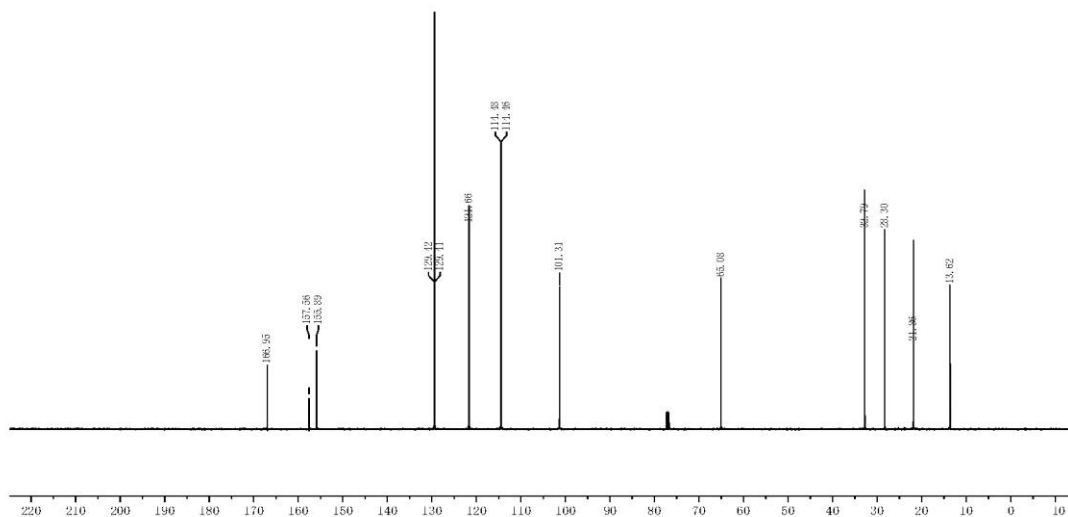

Supplementary Figure 125. <sup>13</sup>C NMR spectrum of **1s**.

## Single Mass Analysis

Tolerance = 3.0 mDa / DBE: min = -1.5, max = 50.0

Selected filters: None

Monoisotopic Mass, Even Electron Ions

564 formula(e) evaluated with 4 results within limits (all results (up to 1000) for each mass)

Elements Used:

C: 0-100 H: 0-100 N: 0-10 O: 0-10 Na: 0-1

Wang/Zhang, wuz1s, 234, ESI+/TOF

ZHA101613MA 980 (18.540) Cn (Cen,4, 60.00, Ar); Sm (SG, 4x3.00); Cm (941:1159)

UCSB CHEM BIOCHEM QTOF2

TOF MS ES+

3.61e4

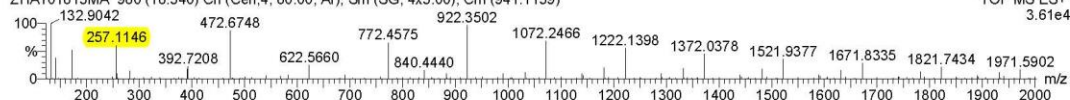

Minimum: -1.5  
 Maximum: 3.0 10.0 50.0

| Mass     | Calc. Mass | mDa  | PPM  | DBE | i-FIT | Formula         |
|----------|------------|------|------|-----|-------|-----------------|
| 257.1146 | 257.1151   | -0.5 | -1.9 | 9.5 | 31.0  | C12 H13 N6 O    |
|          | 257.1154   | -0.8 | -3.1 | 5.5 | 7.1   | C14 H18 O3 Na   |
|          | 257.1137   | 0.9  | 3.5  | 4.5 | 43.5  | C11 H17 N2 O5   |
|          | 257.1127   | 1.9  | 7.4  | 6.5 | 96.8  | C10 H14 N6 O Na |

## Supplementary Figure 126. HRMS of 1s.

Title wyz7-107-1-h1  
Solvent CDCl3  
Spectrometer Frequency 499.86

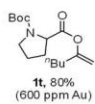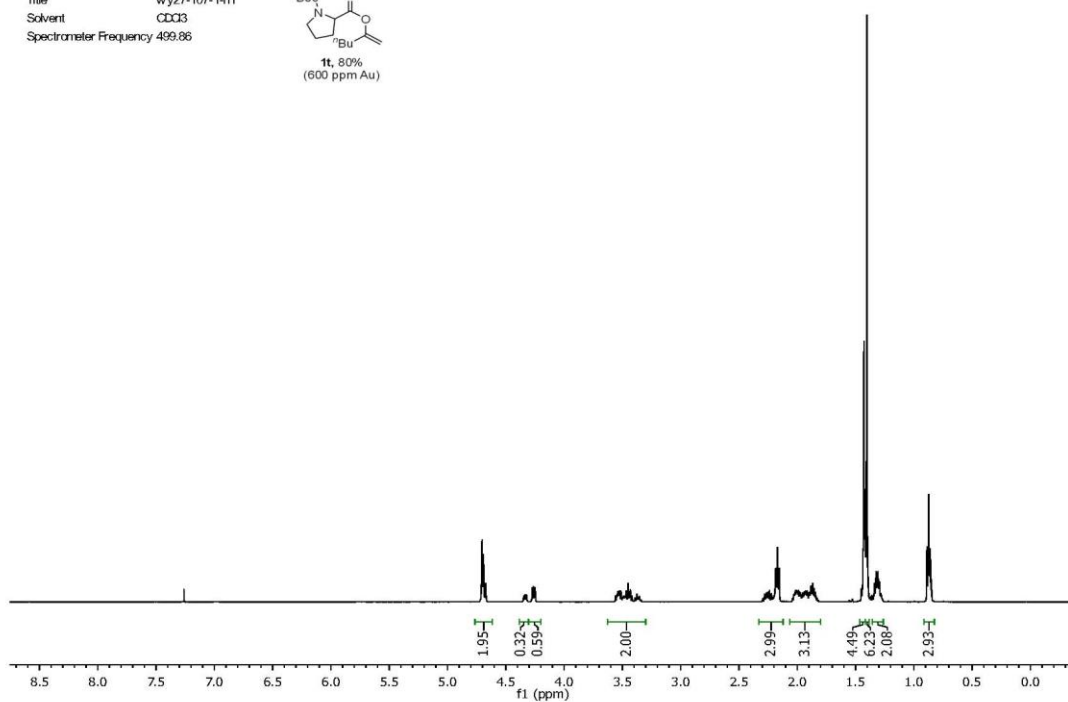

Supplementary Figure 127. <sup>1</sup>H NMR spectrum of **1t**.

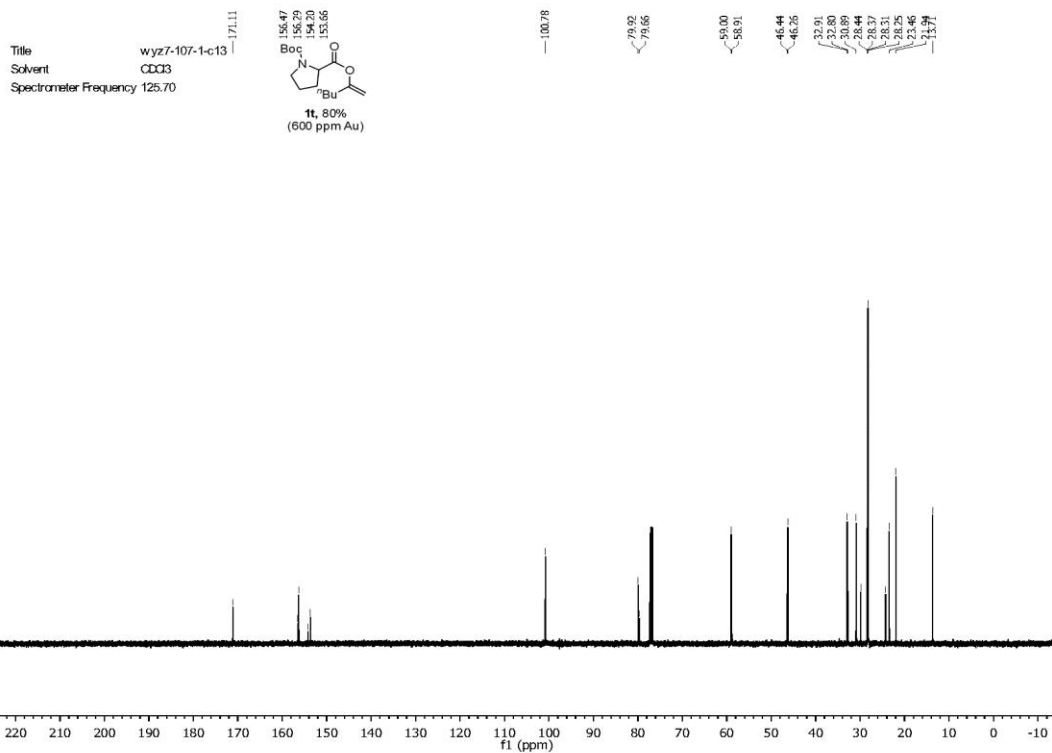

Supplementary Figure 128.  $^{13}\text{C}$  NMR spectrum of 1t.

Single Mass Analysis

Tolerance = 3.0 mDa / DBE: min = -1.5, max = 50.0

Selected filters: None

Monoisotopic Mass, Odd and Even Electron Ions

774 formula(e) evaluated with 12 results within limits (all results (up to 1000) for each mass)

Elements Used:

C: 0-100 H: 0-100 N: 0-10 O: 0-10 Na: 0-1

Wang/Zhang, wyz1T, mw 297; ESI+

ZHA101513MN 437 (8.110) Cn (Cen,4, 60.00, Ar); Sm (SG, 4x3.00); Cm (432.490)

UCSB CHEM BIOCHEM QTOF2  
TOF MS ES+  
2.25e3

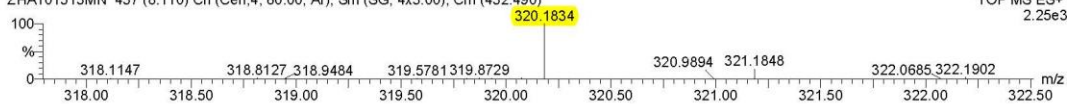

Minimum: -1.5  
Maximum: 3.0 10.0 50.0

| Mass     | Calc. Mass | mDa  | PPM  | DBE  | i-FIT | Formula          |
|----------|------------|------|------|------|-------|------------------|
| 320.1834 | 320.1835   | -0.1 | -0.3 | 2.0  | 2.1   | C15 H28 O7       |
|          | 320.1835   | -0.1 | -0.3 | 7.5  | 7.6   | C14 H22 N7 O2    |
|          | 320.1838   | -0.4 | -1.2 | 3.5  | 4.2   | C16 H27 N O4 Na  |
|          | 320.1824   | 1.0  | 3.1  | 4.0  | 7.5   | C14 H25 N4 O3 Na |
|          | 320.1822   | 1.2  | 3.7  | 2.5  | 6.2   | C13 H26 N3 O6    |
|          | 320.1822   | 1.2  | 3.7  | 8.0  | 12.3  | C12 H20 N10 O    |
|          | 320.1848   | -1.4 | -4.4 | 7.0  | 5.6   | C16 H24 N4 O3    |
|          | 320.1851   | -1.7 | -5.3 | 8.5  | 11.6  | C17 H23 N5 Na    |
|          | 320.1811   | 2.3  | 7.2  | 4.5  | 13.5  | C12 H23 N7 O2 Na |
|          | 320.1811   | 2.3  | 7.2  | -1.0 | 8.9   | C13 H29 O7 Na    |
|          | 320.1808   | 2.6  | 8.1  | 3.0  | 13.0  | C11 H24 N6 O5    |
|          | 320.1862   | -2.8 | -8.7 | 6.5  | 6.3   | C18 H26 N O4     |

Supplementary Figure 129. HRMS of 1t.

Parameter Value  
Title wvz8-31-1-h1  
Solvent CDCl3  
Spectrometer Frequency 499.86  
Nucleus 1H

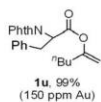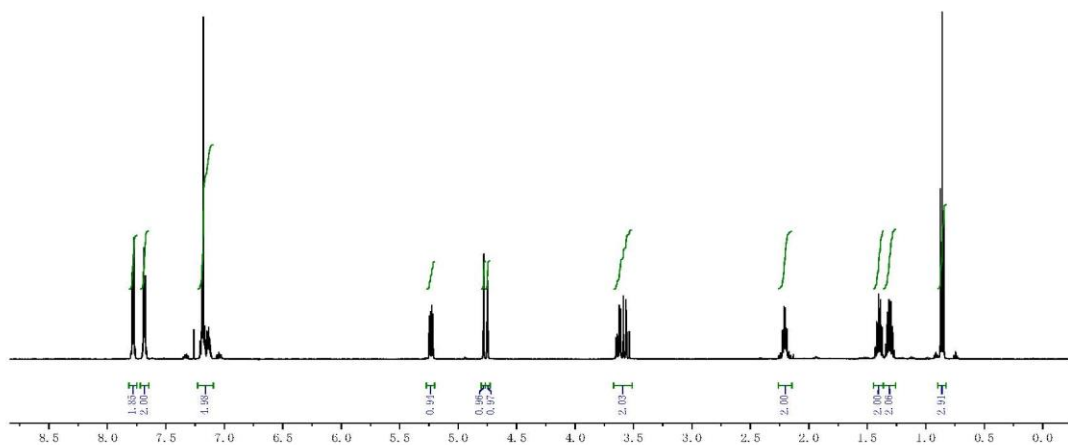

Supplementary Figure 130. <sup>1</sup>H NMR spectrum of **1u**.



Parameter Value  
Title wyz8-31-1-c13  
Solvent CDCl3  
Spectrometer Frequency 125.70  
Nucleus 13C

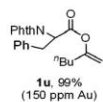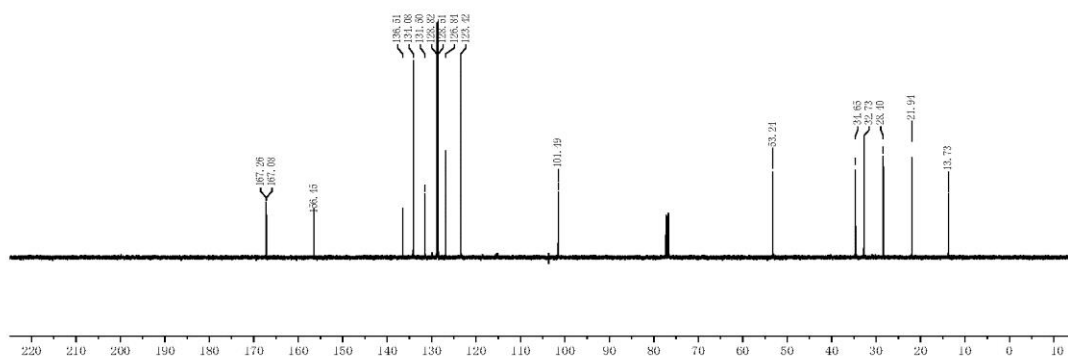

Supplementary Figure 131. <sup>13</sup>C NMR spectrum of **1u**.

## Single Mass Analysis

Tolerance = 3.0 mDa / DBE: min = -1.5, max = 50.0

Selected filters: None

Monoisotopic Mass, Even Electron Ions

1010 formula(e) evaluated with 7 results within limits (all results (up to 1000) for each mass)

Elements Used:

C: 0-100 H: 0-100 N: 0-10 O: 0-10 Na: 0-1

Wang/Zhang, wyz1u, 377, ESI+/TOF

ZHA101613MC 793 (15.017) Cn (Cen, 4, 60.00, Ar); Sm (SG, 4x3.00); Cm (677:920)

UCSB CHEM BIOCHEM QTOF2  
TOF MS ES+  
1.25e4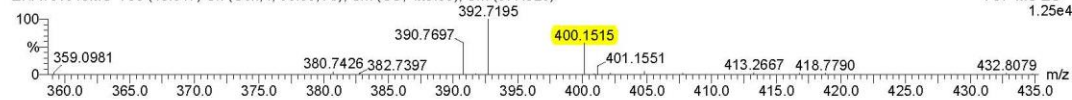

Minimum: -1.5  
Maximum: 50.0

| Mass     | Calc. Mass | mDa  | PPM  | DBE  | i-FIT | Formula          |
|----------|------------|------|------|------|-------|------------------|
| 400.1515 | 400.1516   | -0.1 | -0.2 | 0.5  | 294.4 | C7 H23 N9 O9 Na  |
|          | 400.1509   | 0.6  | 1.5  | 11.5 | 9.7   | C20 H22 N3 O6    |
|          | 400.1522   | -0.7 | -1.7 | 16.5 | 9.4   | C21 H18 N7 O2    |
|          | 400.1525   | -1.0 | -2.5 | 12.5 | 4.0   | C23 H23 N O4 Na  |
|          | 400.1498   | 1.7  | 4.2  | 13.5 | 23.3  | C19 H19 N7 O2 Na |
|          | 400.1538   | -2.3 | -5.7 | 17.5 | 15.6  | C24 H19 N5 Na    |
|          | 400.1540   | -2.5 | -6.2 | 3.5  | 208.6 | C9 H22 N9 O9     |

Supplementary Figure 132. HRMS of 1u.

Title            wyz7-63-h1  
Solvent         cdcl3  
Spectrometer Frequency 599.64

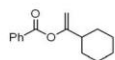

1v, 99%  
(100 ppm Au)

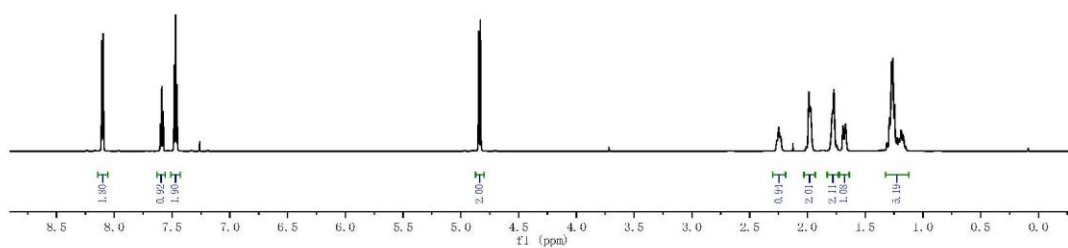

Supplementary Figure 133. <sup>1</sup>H NMR spectrum of 1v.

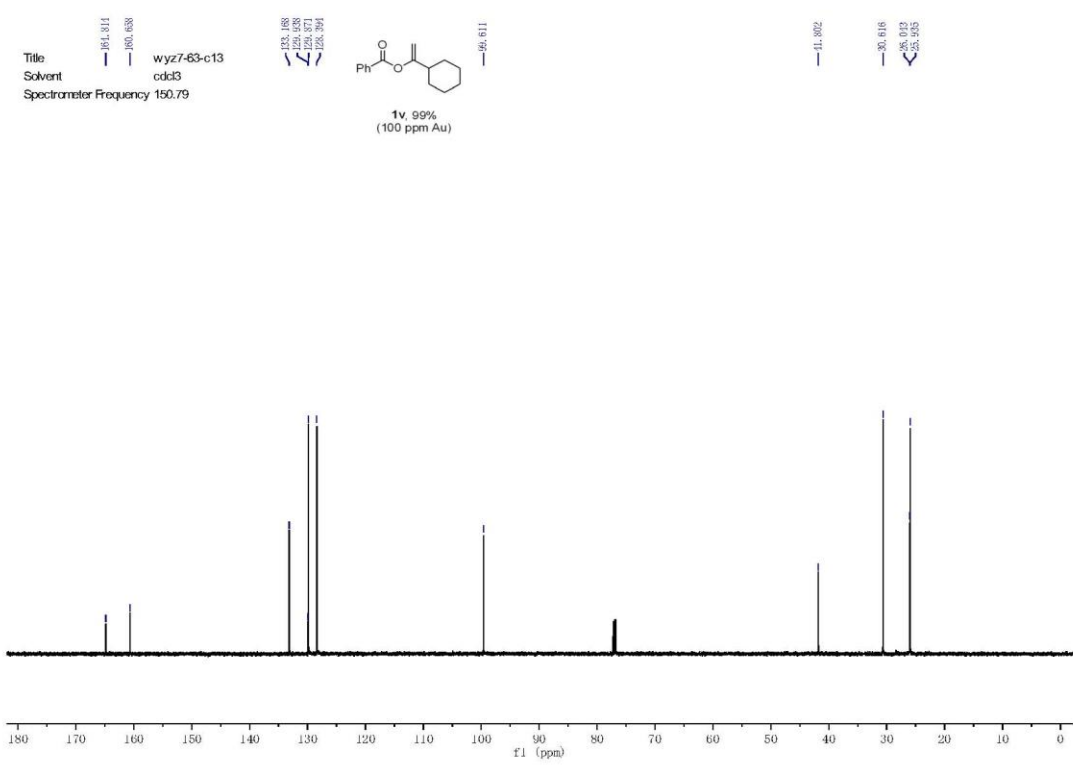

Supplementary Figure 134. <sup>13</sup>C NMR spectrum of 1v.

Single Mass Analysis

Tolerance = 3.0 mDa / DBE: min = -1.5, max = 50.0

Selected filters: None

Monoisotopic Mass, Odd and Even Electron Ions

549 formula(e) evaluated with 8 results within limits (all results (up to 1000) for each mass)

Elements Used:

C: 0-100 H: 0-100 N: 0-10 O: 0-10 Na: 0-1

Wang/Zhang, wyz1V, mw 230; ESI+

ZHA101513MO 139 (2.584) Cn (Cen,4, 60.00, Ar); Sm (SG, 4x3.00); Cm (136:159)

UCSB CHEM BIOCHEM QT02  
TOF MS ES+  
955

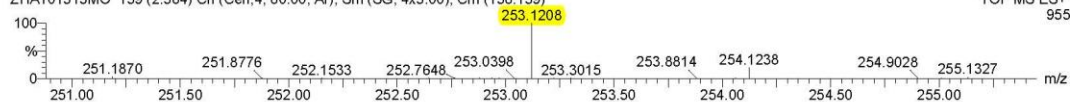

Minimum: -1.5  
Maximum: 3.0 10.0 50.0

| Mass     | Calc. Mass | mDa  | PPM   | DBE  | i-FIT | Formula         |
|----------|------------|------|-------|------|-------|-----------------|
| 253.1208 | 253.1204   | 0.4  | 1.6   | 6.5  | 3.2   | C15 H18 O2 Na   |
|          | 253.1202   | 0.6  | 2.4   | 10.5 | 5.1   | C13 H13 N6      |
|          | 253.1215   | -0.7 | -2.8  | 10.0 | 2.3   | C15 H15 N3 O    |
|          | 253.1223   | -1.5 | -5.9  | -1.0 | 52.0  | C2 H16 N9 O4 Na |
|          | 253.1191   | 1.7  | 6.7   | 7.0  | 6.7   | C13 H16 N3 O Na |
|          | 253.1188   | 2.0  | 7.9   | 5.5  | 8.2   | C12 H17 N2 O4   |
|          | 253.1229   | -2.1 | -8.3  | 9.5  | 0.8   | C17 H17 O2      |
|          | 253.1236   | -2.8 | -11.1 | -1.5 | 42.8  | C4 H18 N6 O5 Na |

Supplementary Figure 135. HRMS of 1v.

Title            wyz7-64-h1  
Solvent        cdCl3  
Spectrometer Frequency 599.64

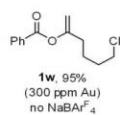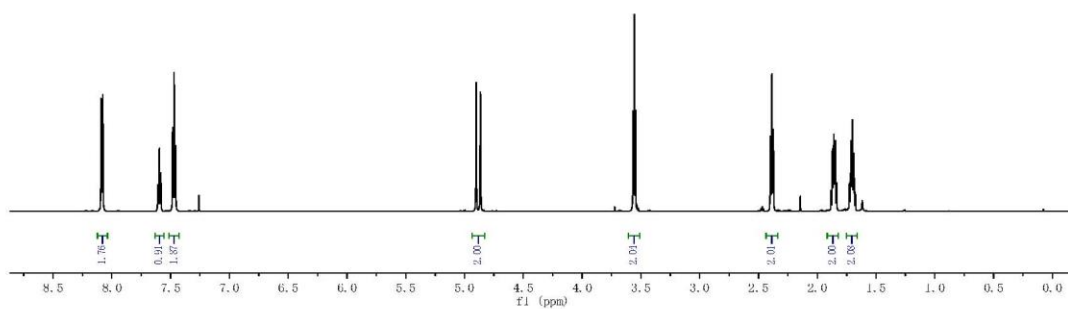

Supplementary Figure 136. <sup>1</sup>H NMR spectrum of **1w**.

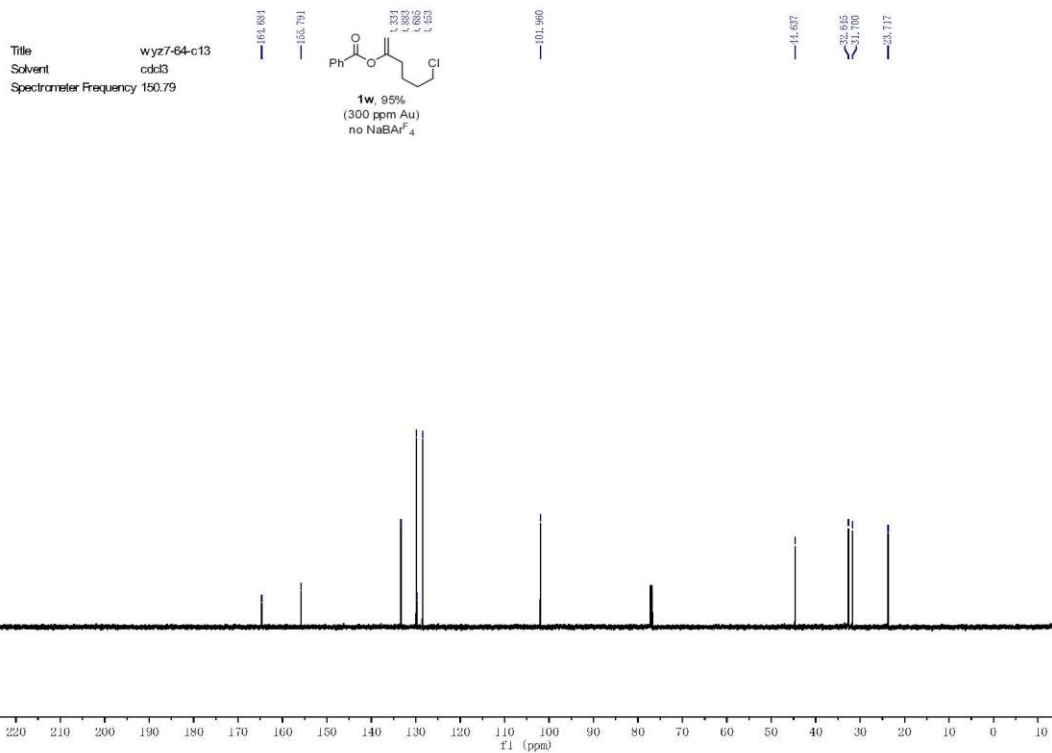

Supplementary Figure 137. <sup>13</sup>C NMR spectrum of 1w.

Single Mass Analysis

Tolerance = 3.0 mDa / DBE: min = -1.5, max = 50.0

Selected filters: None

Monoisotopic Mass, Even Electron Ions

1320 formula(e) evaluated with 16 results within limits (all results (up to 1000) for each mass)

Elements Used:

C: 0-100 H: 0-100 N: 0-10 O: 0-10 Na: 0-1 Cl: 0-2

Wang/Zhang, wyz1W, mw 238; ESI+

ZHA101513MM 226 (4.200) Cn (Cen,4, 60.00, Ar); Sm (SG, 4x3.00); Cm (206;241)

UCSB CHEM BIOCHEM QTOF2  
TOF MS ES+  
4.37e3

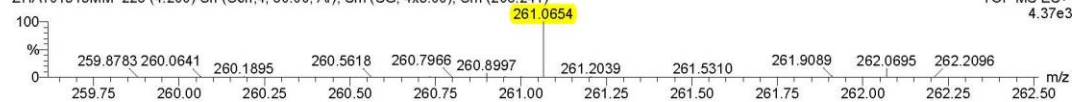

Minimum: -1.5  
Maximum: 3.0 10.0 50.0

| Mass     | Calc. Mass | mDa  | PPM   | DBE  | i-FIT     | Formula          |
|----------|------------|------|-------|------|-----------|------------------|
| 261.0654 | 261.0655   | -0.1 | -0.4  | 9.5  | 2775524.3 | C11 H10 N6 Cl    |
|          | 261.0656   | -0.2 | -0.8  | 1.5  | 2774297.5 | H9 N10 O7        |
|          | 261.0650   | 0.4  | 1.5   | 1.5  | 2775530.8 | C8 H16 N4 Na Cl2 |
|          | 261.0658   | -0.4 | -1.5  | 5.5  | 2775524.3 | C13 H15 O2 Na Cl |
|          | 261.0660   | -0.6 | -2.3  | -0.5 | 2775530.5 | C9 H19 O4 Cl2    |
|          | 261.0664   | -1.0 | -3.8  | 13.5 | 2774498.3 | C16 H9 N2 O2     |
|          | 261.0642   | 1.2  | 4.6   | 4.5  | 2775525.3 | C10 H14 N2 O4 Cl |
|          | 261.0640   | 1.4  | 5.4   | 10.5 | 2774267.8 | C14 H10 N2 O2 Na |
|          | 261.0637   | 1.7  | 6.5   | 14.5 | 2773916.0 | C12 H5 N8        |
|          | 261.0672   | -1.8 | -6.9  | 2.5  | 2774000.0 | C3 H10 N8 O5 Na  |
|          | 261.0674   | -2.0 | -7.7  | 4.5  | 2775531.3 | C10 H15 N4 Cl2   |
|          | 261.0634   | 2.0  | 7.7   | 0.5  | 2775531.8 | C5 H15 N6 O2 Cl2 |
|          | 261.0631   | 2.3  | 8.8   | 6.5  | 2775525.8 | C9 H11 N6 Na Cl  |
|          | 261.0680   | -2.6 | -10.0 | 14.5 | 2774530.0 | C19 H10 Na       |
|          | 261.0682   | -2.8 | -10.7 | 8.5  | 2775525.8 | C15 H14 O2 Cl    |
|          | 261.0683   | -2.9 | -11.1 | 0.5  | 2774600.8 | C4 H13 N4 O9     |

Supplementary Figure 138. HRMS of 1w.



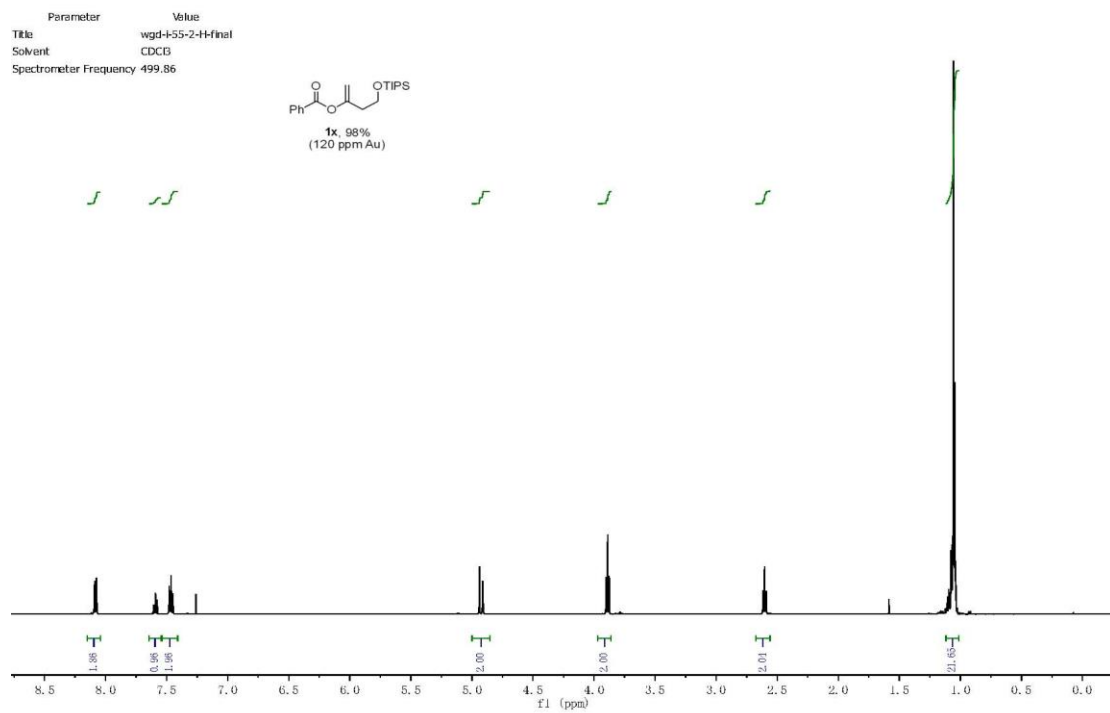

**Supplementary Figure 139.** <sup>1</sup>H NMR spectrum of **1x**.

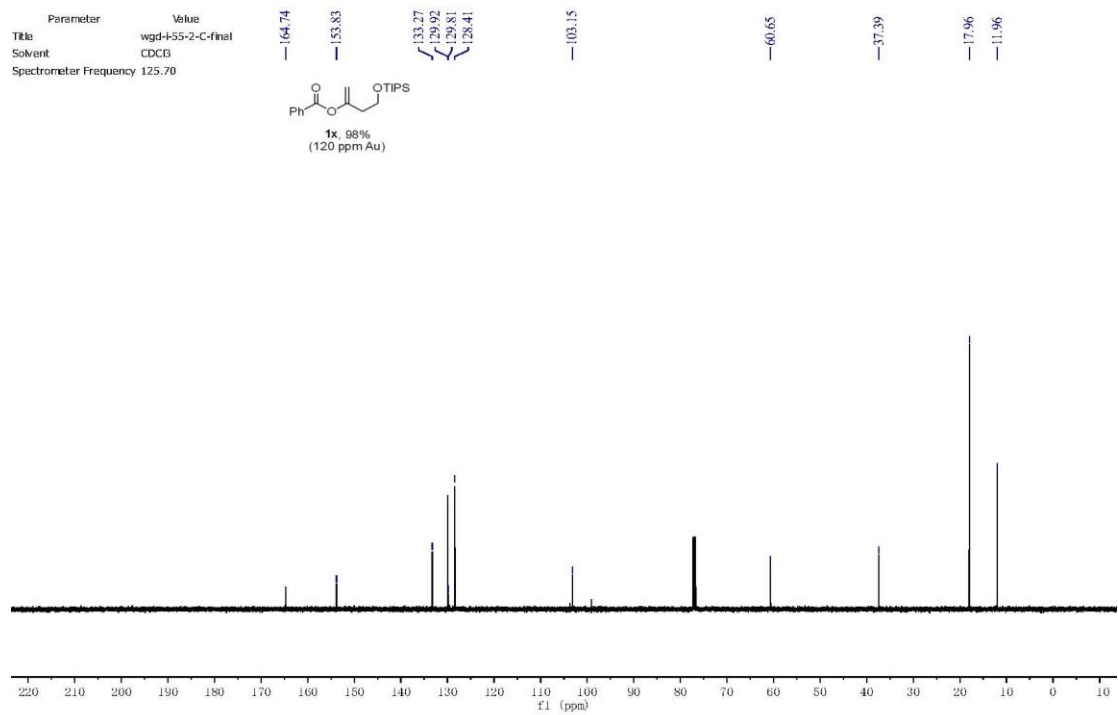

**Supplementary Figure 140.** <sup>13</sup>C NMR spectrum of **1x**.

Single Mass Analysis

Tolerance = 3.0 mDa / DBE: min = -1.5, max = 50.0

Selected filters: None

Monoisotopic Mass, Even Electron Ions

2628 formula(e) evaluated with 17 results within limits (all results (up to 1000) for each mass)

Elements Used:

C: 0-100 H: 0-100 N: 0-10 O: 0-10 Na: 0-1 Si: 0-2

Wang/Zhang, wyz1X, mw 348; ESI+

ZHA102413MF 633 (11.984) Cn (Cen,4, 60.00, Ar); Sm (SG, 4x3.00); Cm (626.731)

UCSB CHEM BIOCHEM QTOF2  
TOF MS ES+  
5.30e3

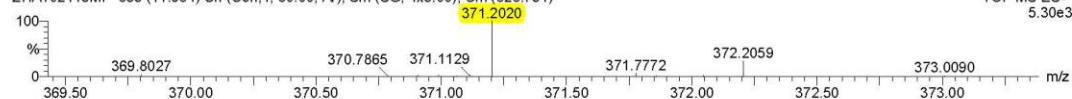

Minimum: -1.5  
Maximum: 3.0 10.0 50.0

| Mass     | Calc. Mass | mDa  | PPM  | DBE  | i-FIT     | Formula              |
|----------|------------|------|------|------|-----------|----------------------|
| 371.2020 | 371.2019   | 0.1  | 0.3  | 2.5  | 2775492.0 | C13 H28 N6 O5 Na     |
|          | 371.2018   | 0.2  | 0.5  | 5.5  | 2776246.5 | C20 H32 O3 Na Si     |
|          | 371.2023   | -0.3 | -0.8 | 1.5  | 2776312.3 | C12 H32 N6 O2 Na Si2 |
|          | 371.2016   | 0.4  | 1.1  | 9.5  | 2776230.0 | C18 H27 N6 O Si      |
|          | 371.2011   | 0.9  | 2.4  | 13.5 | 2776014.0 | C26 H27 O2           |
|          | 371.2030   | -1.0 | -2.7 | 0.5  | 2775806.0 | C14 H31 N2 O9        |
|          | 371.2032   | -1.2 | -3.2 | 7.5  | 2775223.0 | C14 H24 N10 O Na     |
|          | 371.2007   | 1.3  | 3.5  | 0.5  | 2776312.5 | C9 H31 N8 O4 Si2     |
|          | 371.2034   | -1.4 | -3.8 | -0.5 | 2776323.0 | C13 H35 N2 O6 Si2    |
|          | 371.2003   | 1.7  | 4.6  | 1.5  | 2775530.8 | C10 H27 N8 O7        |
|          | 371.2002   | 1.8  | 4.8  | 4.5  | 2776243.3 | C17 H31 N2 O5 Si     |
|          | 371.2042   | -2.2 | -5.9 | 8.5  | 2776263.3 | C22 H31 O3 Si        |
|          | 371.2043   | -2.3 | -6.2 | 5.5  | 2775651.8 | C15 H27 N6 O5        |
|          | 371.2046   | -2.6 | -7.0 | 1.5  | 2775799.5 | C17 H32 O7 Na        |
|          | 371.2047   | -2.7 | -7.3 | 4.5  | 2776318.8 | C14 H31 N6 O2 Si2    |
|          | 371.1992   | 2.8  | 7.5  | 6.5  | 2776209.8 | C16 H28 N6 O Na Si   |
|          | 371.2050   | -3.0 | -8.1 | 0.5  | 2776324.3 | C16 H36 O4 Na Si2    |

Supplementary Figure 141. HRMS of 1x.

Parameter Value  
Title wvz8-42-5-H1  
Solvent CDCl3  
Spectrometer Frequency 499.86  
Nucleus 1H

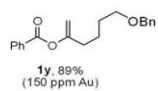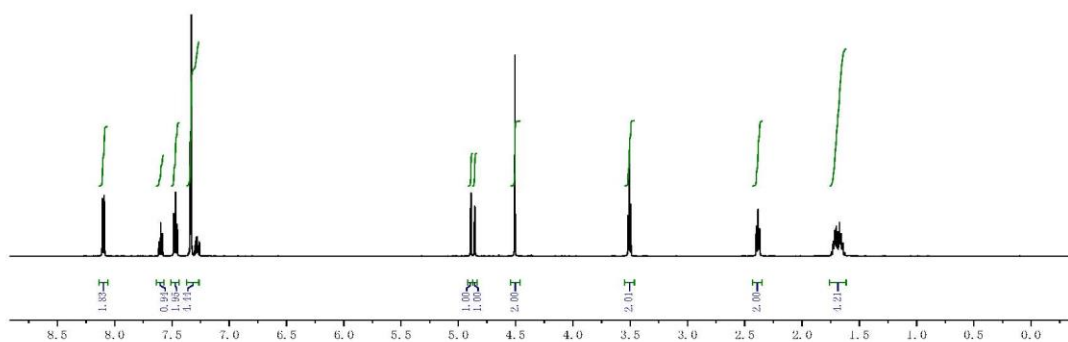

Supplementary Figure 142. <sup>1</sup>H NMR spectrum of 1y.

Parameter Value  
Title wyz8-42-5-C13  
Solvent CDCl3  
Spectrometer Frequency 125.70  
Nucleus 13C

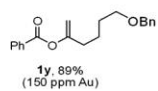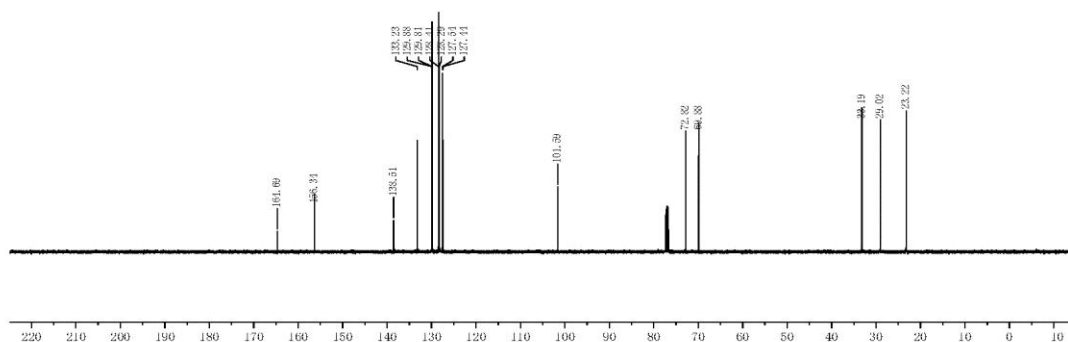

Supplementary Figure 143.  $^{13}\text{C}$  NMR spectrum of **1y**.

Single Mass Analysis

Tolerance = 3.0 mDa / DBE: min = -1.5, max = 50.0

Selected filters: None

Monoisotopic Mass, Even Electron Ions

815 formula(e) evaluated with 7 results within limits (all results (up to 1000) for each mass)

Elements Used:

C: 0-100 H: 0-100 N: 0-10 O: 0-10 Na: 0-1

Wang/Zhang, wuz1y, 282, ESI+/TOF

ZHA101613MD 911 (17.313) Cn (Cen, 4, 60.00, Ar); Sm (SG, 4x3.00); Cm (654:919)

UCSB CHEM BIOCHEM QTOF2  
TOF MS ES+  
2.40e4

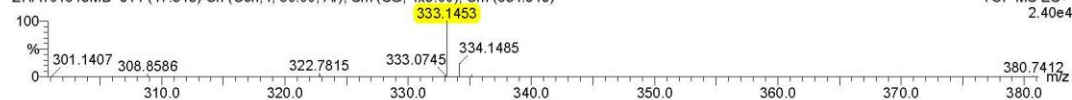

Minimum: -1.5  
Maximum: 3.0 10.0 50.0

| Mass     | Calc. Mass | mDa  | PPM  | DBE  | i-FIT | Formula          |
|----------|------------|------|------|------|-------|------------------|
| 333.1453 | 333.1450   | 0.3  | 0.9  | 8.5  | 63.4  | C17 H21 N2 O5    |
|          | 333.1464   | -1.1 | -3.3 | 13.5 | 53.4  | C18 H17 N6 O     |
|          | 333.1440   | 1.3  | 3.9  | 10.5 | 124.5 | C16 H18 N6 O Na  |
|          | 333.1467   | -1.4 | -4.2 | 9.5  | 25.3  | C20 H22 O3 Na    |
|          | 333.1426   | 2.7  | 8.1  | 5.5  | 176.1 | C15 H22 N2 O5 Na |
|          | 333.1424   | 2.9  | 8.7  | 9.5  | 227.5 | C13 H17 N8 O3    |
|          | 333.1482   | -2.9 | -8.7 | 0.5  | 911.5 | C6 H21 N8 O8     |

Supplementary Figure 144. HRMS of 1y.

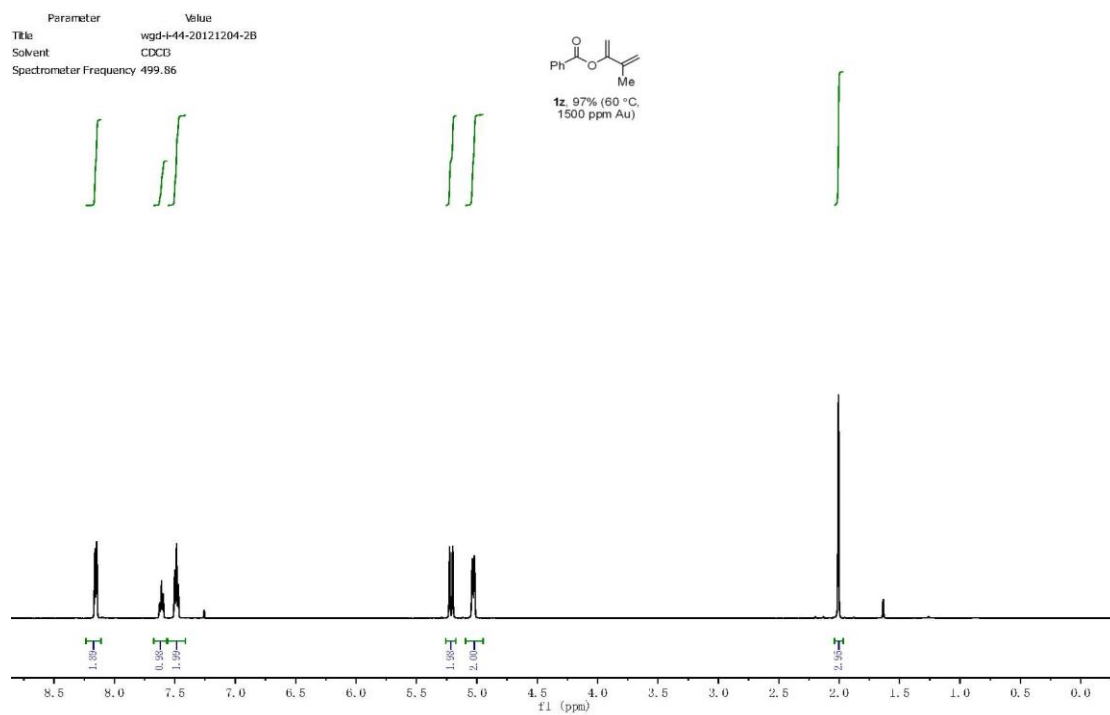

**Supplementary Figure 145. <sup>1</sup>H NMR spectrum of 1z.**

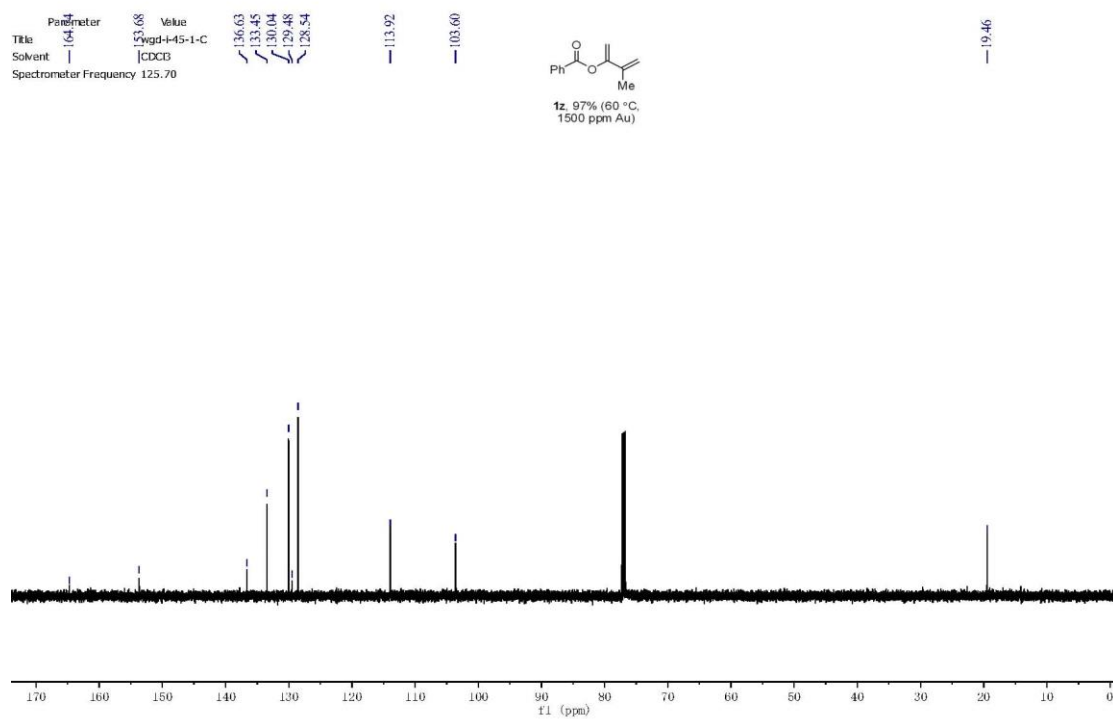

**Supplementary Figure 146.** <sup>13</sup>C NMR spectrum of **1z**.



## Single Mass Analysis

Tolerance = 3.0 mDa / DBE: min = -1.5, max = 200.0

Element prediction: Off

Monoisotopic Mass, Odd and Even Electron Ions

179 formula(e) evaluated with 3 results within limits (all results (up to 1000) for each mass)

Elements Used:

C: 0-100 H: 0-200 N: 0-10 O: 0-10

Wang/Zhang, wyz1z, mw 188, EI+

ZHA102913PA 274 (4.570) Cn (Cen,3, 80.00, Ar); Sm (SG, 4x3.00); Cm (274:389)

UCSB Chem\_Biochem GCT Premier  
TOF MS EI+  
6.83e+003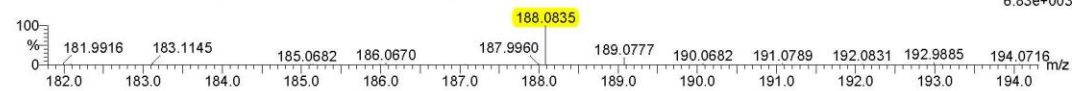

Minimum: -1.5  
Maximum: 200.0

| Mass     | Calc. Mass | mDa  | PPM  | DBE | i-FIT | Formula      |
|----------|------------|------|------|-----|-------|--------------|
| 188.0835 | 188.0837   | -0.2 | -1.1 | 7.0 | 79.8  | C12 H12 O2   |
|          | 188.0824   | 1.1  | 5.8  | 7.5 | 111.7 | C10 H10 N3 O |
|          | 188.0810   | 2.5  | 13.3 | 8.0 | 153.9 | C8 H8 N6     |

Supplementary Figure 147. HRMS of 1z.

Parameter Value  
Title wgd-55-1-H-4  
Solvent CDCl3  
Spectrometer Frequency 499.86

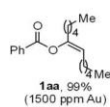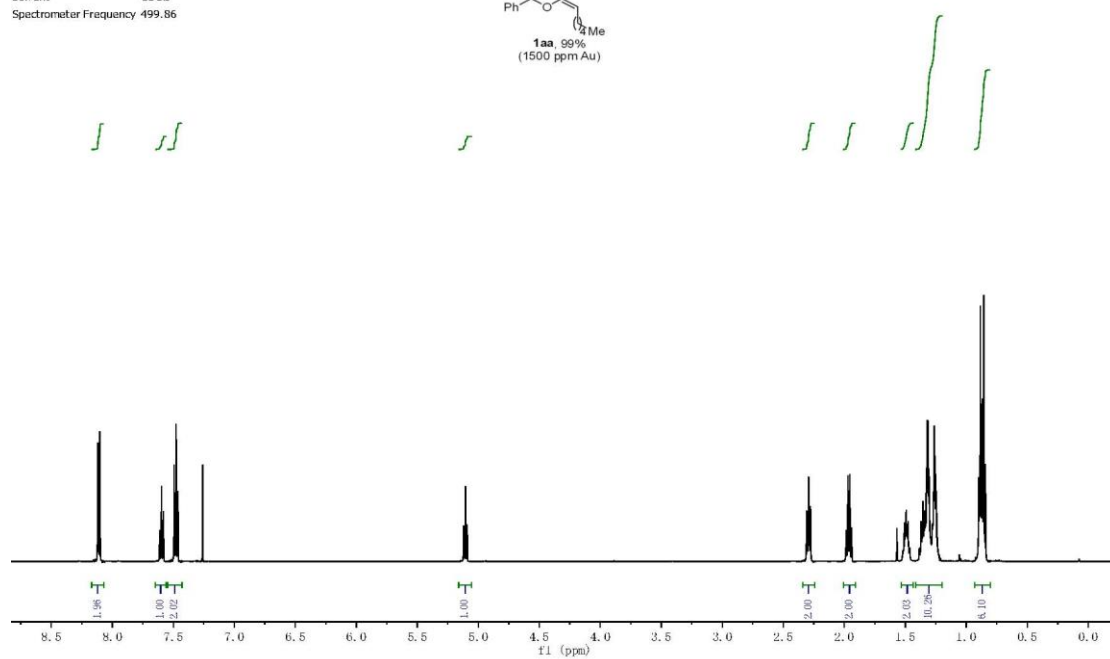

Supplementary Figure 148. <sup>1</sup>H NMR spectrum of 1aa.

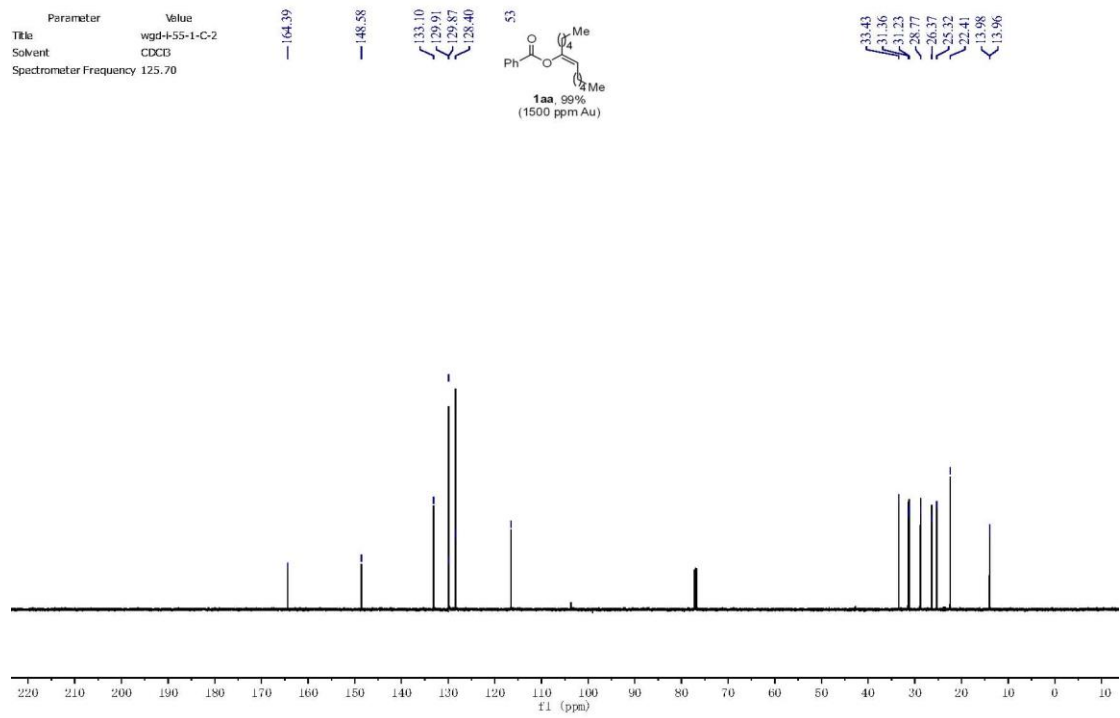

**Supplementary Figure 149.** <sup>13</sup>C NMR spectrum of 1aa.

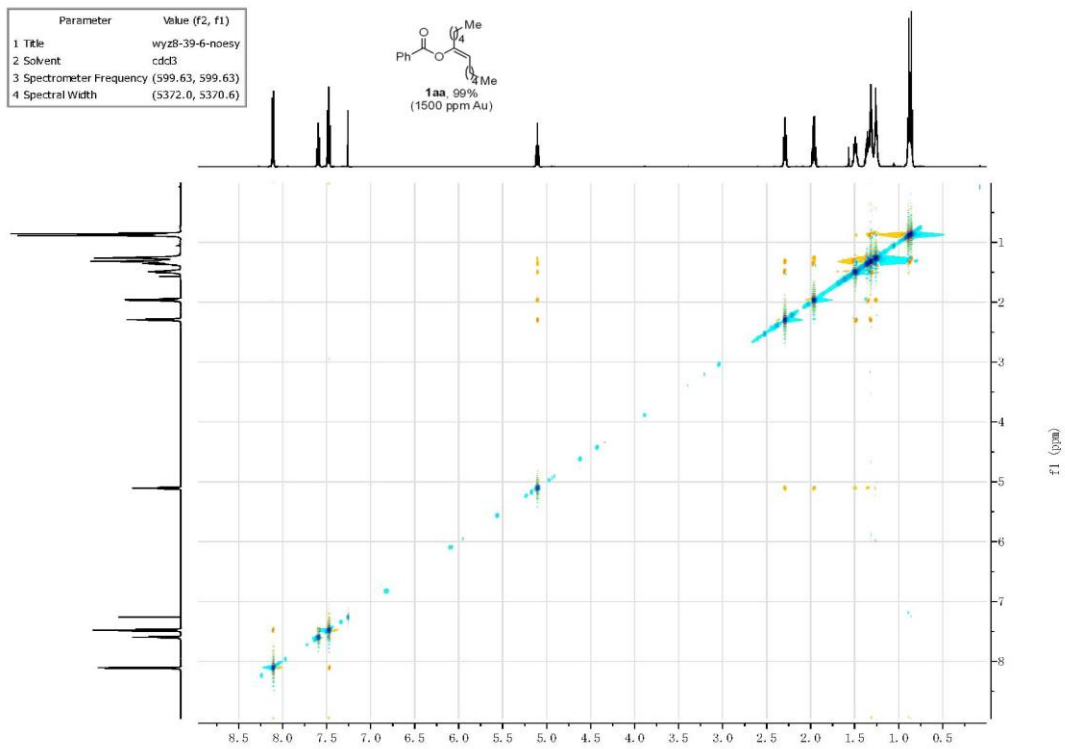

**Supplementary Figure 150.  $^1\text{H}$ - $^1\text{H}$  NOESY spectrum of 1aa.**

## Single Mass Analysis

Tolerance = 3.0 mDa / DBE: min = -1.5, max = 50.0

Selected filters: None

Monoisotopic Mass, Odd and Even Electron Ions

746 formula(e) evaluated with 7 results within limits (all results (up to 1000) for each mass)

Elements Used:

C: 0-100 H: 0-100 N: 0-10 O: 0-10 Na: 0-1

Wang/Zhang, wyz1aa, mw 288; ESI+

ZHA102413ME 472 (8.988) Cn (Cen,4, 60.00, Ar); Sm (SG, 4x3.00); Cm (450:481)

UCSB CHEM BIOCHEM QTOF2  
TOF MS ES+  
2.60e3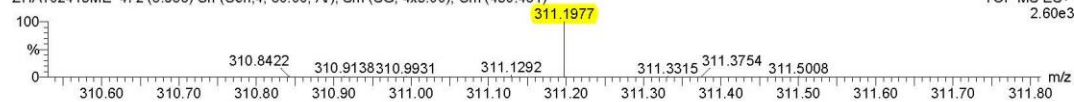

Minimum: -1.5  
Maximum: 50.0

| Mass     | Calc. Mass | mDa  | PPM  | DBE | i-FIT     | Formula         |
|----------|------------|------|------|-----|-----------|-----------------|
| 311.1977 | 311.1974   | 0.3  | 1.0  | 6.0 | 5547309.5 | C17 H26 N3 O Na |
|          | 311.1971   | 0.6  | 1.9  | 4.5 | 5547307.5 | C16 H27 N2 O4   |
|          | 311.1984   | -0.7 | -2.2 | 9.5 | 5547310.5 | C17 H23 N6      |
|          | 311.1987   | -1.0 | -3.2 | 5.5 | 5547311.0 | C19 H28 O2 Na   |
|          | 311.1960   | 1.7  | 5.5  | 6.5 | 5547307.5 | C15 H24 N6 Na   |
|          | 311.1957   | 2.0  | 6.4  | 5.0 | 5547305.5 | C14 H25 N5 O3   |
|          | 311.1998   | -2.1 | -6.7 | 9.0 | 5547312.5 | C19 H25 N3 O    |

## Supplementary Figure 151. HRMS of 1aa.

| Parameter              | Value          |
|------------------------|----------------|
| Title                  | wyz8-40-6-HI   |
| Solvent                | CDCl3          |
| Spectrometer Frequency | 499.86         |
| Nucleus                | <sup>1</sup> H |

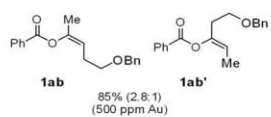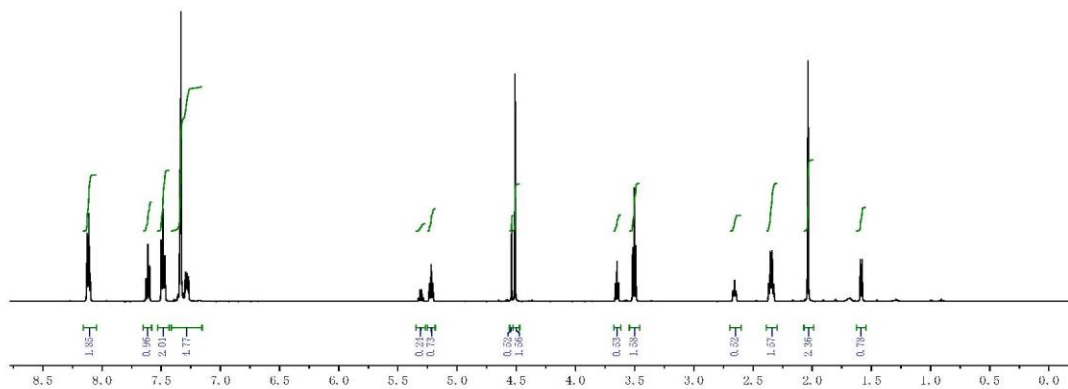

Supplementary Figure 152. <sup>1</sup>H NMR spectrum of mixture of 1ab and 1ab'.

| Parameter              | Value         |
|------------------------|---------------|
| Title                  | wyz8-40-6-C13 |
| Solvent                | CDCl3         |
| Spectrometer Frequency | 125.70        |
| Nucleus                | 13C           |

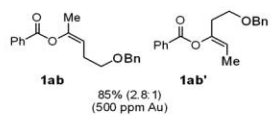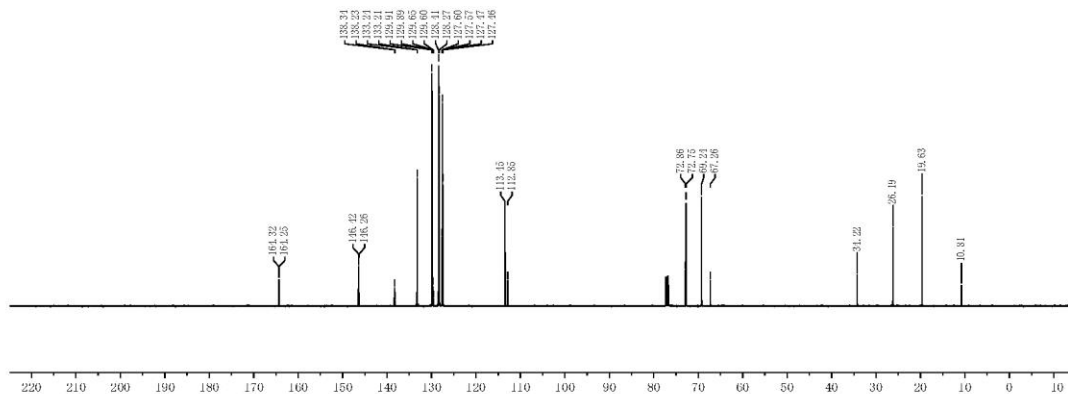

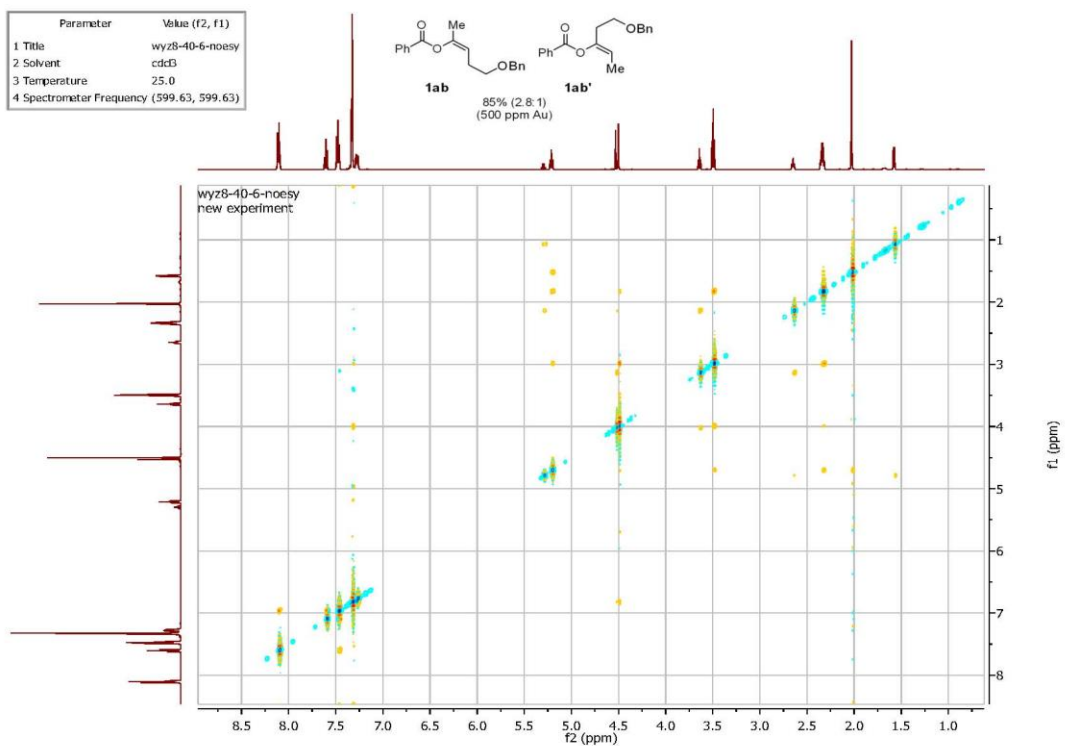

Supplementary Figure 154.  $^1\text{H}$ - $^1\text{H}$  NOESY of mixture of **1ab** and **1ab'**.



## Single Mass Analysis

Tolerance = 3.0 mDa / DBE: min = -1.5, max = 50.0

Selected filters: None

Monoisotopic Mass, Odd and Even Electron Ions

777 formula(e) evaluated with 13 results within limits (all results (up to 1000) for each mass)

Elements Used:

C: 0-100 H: 0-100 N: 0-10 O: 0-10 Na: 0-1

Wang/Zhang, wyz1AB, mw 296; ESI+

ZHA101513MP 381 (7.073) Cn (Cen,4, 60.00, Ar); Sm (SG, 4x3.00); Cm (371.410)

UCSB CHEM BIOCHEM QTOF2

TOF MS ES+

743

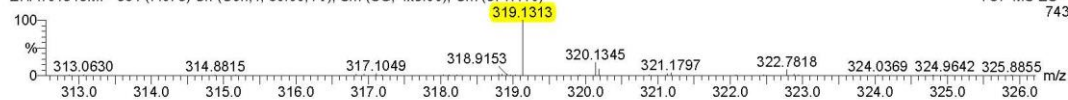

Minimum: -1.5  
Maximum: 3.0 10.0 50.0

| Mass     | Calc. Mass | mDa  | PPM  | DBE  | i-FIT | Formula          |
|----------|------------|------|------|------|-------|------------------|
| 319.1313 | 319.1310   | 0.3  | 0.9  | 9.5  | 0.6   | C19 H20 O3 Na    |
|          | 319.1307   | 0.6  | 1.9  | 13.5 | 1.3   | C17 H15 N6 O     |
|          | 319.1321   | -0.8 | -2.5 | 13.0 | 0.3   | C19 H17 N3 O2    |
|          | 319.1326   | -1.3 | -4.1 | 0.5  | 32.5  | C5 H19 N8 O8     |
|          | 319.1329   | -1.6 | -5.0 | 2.0  | 28.2  | C6 H18 N9 O5 Na  |
|          | 319.1297   | 1.6  | 5.0  | 10.0 | 2.0   | C17 H18 N3 O2 Na |
|          | 319.1294   | 1.9  | 6.0  | 14.0 | 3.2   | C15 H13 N9       |
|          | 319.1294   | 1.9  | 6.0  | 8.5  | 2.8   | C16 H19 N2 O5    |
|          | 319.1334   | -2.1 | -6.6 | 12.5 | 0.2   | C21 H19 O3       |
|          | 319.1337   | -2.4 | -7.5 | 14.0 | 0.7   | C22 H18 N Na     |
|          | 319.1339   | -2.6 | -8.1 | 0.0  | 26.6  | C7 H21 N5 O9     |
|          | 319.1342   | -2.9 | -9.1 | 1.5  | 22.5  | C8 H20 N6 O6 Na  |
|          | 319.1283   | 3.0  | 9.4  | 10.5 | 4.3   | C15 H16 N6 O Na  |

Supplementary Figure 155. HRMS of mixture of 1ab and 1ab'.

Title wyz7-126-h1  
Solvent CDCl3  
Spectrometer Frequency 499.86

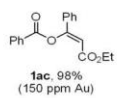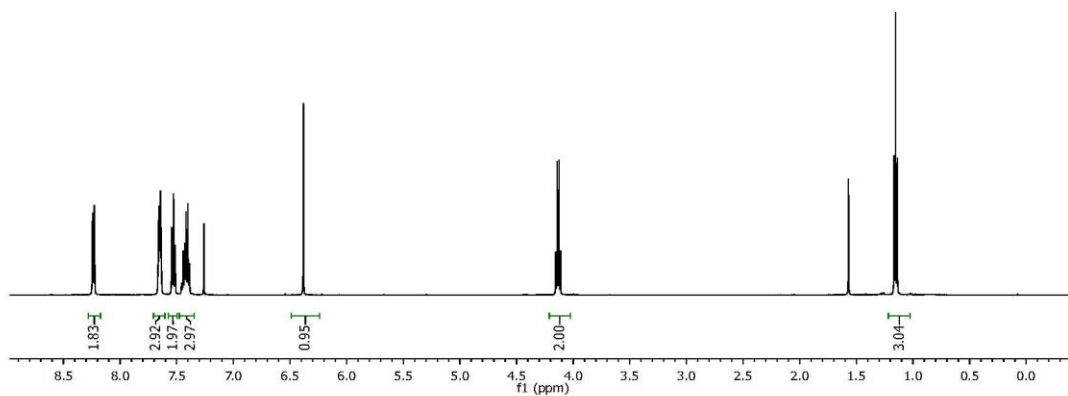

Supplementary Figure 156. <sup>1</sup>H NMR spectrum of 1ac.

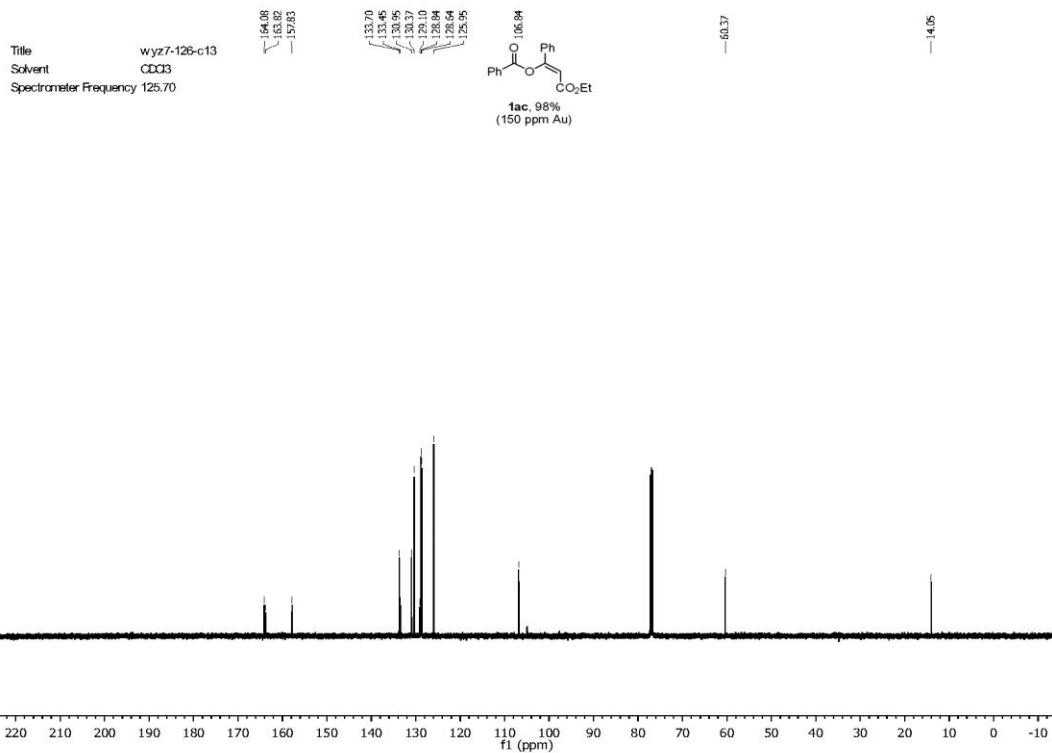

Supplementary Figure 157.  $^{13}\text{C}$  NMR spectrum of 1ac.

## Single Mass Analysis

Tolerance = 3.0 mDa / DBE: min = -1.5, max = 50.0

Selected filters: None

Monoisotopic Mass, Odd and Even Electron Ions

779 formula(e) evaluated with 13 results within limits (all results (up to 1000) for each mass)

Elements Used:

C: 0-100 H: 0-100 N: 0-10 O: 0-10 Na: 0-1

Wang/Zhang, wuz1AC, mw 296; ESI+

ZHA101513MQ 662 (12.279) Cn (Cen, 4, 60.00, Ar); Sm (SG, 4x3.00); Cm (650:668)

UCSB CHEM BIOCHEM QTOF2  
TOF MS ES+  
1.18e3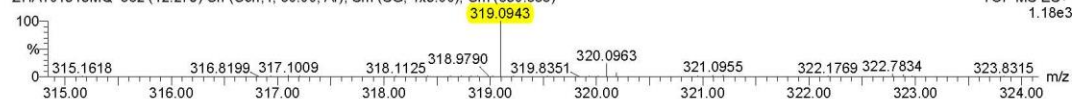

Minimum: -1.5  
Maximum: 3.0 10.0 50.0

| Mass     | Calc. Mass | mDa  | PPM  | DBE  | i-FIT | Formula          |
|----------|------------|------|------|------|-------|------------------|
| 319.0943 | 319.0943   | 0.0  | 0.0  | 14.5 | 2.0   | C16 H11 N6 O2    |
|          | 319.0946   | -0.3 | -0.9 | 10.5 | 1.5   | C18 H16 O4 Na    |
|          | 319.0938   | 0.5  | 1.6  | -1.5 | 76.4  | C2 H16 N8 O9 Na  |
|          | 319.0933   | 1.0  | 3.1  | 11.0 | 3.4   | C16 H14 N3 O3 Na |
|          | 319.0930   | 1.3  | 4.1  | 15.0 | 4.8   | C14 H9 N9 O      |
|          | 319.0930   | 1.3  | 4.1  | 9.5  | 5.9   | C15 H15 N2 O6    |
|          | 319.0957   | -1.4 | -4.4 | 14.0 | 0.7   | C18 H13 N3 O3    |
|          | 319.0960   | -1.7 | -5.3 | 15.5 | 0.4   | C19 H12 N4 Na    |
|          | 319.0962   | -1.9 | -6.0 | 1.5  | 57.2  | C4 H15 N8 O9     |
|          | 319.0965   | -2.2 | -6.9 | 3.0  | 48.9  | C5 H14 N9 O6 Na  |
|          | 319.0919   | 2.4  | 7.5  | 11.5 | 7.0   | C14 H12 N6 O2 Na |
|          | 319.0917   | 2.6  | 8.1  | 10.0 | 9.6   | C13 H13 N5 O5    |
|          | 319.0970   | -2.7 | -8.5 | 13.5 | 0.9   | C20 H15 O4       |

Supplementary Figure 158. HRMS of 1ac.

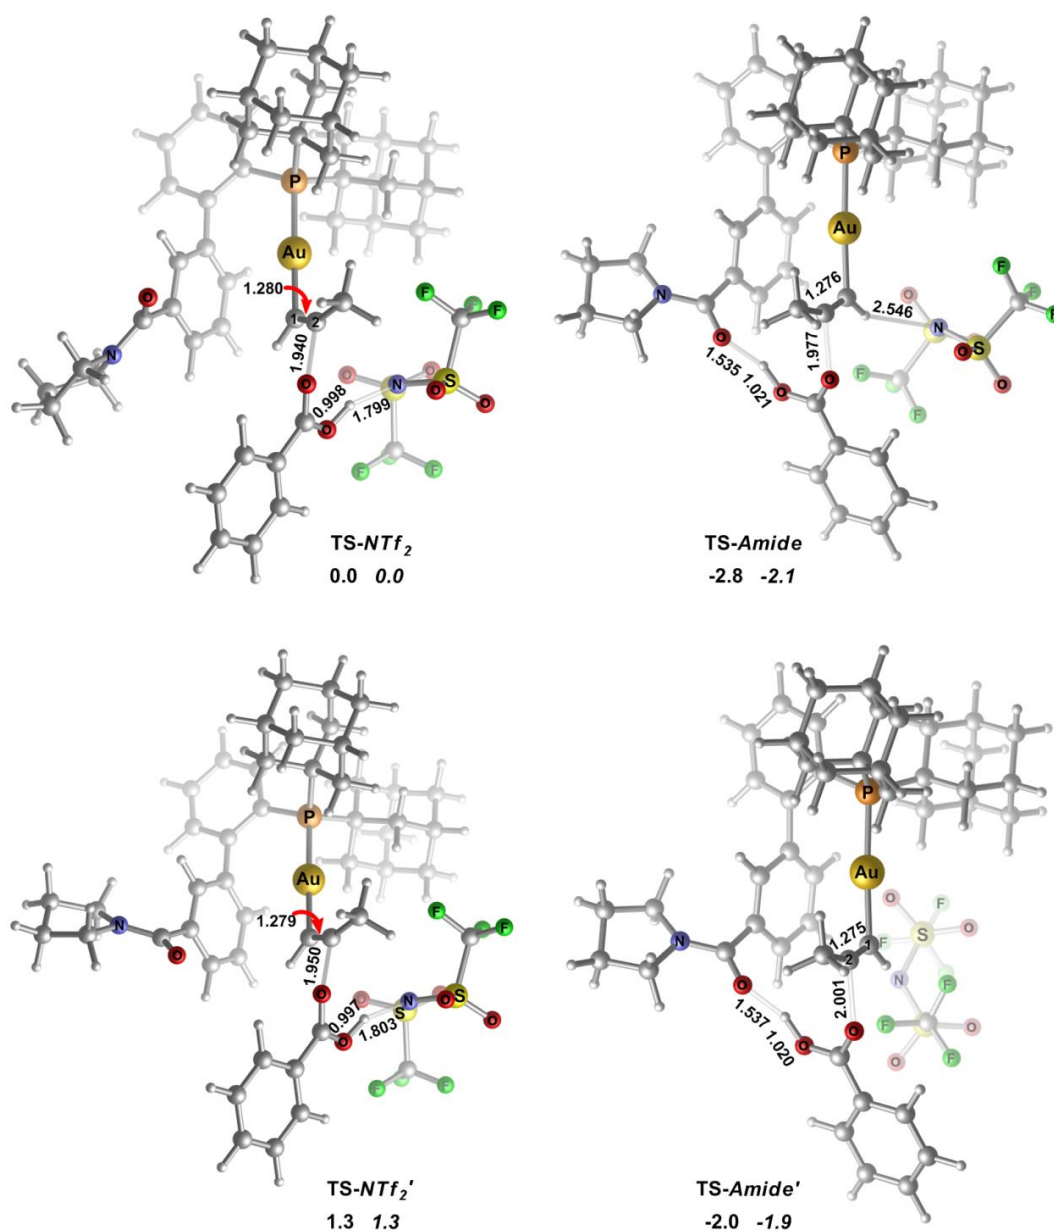

Supplementary Figure 159. The optimized NTf<sub>2</sub><sup>-</sup> activated transition states (TS-NTf<sub>2</sub> and TS-NTf<sub>2</sub>') and the amide group activated transition states (TS-Amide and TS-Amide'). The selected bond lengths are in angstroms, the relative energies  $\Delta E_{\text{sol}}$  and free energies  $\Delta G_{\text{sol}}$  (in italic, 298K) in dichloroethane are in kcal/mol.

**Supplementary Table 1. Crystal data and structure refinement for 12202013\_0m.**

|                                   |                                                                                                         |
|-----------------------------------|---------------------------------------------------------------------------------------------------------|
| Identification code               | 12202013_0m                                                                                             |
| Empirical formula                 | C <sub>37</sub> H <sub>46</sub> Au Cl N O P                                                             |
| Formula weight                    | 784.13                                                                                                  |
| Temperature                       | 106(2) K                                                                                                |
| Wavelength                        | 0.71073 Å                                                                                               |
| Crystal system                    | Monoclinic                                                                                              |
| Space group                       | P2(1)/n                                                                                                 |
| Unit cell dimensions              | a = 10.0233(5) Å      a = 90°<br>b = 18.3727(8) Å      b = 100.317(3)°<br>c = 17.3365(9) Å      g = 90° |
| Volume                            | 3141.0(3) Å <sup>3</sup>                                                                                |
| Z                                 | 4                                                                                                       |
| Density (calculated)              | 1.658 Mg/m <sup>3</sup>                                                                                 |
| Absorption coefficient            | 4.851 mm <sup>-1</sup>                                                                                  |
| F(000)                            | 1576                                                                                                    |
| Crystal size                      | 0.15 x 0.15 x 0.10 mm <sup>3</sup>                                                                      |
| Theta range for data collection   | 1.63 to 28.28°                                                                                          |
| Index ranges                      | -12 ≤ h ≤ 13, -23 ≤ k ≤ 24, -23 ≤ l ≤ 23                                                                |
| Reflections collected             | 21308                                                                                                   |
| Independent reflections           | 7773 [R(int) = 0.0372]                                                                                  |
| Completeness to theta = 28.28°    | 99.6 %                                                                                                  |
| Absorption correction             | Semi-empirical from equivalents                                                                         |
| Max. and min. transmission        | 0.7469 and 0.5890                                                                                       |
| Refinement method                 | Full-matrix least-squares on F <sup>2</sup>                                                             |
| Data / restraints / parameters    | 7773 / 0 / 379                                                                                          |
| Goodness-of-fit on F <sup>2</sup> | 1.018                                                                                                   |

Final R indices [ $I > 2\sigma(I)$ ]

R1 = 0.0248, wR2 = 0.0513

R indices (all data)

R1 = 0.0376, wR2 = 0.0549

Largest diff. peak and hole

0.884 and -0.597 e.Å<sup>-3</sup>

## Supplementary Methods

### General

Ethyl acetate (ACS grade), hexanes (ACS grade), diethyl ether (ACS grade), were purchased from Fisher Scientific and used without further purification. Anhydrous 1,2-dichloroethane were bought from Acros and used directly. Fluorobenzene was purchased from Synquest Labs, Inc and distilled over P<sub>2</sub>O<sub>5</sub> before use. Most commercially available carboxylic acids below 99.5% purify were recrystallized from distilled Fluorobenzene, and all commercially available alkynes were distilled over NaBH<sub>4</sub> before use. NaBAR<sup>F</sup><sub>4</sub> was purchased from Synquest Labs and dried by heating to 100 °C under high vacuum for overnight. Reactions were monitored by thin layer chromatography (TLC) using Silicycle precoated silica gel plates. Flash column chromatography was performed over Silicycle silica gel (230-400 mesh). <sup>1</sup>H NMR and <sup>13</sup>C NMR spectra were recorded on a Varian 500/600 MHz Unity plus spectrometer and a Varian 400 MHz spectrometer using residue solvent peaks as internal standards (CDCl<sub>3</sub>, <sup>1</sup>H: 7.26 ppm; <sup>13</sup>C: 77.00 ppm). Infrared spectra were recorded with a Perkin Elmer FT-IR spectrum 2000 spectrometer and are reported in reciprocal centimeter (cm<sup>-1</sup>). Mass spectra were recorded Micromass QTOF2 Quadrupole/Time-of-Flight Tandem mass spectrometer by electrospray method.



## General Procedure A: Synthesis of Ligands and Catalysts

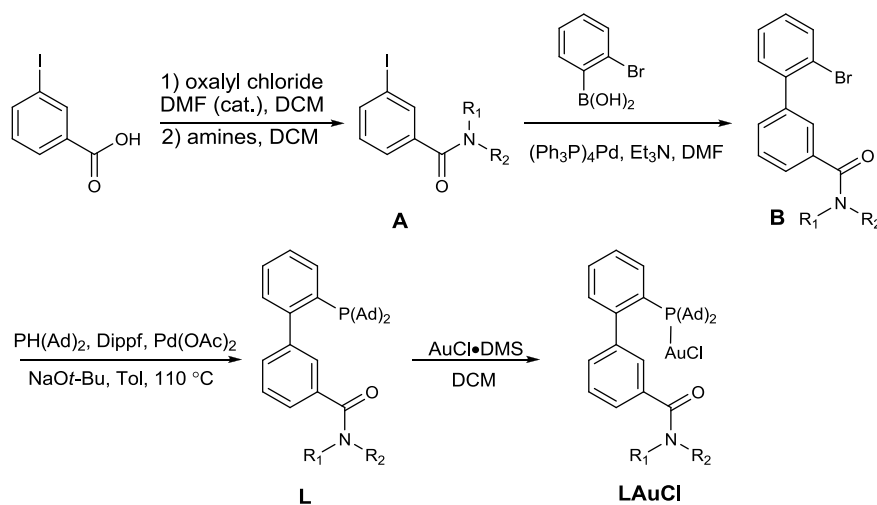

### Step1:

To a dispersion of 10 mmol 3-iodobenzoic acid (1 equiv) in 50 mL dry  $\text{CH}_2\text{Cl}_2$  was added 25 mmol oxalyl chloride (2.5 equiv) and three drops of DMF, and the mixture was stirred for 2 - 4 h at room temperature. The reaction mixture was evaporated under reduced pressure and dried under vacuum to yield 3-iodobenzoyl chloride, which was dissolved in 50 mL dry  $\text{CH}_2\text{Cl}_2$  again and cooled in an ice bath. A 10 mL  $\text{CH}_2\text{Cl}_2$  solution containing 15 mmol amine (1.5 equiv) and 20 mmol  $\text{Et}_3\text{N}$  (2 equiv) was then added and the reaction mixture was stirred at room temperature under a nitrogen atmosphere. After 1 h, the solution was treated with 50 mL water and 100 mL DCM, and the organic phase was separated, dried, evaporated, and then purified by column chromatography to yield compound **A** in 90 - 95% yield.

### Step2:

A mixture of 8 mmol **A** (1 equiv), 8.8 mmol 2-bromophenylboronic acid (1.1 equiv) and 24 mmol  $\text{Et}_3\text{N}$  (3 equiv) in 40 mL DMF was stirred and bubbled with  $\text{N}_2$  gas for 15 minutes, and then 0.4 mmol  $\text{Pd}(\text{PPh}_3)_4$  (5 mol %) was added; the reaction mixture was heated at  $90^\circ\text{C}$  for 4 - 8 h under nitrogen atmosphere. Once TLC indicated **A** was completely consumed, the reaction was diluted with 500 mL  $\text{Et}_2\text{O}$  and washed with water to remove DMF. Then the organic layer was dried over  $\text{MgSO}_4$ , filtrated, evaporated, and then purified by column chromatography to yield product **B** in 85 - 92% yield.

Step 3:

Under nitrogen atmosphere 2 mmol **B** (1 equiv), 0.1 mmol Pd(OAc)<sub>2</sub> (5 mol%), 0.12 mmol DiPPF (1,1'-bis(diisopropylphosphino)ferrocene, 6 mol%), 2.4 mmol NaOt-Bu (1.2 equiv) and 5 mL dry Toluene were added to a flamed dried Schlenk flask and the resulting suspension was stirred until apparently homogeneous (around 15 min). Added 2.2 mmol di(1-adamantyl)phosphine (1.1 equiv), the flask was heated at 110 °C in oil bath for 12 h, which then was cooled to room temperature, and purified by column chromatography without work-up to yield the final ligand **L** in 60 – 80% yield.

Step 4:

To a suspension of 1 mmol ligand **L** in 5 mL anhydrous DCM was added chloro(dimethylsulfide)gold(I) (294.5 mg, 1 mmol). The mixture was stirred for 30 min at room temperature and the solvent was evaporated off under reduced pressure to give the desired gold complex **LAuCl** in quantitative yield.

### 2'-(diadamantylphosphino)-N,N-dimethylbiphenyl-3-amine **L1**

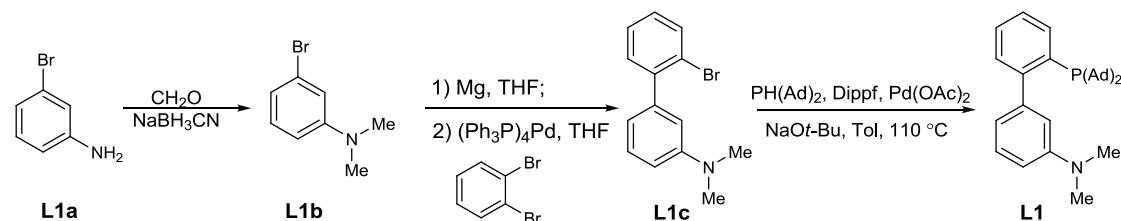

3-Bromo-*N,N*-dimethylaniline **L1b** was prepared according to the literature procedure<sup>[47]</sup> and biaryl compound **L1c** was obtained by using same literature procedure<sup>[48]</sup>. Ligand **L1** was then synthesized in 67% yield through general procedure A, step 3. <sup>1</sup>H NMR (500 MHz, CDCl<sub>3</sub>) δ 7.87 (d, *J* = 7.5 Hz, 1H), 7.40 – 7.27 (m, 3H), 7.24 – 7.18 (m, 1H), 6.74 – 6.67 (m, 1H), 6.62 – 6.55 (m, 2H), 2.95 (s, 6H), 1.90 (q, *J* = 12.2 Hz, 18H), 1.65 (s, 12H). <sup>13</sup>C NMR (125 MHz, CDCl<sub>3</sub>) δ 152.63 (d, *J* = 32.5 Hz), 149.27, 144.77 (d, *J* = 7.5 Hz), 136.45 (*J* = 3.8 Hz), 133.10 (d, *J* = 26.3 Hz), 130.41 (d, *J* = 6.2 Hz), 127.96, 127.70, 125.08, 119.16 (d, *J* = 3.0 Hz), 115.72 (d, *J* = 3.6 Hz), 110.65, 42.00, 41.95 (d, *J* = 13.1 Hz), 37.18 (d, *J* = 26.0 Hz), 36.98, 28.87 (d, *J* = 8.5 Hz). <sup>31</sup>P NMR (162 MHz, CDCl<sub>3</sub>) δ 22.26. IR (neat): 2901,

2847, 1602, 1584, 1498, 1449, 1343, 1301, 1047, 991, 955, 762, 743; HRMS ESI ( $m/z$ ): [MNa]<sup>+</sup> calcd. for C<sub>34</sub>H<sub>44</sub>NPNa, 520.3109; found, 520.3088.

### L1AuCl

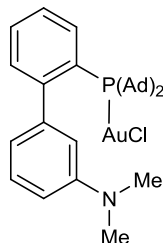

Au complex **L1AuCl** was obtained in quantitative yield according to general procedure A, step 4. <sup>1</sup>H NMR (600 MHz, CDCl<sub>3</sub>) δ 7.84 (t,  $J = 7.6$  Hz, 1H), 7.48 (dt,  $J = 21.5, 7.4$  Hz, 2H), 7.37 – 7.33 (m, 1H), 7.28 (bs, 1H), 6.93 (bs, 1H), 6.60 – 6.30 (m, 2H), 3.01 (s, 6H), 2.27 – 2.05 (m, 12H), 1.98 (d,  $J = 21.1$  Hz, 6H), 1.67 (d,  $J = 20.9$  Hz, 12H). <sup>13</sup>C NMR (125 MHz, CDCl<sub>3</sub>) δ 151.42, 142.81, 134.24 (d,  $J = 2.3$  Hz), 133.12 (d,  $J = 7.3$  Hz), 130.17, 129.14, 125.95 (d,  $J = 6.2$  Hz), 123.90, 123.55, 117.48, 113.95, 112.69, 42.31 (d,  $J = 45.5, 45$  Hz), 42.14 (dd,  $J = 45.5, 2.7$  Hz), 40.84, 36.28 (d,  $J = 8.2$  Hz), 28.58 (dd,  $J_1 = J_2 = 9.9$  Hz). <sup>31</sup>P NMR (162 MHz, CDCl<sub>3</sub>) δ 62.61. IR (neat): 2904, 2849, 2803, 1600, 1585, 1500, 1450, 1431, 1355, 1344, 1301, 1260, 1178, 1163, 1124, 1045, 990, 972, 842, 770, 733; HRMS ESI ( $m/z$ ): [MNa]<sup>+</sup> calcd. for C<sub>34</sub>H<sub>44</sub>AuClNPNa, 754.2463; found, 754.2451.

### 2'-(diadamantylphosphino)-N,N-dimethylbiphenyl-4-amine L2

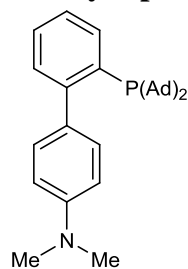

**L2**

Ligand **L2** was obtained in the same way to **L1**. <sup>1</sup>H NMR (500 MHz, CDCl<sub>3</sub>) δ 7.88 (d,  $J = 7.6$  Hz, 1H), 7.35 (t,  $J = 7.3$  Hz, 1H), 7.31 – 7.23 (m, 2H), 7.13 (d,  $J = 8.4$  Hz, 2H), 6.75 – 6.70 (m, 2H), 3.00 (s, 6H), 1.90 (q,  $J = 12.2$  Hz, 18H), 1.66 (s, 12H). <sup>13</sup>C NMR (125 MHz, CDCl<sub>3</sub>) δ 152.00 (d,  $J = 32.1$  Hz), 148.83, 136.62 (d,  $J = 2.9$  Hz), 133.19 (d,  $J = 26.3$  Hz), 132.23 (d,  $J = 7.1$  Hz), 131.29 (d,  $J = 3.9$  Hz), 131.06 (d,  $J =$

6.0 Hz), 128.08, 124.62, 111.21, 41.88 (d,  $J = 13.1$  Hz), 40.52, 37.28 (d,  $J = 25.9$  Hz), 36.97, 28.86 (d,  $J = 8.5$  Hz).  $^{31}\text{P}$  NMR (162 MHz,  $\text{CDCl}_3$ )  $\delta$  22.35 IR (neat): 3047, 2902, 2847, 1612, 1522, 1450, 1343, 1301, 1224, 1194, 1166, 1047, 970, 947, 814, 768, 743; HRMS ESI ( $m/z$ ):  $[\text{MH}]^+$  calcd. for  $\text{C}_{34}\text{H}_{45}\text{NP}$ , 498.3290; found, 498.3280.

### **L2AuCl**

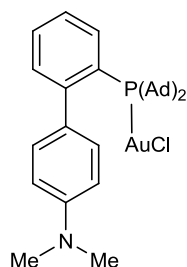

Au complex **L2AuCl** was obtained in quantitative yield according to general procedure A, step 4.  $^1\text{H}$  NMR (600 MHz,  $\text{CDCl}_3$ ) 7.83 (t,  $J = 7.5$  Hz, 1H), 7.46 (dt,  $J = 23.5, 7.6$  Hz, 2H), 7.36 – 7.29 (m, 1H), 6.97 (d,  $J = 8.1$  Hz, 2H), 6.87 (s, 2H), 3.05 (s, 6H), 2.24 – 2.05 (m, 12H), 1.98 (s, 6H), 1.67 (s, 12H).  $^{13}\text{C}$  NMR (150 MHz,  $\text{CDCl}_3$ )  $\delta$  151.06, 134.35, 133.85 (d,  $J = 7.7$  Hz), 130.27, 129.90, 129.66 (d,  $J = 7.8$  Hz), 125.94 (d,  $J = 6.5$  Hz), 124.12 (d,  $J = 45.1$  Hz), 113.37 (d,  $J = 61.3$  Hz), 42.45 (d,  $J = 23.5$  Hz), 42.09 (d,  $J = 2.5$  Hz), 36.25, 28.57 (d,  $J = 9.8$  Hz).  $^{31}\text{P}$  NMR (162 MHz,  $\text{CDCl}_3$ )  $\delta$  62.87. IR (neat): 2904, 2849, 2798, 1611, 1523, 1448, 1347, 1301, 1223, 1166, 1126, 1045, 972, 913, 815, 773, 744; HRMS ESI ( $m/z$ ):  $[\text{MNa}]^+$  calcd. for  $\text{C}_{34}\text{H}_{45}\text{AuClNPNa}$ , 752.2463; found, 752.2448.

### **(2'-(diadamantylphosphino)biphenyl-4-yl)(piperidin-1-yl)methanone L3**

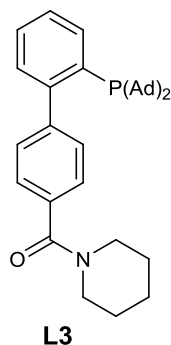

Ligand **L3** was obtained according to general procedure A.  $^1\text{H}$  NMR (500 MHz,  $\text{CDCl}_3$ )  $\delta$  7.89 (d,  $J = 7.5$  Hz, 1H), 7.40 – 7.31 (m, 4H), 7.26 (t,  $J = 3.9$  Hz, 3H), 7.22

(ddd,  $J = 7.3, 4.0, 1.7$  Hz, 1H), 3.72 (bs, 2H), 3.47 (bs, 2H), 1.85 (q,  $J = 12.7$  Hz, 18H), 1.67 (m, 18 H).  $^{13}\text{C}$  NMR (125 MHz,  $\text{CDCl}_3$ )  $\delta$  170.57, 150.98 (d,  $J = 32.7$  Hz), 145.27 (d,  $J = 6.9$  Hz), 136.62 (d,  $J = 2.6$  Hz), 133.78, 133.11 (d,  $J = 29.0$  Hz), 130.68 (d,  $J = 4.1$  Hz), 130.50 (d,  $J = 6.2$  Hz), 128.19, 125.94, 125.53, 48.84, 43.26, 41.80 (d,  $J = 13.0$  Hz), 37.34 (d,  $J = 26.2$  Hz), 36.89, 28.78 (d,  $J = 8.6$  Hz), 26.53, 25.72, 24.67.  $^{31}\text{P}$  NMR (162 MHz,  $\text{CDCl}_3$ )  $\delta$  20.64. IR (neat): 2911, 2861, 1627 (C=O), 1443, 1347, 1274, 1157, 1023, 751; HRMS ESI ( $m/z$ ):  $[\text{MNa}]^+$  calcd. for  $\text{C}_{38}\text{H}_{48}\text{NOPNa}$ , 588.3371; found, 588.3395.

### L3AuCl

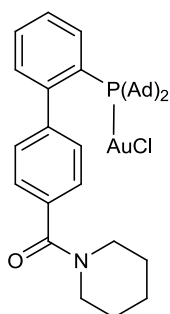

Au complex **L3AuCl** was obtained in quantitative yield according to general procedure A, step 4.  $^1\text{H}$  NMR (600 MHz,  $\text{CDCl}_3$ )  $\delta$  7.89 – 7.84 (m, 1H), 7.50 (d,  $J = 7.7$  Hz, 4H), 7.16 (t,  $J = 7.5$  Hz, 3H), 4.05 – 3.60 (m, 4H), 2.26 – 2.09 (m, 12H), 2.01 (s, 6H), 1.69 (s, 18H).  $^{13}\text{C}$  NMR (125 MHz,  $\text{CDCl}_3$ )  $\delta$  169.85, 150.07 (d,  $J = 13.0$  Hz), 143.89 (d,  $J = 6.3$  Hz), 136.25, 134.36 (d,  $J = 2.3$  Hz), 133.94 (d,  $J = 7.5$  Hz), 130.48 (d,  $J = 2.3$  Hz), 129.68, 127.68, 126.44 (d,  $J = 6.4$  Hz), 123.03 (d,  $J = 43.5$  Hz), 49.77, 43.41, 42.66 (d,  $J = 23.9$  Hz), 42.13 (d,  $J = 2.5$  Hz), 36.23, 28.57 (d,  $J = 9.8$  Hz), 36.97, 25.78, 24.74.  $^{31}\text{P}$  NMR (162 MHz,  $\text{CDCl}_3$ )  $\delta$  62.19. IR (neat): 2911, 2851, 1627 (C=O), 1443, 1347, 1274, 1157, 1023, 751; HRMS ESI ( $m/z$ ):  $[\text{MNa}]^+$  calcd. for  $^{38}\text{H}_{48}\text{AuClINNaOP}$ , 820.2725; found, 820.2709.

### (2'-(diadamantylphosphino)biphenyl-3-yl)(morpholino)methanone **L4**

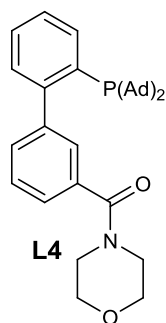

Ligand **L4** was obtained according to general procedure A.  $^1\text{H}$  NMR (500 MHz,  $\text{CDCl}_3$ )  $\delta$  7.88 (dd,  $J = 5.2, 3.7$  Hz, 1H), 7.45 – 7.33 (m, 4H), 7.31 – 7.27 (m, 1H), 7.25 – 7.19 (m, 2H), 3.86 – 3.39 (m, 8H), 1.84 (dd,  $J = 29.2, 9.6$  Hz, 18H), 1.64 (q,  $J = 12.6$  Hz, 12H).  $^{13}\text{C}$  NMR (125 MHz,  $\text{CDCl}_3$ )  $\delta$  170.64, 150.66 (d,  $J = 32.2$  Hz), 143.89 (d,  $J = 7.1$  Hz), 136.54 (d,  $J = 2.7$  Hz), 134.04, 132.87 (d,  $J = 27.6$  Hz), 132.44 (d,  $J = 4.1$  Hz), 130.54 (d,  $J = 6.1$  Hz), 128.71 (d,  $J = 3.8$  Hz), 128.44 (d,  $J = 1.1$  Hz), 127.62, 125.81, 125.33, 67.02, 48.51, 42.48, 41.92 (d,  $J = 12.8$  Hz), 37.43 (d,  $J = 25.2$  Hz), 36.89, 28.76 (d,  $J = 8.6$  Hz).  $^{31}\text{P}$  NMR (162 MHz,  $\text{CDCl}_3$ )  $\delta$  21.17. IR (neat): 2902, 2848, 1639 (C=O), 1450, 1301, 1273, 1166, 1115, 1018, 807, 743; HRMS ESI ( $m/z$ ):  $[\text{MNa}]^+$  calcd. for  $\text{C}_{37}\text{H}_{46}\text{NO}_2\text{PNa}$ , 590.3164; found, 590.3174.

### **L4AuCl**

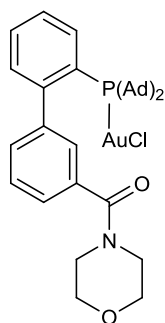

Au complex **L4AuCl** was obtained in quantitative yield according to general procedure A, step 4.  $^1\text{H}$  NMR (600 MHz,  $\text{CDCl}_3$ )  $\delta$  7.88 – 7.84 (m, 1H), 7.57 (d,  $J = 7.8$  Hz, 1H), 7.54 – 7.46 (m, 3H), 7.30 – 7.26 (m, 1H), 7.18 – 7.10 (m, 2H), 4.03 – 3.48 (m, 8H), 2.27 – 2.13 (m, 6H), 2.04 (dd,  $J = 44.5, 13.8$  Hz, 12H), 1.75 – 1.59 (m, 12H).  $^{13}\text{C}$  NMR (150 MHz,  $\text{CDCl}_3$ )  $\delta$  170.11, 149.56 (d,  $J = 12.9$  Hz), 142.81 (d,  $J = 6.4$  Hz), 135.49, 134.32, 133.53 (d,  $J = 7.3$  Hz), 130.82, 130.57 (d,  $J = 2.1$  Hz),

129.11, 127.69, 127.07, 126.66 (d,  $J = 6.6$  Hz), 123.48 (d,  $J = 43.8$  Hz), 67.55, 66.88, 48.80, 48.67, 42.65 (dd,  $J = 30.6, 23.7$  Hz), 42.19 (d,  $J = 45.5$  Hz), 36.23 (d,  $J = 8.0$  Hz), 28.52 (dd,  $J = 16.5, 9.8$  Hz).  $^{31}\text{P}$  NMR (162 MHz,  $\text{CDCl}_3$ )  $\delta$  62.31. IR (neat): 2908, 2851, 1738, 1634 (C=O), 1460, 1347, 1302, 1264, 1157, 1114, 1045, 799, 748; HRMS ESI ( $m/z$ ):  $[\text{MNa}]^+$  calcd. for  $\text{C}_{37}\text{H}_{46}\text{AuClINNaO}_2\text{P}$ , 822.2518; found, 822.2507.

### 2'-(diadamantylphosphino)-N,N-diethylbiphenyl-3-carboxamide **L5**

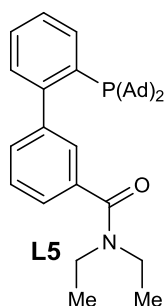

Ligand **L5** was obtained according to general procedure A.  $^1\text{H}$  NMR (500 MHz,  $\text{CDCl}_3$ )  $\delta$  7.88 (d,  $J = 7.5$  Hz, 1H), 7.41 – 7.33 (m, 3H), 7.33 – 7.25 (m, 3H), 7.22 (s, 1H), 3.49 (m, 4H), 1.96 – 1.78 (m, 18H), 1.70 – 1.52 (m, 12H), 1.36 – 0.98 (m, 6H).  $^{13}\text{C}$  NMR (125 MHz,  $\text{CDCl}_3$ )  $\delta$  171.46, 150.89 (d,  $J = 32.1$  Hz), 143.63 (d,  $J = 7.0$  Hz), 136.54 (d,  $J = 2.6$  Hz), 135.91, 132.90 (d,  $J = 28.0$  Hz), 131.67 (d,  $J = 4.4$  Hz), 130.56 (d,  $J = 6.1$  Hz), 128.50 (d,  $J = 3.9$  Hz), 128.40 (d,  $J = 1.0$  Hz), 127.23, 125.63, 124.31, 43.36, 41.88 (d,  $J = 12.9$  Hz), 39.12, 37.39 (d,  $J = 25.7$  Hz), 36.89, 28.76 (d,  $J = 8.6$  Hz), 14.28, 12.97.  $^{31}\text{P}$  NMR (162 MHz,  $\text{CDCl}_3$ )  $\delta$  21.01. IR (neat): 2902, 2847, 1635 (C=O), 1449, 1345, 1303, 1218, 1100, 970, 767, 731; HRMS ESI ( $m/z$ ):  $[\text{MNa}]^+$  calcd. for  $\text{C}_{37}\text{H}_{48}\text{NOPNa}$ , 576.3371; found, 576.3395.

### **L5AuCl**

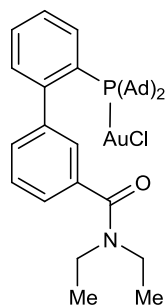

Au complex **L5AuCl** was obtained in quantitative yield according to general procedure A, step 4.  $^1\text{H}$  NMR (500 MHz,  $\text{CDCl}_3$ )  $\delta$  7.90 – 7.79 (m, 1H), 7.54 – 7.44 (m, 4H), 7.32 (dd,  $J = 9.1, 4.3$  Hz, 1H), 7.16 (d,  $J = 7.4$  Hz, 1H), 7.11 (s, 1H), 3.84 – 3.29 (m, 4H), 2.34 – 2.16 (m, 6H), 2.16 – 1.93 (m, 12H), 1.78 – 1.52 (m, 12H), 1.18 (dt,  $J = 45.6, 7.0$  Hz, 6H).  $^{13}\text{C}$  NMR (125 MHz,  $\text{CDCl}_3$ )  $\delta$  171.17, 149.86 (d,  $J = 12.6$  Hz), 142.68 (d,  $J = 6.3$  Hz), 137.60, 134.29 (d,  $J = 2.3$  Hz), 133.71 (d,  $J = 7.4$  Hz), 130.53 (d,  $J = 2.3$  Hz), 130.23, 129.01, 127.00, 126.51 (d,  $J = 6.6$  Hz), 126.00, 123.46 (d,  $J = 43.8$  Hz), 43.62, 42.61 (dd,  $J = 46.3, 23.6$  Hz), 42.18 (dd,  $J = 60.1, 2.6$  Hz) 39.13, 36.24, 28.54 (dd,  $J = 17.8, 9.8$  Hz) 14.54, 12.86.  $^{31}\text{P}$  NMR (162 MHz,  $\text{CDCl}_3$ )  $\delta$  62.36. IR (neat): 2908, 2851, 1629 (C=O), 1451, 1346, 1302, 1159, 1071, 1046, 771, 747; HRMS ESI ( $m/z$ ):  $[\text{MNa}]^+$  calcd. for  $\text{C}_{37}\text{H}_{48}\text{AuClINNaOP}$ , 808.2725; found, 808.2700.

### 2'-(diadamantylphosphino)-N,N-diisopropylbiphenyl-3-carboxamide **L6**

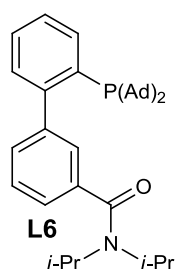

Ligand **L6** was obtained according to general procedure A.  $^1\text{H}$  NMR (500 MHz,  $\text{CDCl}_3$ )  $\delta$  7.89 (d,  $J = 7.5$  Hz, 1H), 7.41 – 7.31 (m, 3H), 7.31 – 7.26 (m, 2H), 7.22 (dt,  $J = 7.4, 1.4$  Hz, 1H), 7.17 (t,  $J = 1.5$  Hz, 1H), 4.2 – 3.2 (m, 2H), 1.94 – 1.78 (m, 18H), 1.70 – 1.59 (m, 12H), 1.59 – 0.9 (m, 12H).  $^{13}\text{C}$  NMR (125 MHz,  $\text{CDCl}_3$ )  $\delta$  171.24, 151.01 (d,  $J = 32.1$  Hz), 143.90 (d,  $J = 6.9$  Hz), 137.85, 136.58 (d,  $J = 2.7$  Hz), 132.76 (d,  $J = 27.9$  Hz), 131.57 (d,  $J = 5.3$  Hz), 130.78 (d,  $J = 6.2$  Hz), 128.38 (d,  $J =$



1.1 Hz), 127.43 (d,  $J = 2.6$  Hz), 126.95, 125.54, 123.40, 50.72, 45.91, 41.89 (d,  $J = 12.9$  Hz), 37.41 (d,  $J = 25.6$  Hz), 36.90, 28.80 (d,  $J = 8.6$  Hz), 20.79.  $^{31}\text{P}$  NMR (162 MHz,  $\text{CDCl}_3$ )  $\delta$  21.17. IR (neat): 2905, 2849, 1738, 1634 (C=O), 1445, 1373, 1340, 1212, 1158, 1041, 768; HRMS ESI ( $m/z$ ):  $[\text{MNa}]^+$  calcd. for  $\text{C}_{39}\text{H}_{52}\text{NOPNa}$ , 604.3684; found, 604.3694.

### **L6AuCl**

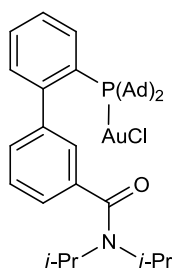

Au complex **L6AuCl** was obtained in quantitative yield according to general procedure A, step 4.  $^1\text{H}$  NMR (600 MHz,  $\text{CDCl}_3$ )  $\delta$  7.84 (t,  $J = 7.9$  Hz, 1H), 7.50 (q,  $J = 6.0, 4.2$  Hz, 2H), 7.47 – 7.41 (m, 2H), 7.31 (t,  $J = 5.1$  Hz, 1H), 7.12 (d,  $J = 7.0$  Hz, 1H), 7.02 (s, 1H), 4.53 (bs, 1H), 3.49 (bs, 1H), 2.29 – 2.18 (m, 6H), 2.14 – 2.00 (m, 12H), 1.96 (s, 3H), 1.77 – 1.45 (m, 15H), 1.30 – 1.19 (m, 3H), 1.08 – 0.96 (m, 3H).  $^{13}\text{C}$  NMR (150 MHz,  $\text{CDCl}_3$ )  $\delta$  170.95, 149.94 (d,  $J = 13.1$  Hz), 142.76 (d,  $J = 6.5$  Hz), 139.05, 134.25, 133.68 (d,  $J = 7.3$  Hz), 130.45, 129.59, 129.10, 126.46 (d,  $J = 6.5$  Hz), 126.31, 124.97, 123.46 (d,  $J = 43.9$  Hz), 51.38, 45.92, 42.53 (d,  $J = 93.5$  Hz, 23.6 Hz), 42.17 (d,  $J = 82.5$  Hz), 36.24, 28.54 (dd,  $J = 27.1, 9.8$  Hz), 21.07, 20.67, 20.53.  $^{31}\text{P}$  NMR (162 MHz,  $\text{CDCl}_3$ )  $\delta$  62.37. IR (neat): 2917, 2850, 1736, 1628 (C=O), 1577, 1540, 1448, 1373, 1343, 1301, 1211, 1105, 1019, 973, 772, 747, 710; HRMS ESI ( $m/z$ ):  $[\text{MNa}]^+$  calcd. for  $\text{C}_{39}\text{H}_{52}\text{AuClINNaOP}$ , 836.3038; found, 836.3021.

### **(2'-(diadamantylphosphino)biphenyl-3-yl)(piperidin-1-yl)methanone L7**

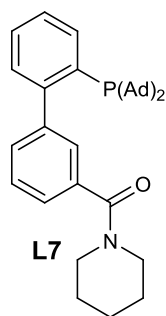

Ligand **L7** was obtained according to general procedure A.  $^1\text{H}$  NMR (500 MHz,  $\text{CDCl}_3$ )  $\delta$  7.91 – 7.84 (m, 1H), 7.41 – 7.31 (m, 4H), 7.29 (ddd,  $J = 7.3, 2.6, 1.6$  Hz, 1H), 7.26 – 7.23 (m, 1H), 7.20 (d,  $J = 1.6$  Hz, 1H), 3.71 (s, 2H), 3.47 (s, 2H), 1.85 (q,  $J = 11.9$  Hz, 18H), 1.69 – 1.39 (m, 18H).  $^{13}\text{C}$  NMR (125 MHz,  $\text{CDCl}_3$ )  $\delta$  170.52, 150.92 (d,  $J = 32.3$  Hz), 143.70 (d,  $J = 7.1$  Hz), 136.53 (d,  $J = 2.6$  Hz), 135.31, 132.92 (d,  $J = 27.9$  Hz), 132.10 (d,  $J = 4.7$  Hz), 130.58 (d,  $J = 6.1$  Hz), 128.41 (d,  $J = 3.1$  Hz), 128.37 (d,  $J = 1.1$  Hz), 127.29, 125.65, 125.02, 48.95, 43.12, 41.89 (d,  $J = 12.9$  Hz), 37.41 (d,  $J = 25.5$  Hz), 36.91, 28.79 (d,  $J = 8.6$  Hz), 26.68, 25.62, 24.63.  $^{31}\text{P}$  NMR (162 MHz,  $\text{CDCl}_3$ )  $\delta$  21.12. IR (neat): 2901, 2847, 1630 (C=O), 1443, 1343, 1300, 1265, 1228, 1110, 1026, 1002, 970, 907, 826, 809, 765, 731; HRMS ESI ( $m/z$ ):  $[\text{MNa}]^+$  calcd. for  $\text{C}_{38}\text{H}_{48}\text{NOPNa}$ , 588.3371; found, 588.3361.

### **L7AuCl**

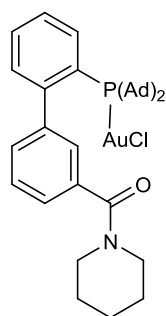

Au complex **L7AuCl** was obtained in quantitative yield according to general procedure A, step 4.  $^1\text{H}$  NMR (600 MHz,  $\text{CDCl}_3$ )  $\delta$  7.88 – 7.82 (m, 1H), 7.55 (d,  $J = 7.8$  Hz, 1H), 7.52 – 7.45 (m, 3H), 7.31 – 7.27 (m, 1H), 7.14 (d,  $J = 7.6$  Hz, 1H), 7.11 (s, 1H), 3.86 – 3.53 (m, 4H), 2.28 – 1.91 (m, 18H), 1.84 – 1.42 (m, 18H).  $^{13}\text{C}$  NMR (125 MHz,  $\text{CDCl}_3$ )  $\delta$  170.05, 149.81 (d,  $J = 12.9$  Hz), 142.54 (d,  $J = 6.6$  Hz), 136.66, 134.29, 134.27, 133.57 (d,  $J = 7.3$  Hz), 130.50 (d,  $J = 2.2$  Hz), 130.35, 129.05, 127.38,

126.70, 126.53 (d,  $J = 6.6$  Hz), 123.49 (d,  $J = 43.9$  Hz), 49.33, 43.16, 42.61 ( $J = 37.5$  Hz, 23.8 Hz), 42.16 (dd,  $J = 55.0, 2.6$  Hz) 36.25, 36.23, 36.22, 28.54 (dd,  $J = 15.1, 9.8$  Hz), 26.78, 25.75, 24.66.  $^{31}\text{P}$  NMR (162 MHz,  $\text{CDCl}_3$ )  $\delta$  62.26. IR (neat): 2906, 2851, 2231, 1625 (C=O), 1444, 1344, 1301, 1253, 1228, 1109, 1042, 1002, 972, 915, 852, 804, 772, 729; HRMS ESI ( $m/z$ ):  $[\text{MNa}]^+$  calcd.  $\text{C}_{38}\text{H}_{48}\text{AuCINNaOP}$ , 820.2725; found, 820.2717.

## (2'-(diadamantylphosphino)biphenyl-3-yl)(pyrrolidin-1-yl)methanone **L8**

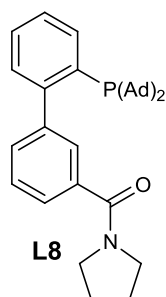

Ligand **L8** was obtained according to general procedure A.  $^1\text{H}$  NMR (500 MHz,  $\text{CDCl}_3$ )  $\delta$  7.91 – 7.85 (m, 1H), 7.48 (dt,  $J = 7.6, 1.4$  Hz, 1H), 7.42 – 7.31 (m, 4H), 7.29 (d,  $J = 7.6$  Hz, 1H), 7.25 – 7.21 (m, 1H), 3.65 (t,  $J = 7.0$  Hz, 2H), 3.53 (t,  $J = 6.6$  Hz, 2H), 2.00 – 1.78 (m, 22H), 1.72 – 1.55 (m, 12H).  $^{13}\text{C}$  NMR (125 MHz,  $\text{CDCl}_3$ )  $\delta$  169.91, 150.94 (d,  $J = 32.3$  Hz), 143.51 (d,  $J = 7.0$  Hz), 136.52 (d,  $J = 2.7$  Hz), 136.01, 132.93 (d,  $J = 27.7$  Hz), 132.33 (d,  $J = 4.3$  Hz), 130.60 (d,  $J = 6.1$  Hz), 128.90 (d,  $J = 3.6$  Hz), 128.35 (d,  $J = 1.1$  Hz), 127.25, 125.65, 125.31, 49.90, 46.04, 41.89 (d,  $J = 12.9$  Hz), 37.35 (d,  $J = 25.5$  Hz), 36.90, 28.78 (d,  $J = 8.6$  Hz), 26.40, 24.54.  $^{31}\text{P}$  NMR (162 MHz,  $\text{CDCl}_3$ )  $\delta$  22.10. IR (neat): 2901, 2847, 1628 (C=O), 1424, 1342, 1301, 1253, 1162, 1047, 971, 921, 808, 767, 730; HRMS ESI ( $m/z$ ):  $[\text{MNa}]^+$  calcd. for  $\text{C}_{37}\text{H}_{46}\text{NOPNa}$ , 574.3215; found, 574.3214.

## **L8AuCl**

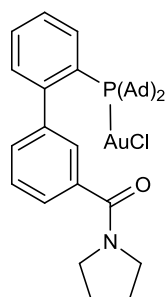

Au complex **L8AuCl** was obtained in quantitative yield according to general procedure A, step 4.  $^1\text{H}$  NMR (500 MHz,  $\text{CDCl}_3$ )  $\delta$  7.85 (t,  $J = 8.1$  Hz, 1H), 7.69 (d,  $J = 7.8$  Hz, 1H), 7.54 – 7.42 (m, 3H), 7.29 (d,  $J = 18.1$  Hz, 2H), 7.16 (d,  $J = 7.6$  Hz, 1H), 3.93 – 3.53 (m, 4H), 2.30 – 1.79 (m, 22H), 1.73 – 1.59 (m, 12H).  $^{13}\text{C}$  NMR (125 MHz,  $\text{CDCl}_3$ )  $\delta$  169.23, 149.83 (d,  $J = 13.0$  Hz), 142.46 (d,  $J = 6.4$  Hz), 136.92, 134.28 (d,  $J = 2.4$  Hz), 133.66 (d,  $J = 7.4$  Hz), 130.94, 130.51 (d,  $J = 2.4$  Hz), 128.61, 128.14,

127.22, 126.54 (d,  $J = 6.5$  Hz), 123.52 (d,  $J = 43.7$  Hz), 50.16, 46.42, 42.58 (dd,  $J = 23.7, 11.7$  Hz), 42.16 (dd,  $J = 28.6, 2.6$  Hz), 36.23, 28.54 (dd,  $J = 9.9, 7.1$  Hz), 26.57, 24.43.  $^{31}\text{P}$  NMR (162 MHz,  $\text{CDCl}_3$ )  $\delta$  62.32. IR (neat): 2906, 2851, 2232, 1620 (C=O), 1598, 1575, 1442, 1344, 1301, 1259, 1198, 1104, 1045, 972, 914, 806, 772, 730; HRMS ESI ( $m/z$ ):  $[\text{MNa}]^+$  calcd. for  $\text{C}_{37}\text{H}_{46}\text{AuClINaOP}$ , 806.2569; found, 806.2565.

### **L8AuNTf<sub>2</sub>**

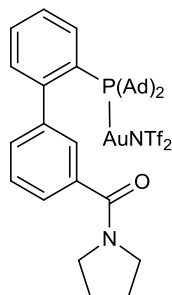

To a suspension of 0.95 mmol Au complex **L8AuCl** in vial with 5 mL anhydrous DCM was added  $\text{AgNTf}_2$  (0.95 mmol). The mixture was stirred for 30 min at room temperature and the vial was left in a centrifuge for 5 min after which  $\text{AgCl}$  all stayed in the bottom. After passing through a Teflon syringe filter (0.2  $\mu\text{m}$ ), the solvent was evaporated off under reduced pressure to give the desired gold complex **L8AuNTf<sub>2</sub>** in 95% yield.  $^1\text{H}$  NMR (600 MHz,  $\text{CDCl}_3$ )  $\delta$  7.91 – 7.85 (m, 1H), 7.68 (d,  $J = 7.7$  Hz, 1H), 7.62 – 7.53 (m, 3H), 7.35 (bs, 1H), 7.30 (d,  $J = 7.3$  Hz, 1H), 7.24 (bs, 1H), 3.72 – 3.40 (m, 4H), 2.24 – 1.82 (m, 22H), 1.76 – 1.53 (m, 12H).  $^{13}\text{C}$  NMR (150 MHz,  $\text{CDCl}_3$ )  $\delta$  169.75, 148.81 (d,  $J = 10.6$  Hz), 142.12, 136.21, 134.06, 133.59 (d,  $J = 7.4$  Hz), 131.69, 131.29, 128.88, 127.66 (d,  $J = 87.8$  Hz), 127.11 (d,  $J = 7.4$  Hz), 121.30 (d,  $J = 44.7$  Hz), 119.62 (dd,  $J = 324$  Hz), 50.24, 46.92, 43.08 (d,  $J = 24.6$  Hz), 42.14 (d,  $J = 38.5$  Hz), 36.03, 28.48 (dd,  $J = 12.3, 10.2$  Hz), 26.20, 24.24.  $^{31}\text{P}$  NMR (162 MHz,  $\text{CDCl}_3$ )  $\delta$  61.10. IR (neat): 2908, 2853, 1622 (C=O), 1596, 1575, 1451, 1354, 1229, 1196, 1138, 1061; HRMS ESI<sup>+</sup> ( $m/z$ ):  $[\text{M-NTf}_2]^+$  calcd. for  $\text{C}_{37}\text{H}_{46}\text{NOAuP}$ , 748.2983; found, 748.2975; ESI<sup>-</sup> ( $m/z$ ):  $[\text{M-L8Au}]^-$  calcd. For  $\text{C}_2\text{NO}_4\text{S}_2\text{F}_6$ , 279.9173; found, 279.9159.

## General procedure B: Preparation of Enol Esters **1** (50 ppm)

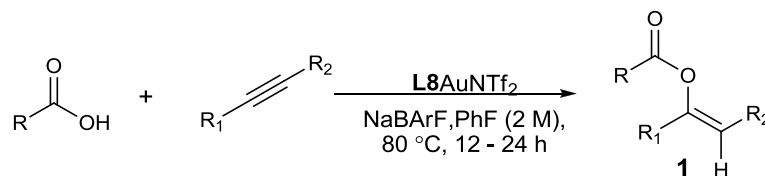

In a sealed 1 dr reaction vial equipped with a magnetic stirring bar, 3 mmol carboxylic acids (1 equiv), 4.4 mmol 1-hexyne (1.45 equiv) or 3.6 mmol other alkynes (1.2 equiv) and 3.1 mg NaBArF<sub>4</sub> (1200 ppm) were added to 0.6 mL fluorobenzene. L8AuNTf<sub>2</sub> (50 μL of a 3.09 mg/mL solution in PhF, 0.150 μmol, 50 ppm) was added to the above vial and then the reaction mixture was heated at 80 °C for 12 - 24 h. Once the reaction finished by TLC, it was concentrated and left on the high vacuum pump for overnight to give the NMR pure product. If crude NMR was not pure, the residue was further purified through silica gel flash chromatography to give the desired product **1**.

### dodec-1-en-2-yl benzoate **1a**

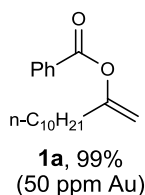

857 mg Compound **1a** was obtained in 99% yield according to general procedure B after chromatography (eluent: ethyl acetate: hexanes = 1: 30). <sup>1</sup>H NMR (500 MHz, CDCl<sub>3</sub>) δ 8.14 – 8.05 (m, 2H), 7.63 – 7.55 (m, 1H), 7.51 – 7.42 (m, 2H), 4.84 (dt, *J* = 12.5, 2.0 Hz, 2H), 2.34 (t, *J* = 7.6 Hz, 2H), 1.58 – 1.48 (m, 2H), 1.40 – 1.19 (m, 14H), 0.88 (t, *J* = 7.0 Hz, 1H). <sup>13</sup>C NMR (125 MHz, CDCl<sub>3</sub>) δ 164.74, 156.83, 133.23, 129.92, 129.90, 128.42, 101.27, 33.43, 31.88, 29.56, 29.52, 29.35, 29.30, 28.99, 26.54, 22.66, 14.09. IR (neat): 3118, 2954, 2925, 2854, 1733 (C=O), 1666, 1602, 1454, 1378, 1314, 1270, 1222, 1172, 1068, 863, 705; HRMS ESI (*m/z*): [MNa]<sup>+</sup> calcd. for C<sub>19</sub>H<sub>29</sub>O<sub>2</sub>Na, 311.1987; found, 311.1981.

### hex-1-en-2-yl 3,5-dimethylbenzoate **1b**

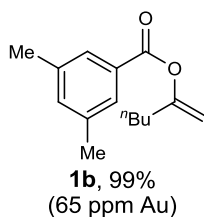

693 mg Compound **1b** was obtained in 99% yield according to general procedure B without chromatography.  $^1\text{H}$  NMR (500 MHz,  $\text{CDCl}_3$ )  $\delta$  7.70 (s, 2H), 7.23 (s, 1H), 4.83 (d,  $J = 0.5$  Hz, 2H), 2.38 (d,  $J = 0.5$  Hz, 6H), 2.35 (t,  $J = 7.5$  Hz, 2H), 1.59 – 1.48 (m, 2H), 1.45 – 1.34 (m, 2H), 0.92 (t,  $J = 7.3$  Hz, 3H).  $^{13}\text{C}$  NMR (125 MHz,  $\text{CDCl}_3$ )  $\delta$  165.07, 156.88, 138.09, 134.88, 129.73, 127.58, 101.16, 33.10, 28.64, 22.11, 21.11, 13.81. IR (neat): 3116, 2958, 2931, 2873, 2864, 1732 (C=O), 1667, 1610, 1466, 1382, 1204, 867, 761; HRMS ESI ( $m/z$ ):  $[\text{MNa}]^+$  calcd. for  $\text{C}_{15}\text{H}_{20}\text{O}_2\text{Na}$ , 255.1361; found, 255.1342.

### hex-1-en-2-yl 2-methylbenzoate **1c**

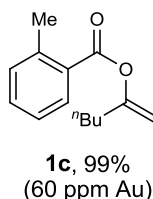

652 mg Compound **1c** was obtained in 99% yield according to general procedure B without chromatography.  $^1\text{H}$  NMR (600 MHz,  $\text{CDCl}_3$ )  $\delta$  8.05 – 7.92 (m, 1H), 7.43 (td,  $J = 7.5, 1.3$  Hz, 1H), 7.34 – 7.16 (m, 2H), 4.84 (dd,  $J = 6.1, 1.2$  Hz, 2H), 2.64 (s, 3H), 2.35 (t,  $J = 7.5$  Hz, 2H), 1.63 – 1.47 (m, 2H), 1.46 – 1.34 (m, 2H), 0.93 (t,  $J = 7.3$  Hz, 3H).  $^{13}\text{C}$  NMR (150 MHz,  $\text{CDCl}_3$ )  $\delta$  165.49, 156.79, 140.81, 132.31, 131.79, 130.86, 129.01, 125.75, 101.23, 33.15, 28.66, 22.10, 21.79, 13.82. IR (neat): 3072, 2957, 2932, 2873, 2864, 1735 (C=O), 1666, 1603, 1458, 1383, 1294, 865, 737; HRMS ESI ( $m/z$ ):  $[\text{MNa}]^+$  calcd. for  $\text{C}_{14}\text{H}_{18}\text{O}_2\text{Na}$ , 241.1204; found, 241.1199.

### hex-1-en-2-yl 3-methoxybenzoate **1d**

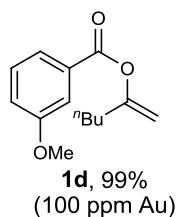

698 mg Compound **1d** was obtained in 99% yield according to general procedure B without chromatography.  $^1\text{H}$  NMR (600 MHz,  $\text{CDCl}_3$ )  $\delta$  7.71 – 7.64 (m, 1H), 7.59 (dd,  $J = 2.5, 1.5$  Hz, 1H), 7.36 (dd,  $J = 10.3, 5.6$  Hz, 1H), 7.12 (ddd,  $J = 8.2, 2.7, 0.8$  Hz, 1H), 4.84 (dd,  $J = 15.3, 1.4$  Hz, 2H), 3.85 (s, 3H), 2.34 (t,  $J = 7.8$  Hz, 2H), 1.57 – 1.46 (m, 2H), 1.45 – 1.31 (m, 2H), 0.92 (t,  $J = 7.3$  Hz, 3H).  $^{13}\text{C}$  NMR (150 MHz,  $\text{CDCl}_3$ )  $\delta$  164.55, 159.55, 156.75, 131.14, 129.40, 122.24, 119.71, 114.25, 101.22, 55.36, 33.06, 28.61, 22.05, 13.78. IR (neat): 3078, 2957, 2932, 2873, 2864, 1735 (C=O), 1666, 1586, 1488, 1466, 1432, 1278, 1213, 869, 750; HRMS ESI ( $m/z$ ):  $[\text{MNa}]^+$  calcd. for  $\text{C}_{14}\text{H}_{18}\text{O}_3\text{Na}$ , 257.1154; found, 257.1151.

### hex-1-en-2-yl 3-bromobenzoate **1e**

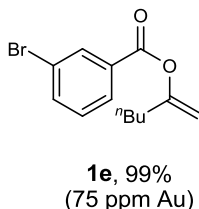

845 mg Compound **1e** was obtained in 99% yield according to general procedure B without chromatography.  $^1\text{H}$  NMR (500 MHz,  $\text{CDCl}_3$ )  $\delta$  8.21 (t,  $J = 1.8$  Hz, 1H), 8.05 – 7.94 (m, 1H), 7.70 (ddd,  $J = 8.0, 2.0, 1.1$  Hz, 1H), 7.34 (dd,  $J = 9.9, 5.9$  Hz, 1H), 4.84 (dt,  $J = 3.7, 1.5$  Hz, 2H), 2.33 (t,  $J = 7.5$ , 2H), 1.51 (tdd,  $J = 8.4, 7.3, 5.1$  Hz, 2H), 1.38 (dq,  $J = 14.4, 7.3$  Hz, 2H), 0.92 (t,  $J = 7.3$  Hz, 3H).  $^{13}\text{C}$  NMR (125 MHz,  $\text{CDCl}_3$ )  $\delta$  163.36, 156.61, 136.15, 132.82, 131.81, 129.98, 128.43, 122.49, 101.47, 33.00, 28.59, 22.06, 13.78. IR (neat): 3070, 2959, 2932, 2873, 2864, 1737 (C=O), 1668, 1571, 1468, 1423, 1291, 1251, 1233, 1173, 1116, 1067, 869, 806, 742; HRMS ESI ( $m/z$ ):  $[\text{MNa}]^+$  calcd. for  $\text{C}_{13}\text{H}_{15}\text{BrO}_2\text{Na}$ , 305.0153; found, 305.0144.



### hex-1-en-2-yl 2-chloro-4-nitrobenzoate **1f**

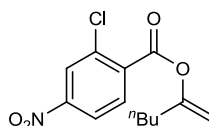

**1f**, 99%  
(75 ppm Au)

847 mg Compound **1f** was obtained in 99% yield according to general procedure B without chromatography.  $^1\text{H}$  NMR (500 MHz,  $\text{CDCl}_3$ )  $\delta$  8.31 (d,  $J = 2.2$  Hz, 1H), 8.17 (dd,  $J = 8.6, 2.2$  Hz, 1H), 8.08 – 7.93 (m, 1H), 5.16 – 4.67 (m, 2H), 2.34 (t,  $J = 7.6$  Hz, 2H), 1.57 – 1.47 (m, 2H), 1.38 (dq,  $J = 14.4, 7.3$  Hz, 3H), 0.91 (t,  $J = 7.3$  Hz, 3H).  $^{13}\text{C}$  NMR (125 MHz,  $\text{CDCl}_3$ )  $\delta$  162.18, 156.36, 149.49, 135.48, 134.90, 132.12, 126.00, 121.45, 101.90, 32.80, 32.80, 28.47, 28.47, 21.97, 21.97, 13.73, 13.73. IR (neat): 3041, 2959, 2931, 2873, 2864, 1745 (C=O), 1668, 1590, 1528, 1467, 1388, 1348, 1280, 1220, 1127, 1042, 860, 764, 732; HRMS ESI ( $m/z$ ):  $[\text{MNa}]^+$  calcd. for  $\text{C}_{13}\text{H}_{14}\text{ClNO}_4\text{Na}$ , 306.0509; found, 306.0508.

### hex-1-en-2-yl 2,6-dichlorobenzoate **1g**

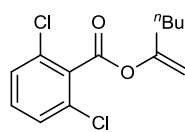

**1g**, 99%  
(50 ppm Au)

816 mg Compound **1g** was obtained in 99% yield according to general procedure B without chromatography.  $^1\text{H}$  NMR (500 MHz,  $\text{CDCl}_3$ )  $\delta$  7.36 – 7.25 (m, 3H), 4.97 (d,  $J = 1.9$  Hz, 1H), 4.88 (q,  $J = 1.3$  Hz, 1H), 2.41 – 2.34 (m, 2H), 1.62 – 1.52 (m, 2H), 1.45 – 1.35 (m, 2H), 0.93 (t,  $J = 7.3$  Hz, 3H).  $^{13}\text{C}$  NMR (125 MHz,  $\text{CDCl}_3$ ) 162.82, 156.55, 133.28, 131.80, 130.98, 127.85, 101.94, 32.86, 28.42, 22.02, 13.79. IR (neat): 3087, 2959, 2933, 2874, 1756 (C=O), 1670, 1586, 1565, 1434, 1381, 1272, 1225, 1196, 1166, 1139, 1082, 1053, 931, 881, 802, 780, 746; HRMS ESI ( $m/z$ ):  $[\text{MNa}]^+$  calcd. for  $\text{C}_{13}\text{H}_{14}\text{Cl}_2\text{O}_2\text{Na}$ , 295.0269; found, 295.0256.

### hex-1-en-2-yl 3-(4,4,5,5-tetramethyl-1,3,2-dioxaborolan-2-yl)benzoate **1h**

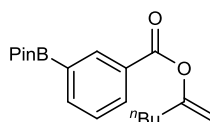

**1h**, 99%  
(150 ppm Au)

987 mg Compound **1h** was obtained in 99% yield according to general procedure B without chromatography.  $^1\text{H}$  NMR (500 MHz,  $\text{CDCl}_3$ )  $\delta$  8.52 (d,  $J = 18.9$  Hz, 1H), 8.16 (dt,  $J = 7.8, 1.5$  Hz, 1H), 8.01 (d,  $J = 7.4$  Hz, 1H), 7.46 (dd,  $J = 9.3, 5.9$  Hz, 1H), 4.93 – 4.71 (m, 2H), 2.35 (dd,  $J = 23.6, 16.1$  Hz, 2H), 1.57 – 1.44 (m, 2H), 1.43 – 1.26 (m, 16H), 0.91 (t,  $J = 7.3$  Hz, 3H).  $^{13}\text{C}$  NMR (125 MHz,  $\text{CDCl}_3$ )  $\delta$  164.76, 156.84, 139.45, 136.05, 132.53, 129.26, 127.80, 101.17, 84.04, 43.36, 33.04, 28.58, 24.79, 22.07, 13.77. IR (neat): 3065, 2979, 2960, 2933, 2874, 1735 (C=O), 1667, 1606, 1422, 1362, 1327, 1248, 1222, 1144, 965, 857, 753; HRMS ESI ( $m/z$ ):  $[\text{MNa}]^+$  calcd. for  $\text{C}_{18}\text{H}_{27}\text{BO}_4\text{Na}$ , 353.1900; found, 353.1887.

### hex-1-en-2-yl thiophene-2-carboxylate **1i**

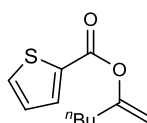

**1i**, 99%  
(50 ppm Au)

627 mg Compound **1i** was obtained in 99% yield according to general procedure B without chromatography.  $^1\text{H}$  NMR (500 MHz,  $\text{CDCl}_3$ )  $\delta$  7.94 – 7.80 (m, 1H), 7.68 – 7.51 (m, 1H), 7.19 – 7.05 (m, 1H), 4.87 (d,  $J = 1.3$  Hz, 1H), 4.81 (s, 1H), 2.32 (t,  $J = 7.5$  Hz, 2H), 1.70 – 1.48 (m, 2H), 1.45 – 1.25 (m, 2H), 0.91 (t,  $J = 7.3$  Hz, 3H).  $^{13}\text{C}$  NMR (125 MHz,  $\text{CDCl}_3$ )  $\delta$  160.16, 156.34, 134.03, 133.30, 132.92, 127.80, 101.38, 33.08, 28.55, 22.02, 13.77. IR (neat): 3116, 2956, 2932, 2873, 2864, 1725 (C=O), 1667, 1524, 1417, 1254, 1071, 864, 744; HRMS ESI ( $m/z$ ):  $[\text{MNa}]^+$  calcd. for  $\text{C}_{11}\text{H}_{14}\text{O}_4\text{SNa}$ , 233.0612; found, 233.0605.

**(E)-hex-1-en-2-yl hex-2-enoate 1j**

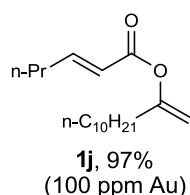

814 mg Compound **1j** was obtained in 97% yield according to general procedure B after chromatography (eluent: ethyl acetate: hexanes = 1: 30).  $^1\text{H}$  NMR (500 MHz,  $\text{CDCl}_3$ )  $\delta$  7.03 (dt,  $J = 15.6, 6.9$  Hz, 1H), 5.85 (dt,  $J = 15.4, 1.5$  Hz, 1H), 4.72 (d,  $J = 2.5$  Hz, 2H), 2.25 – 2.15 (m, 4H), 1.55 – 1.42 (m, 4H), 1.33 – 1.21 (m, 14H), 0.94 (t,  $J = 7.3$  Hz, 3H), 0.87 (t,  $J = 7.3$  Hz, 3H).  $^{13}\text{C}$  NMR (125 MHz,  $\text{CDCl}_3$ )  $\delta$  164.68, 156.58, 150.64, 120.88, 100.85, 100.84, 34.26, 33.37, 31.87, 29.55, 29.51, 29.34, 29.29, 28.97, 26.44, 22.65, 21.18, 14.06, 13.63. IR (neat): 3056, 2956, 2928, 2856, 1737 (C=O), 1654, 1466, 1379, 1319, 1218, 1158, 1120, 983, 866; HRMS ESI ( $m/z$ ):  $[\text{MNa}]^+$  calcd. for  $\text{C}_{18}\text{H}_{32}\text{O}_2\text{Na}$ , 303.2300; found, 303.2307.

**(E)-hex-1-en-2-yl 2-methylbut-2-enoate 1k**

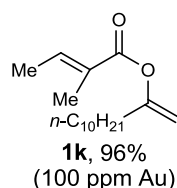

766 mg Compound **1j** was obtained in 96% yield according to general procedure B after chromatography (eluent: ethyl acetate: hexanes = 1: 30).  $^1\text{H}$  NMR (500 MHz,  $\text{CDCl}_3$ )  $\delta$  6.92 (dddd,  $J = 8.4, 7.1, 5.8, 1.4$  Hz, 1H), 4.78 – 4.58 (m, 2H), 2.23 (t,  $J = 7.5$  Hz, 2H), 1.87 – 1.84 (m, 3H), 1.81 (dd,  $J = 7.1, 1.0$  Hz, 3H), 1.49 – 1.41 (m, 2H), 1.34 (dq,  $J = 14.3, 7.1$  Hz, 2H), 0.89 (t,  $J = 7.3$  Hz, 2H).  $^{13}\text{C}$  NMR (125 MHz,  $\text{CDCl}_3$ )  $\delta$  166.17, 156.88, 138.35, 128.39, 100.72, 33.07, 28.63, 22.06, 14.43, 13.79, 12.02. IR (neat): 3118, 2957, 2927, 2856, 1720 (C=O), 1666, 1654, 1467, 1380, 1342, 1264, 1225, 1145, 1124, 1068, 868, 729; HRMS ESI ( $m/z$ ):  $[\text{MNa}]^+$  calcd. for  $\text{C}_{17}\text{H}_{30}\text{NaO}_2$ , 289.2144; found, 289.2138.

### (2E, 4E)-hex-1-en-2-yl hexa-2,4-dienoate **1l**

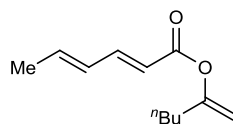

**1l**, 99%  
(65 ppm Au)

580 mg Compound **1l** was obtained in 99% yield according to general procedure B without chromatography.  $^1\text{H}$  NMR (500 MHz,  $\text{CDCl}_3$ )  $\delta$  7.37 – 7.20 (m, 1H), 6.30 – 6.06 (m, 2H), 5.79 (dd,  $J = 19.5, 15.7$  Hz, 1H), 4.78 – 4.67 (m, 2H), 2.23 (t,  $J = 7.5, 2\text{H}$ ), 1.86 (d,  $J = 5.8$  Hz, 3H), 1.50 – 1.40 (m, 2H), 1.34 (dq,  $J = 14.3, 7.1$  Hz, 2H), 0.89 (t,  $J = 7.3$  Hz, 3H).  $^{13}\text{C}$  NMR (125 MHz,  $\text{CDCl}_3$ )  $\delta$  165.33, 156.60, 146.12, 140.06, 129.68, 118.37, 100.85, 33.10, 28.57, 22.07, 18.65, 13.79. IR (neat): 3029, 2960, 2930, 2874, 2864, 1728 (C=O), 1646, 1617, 1329, 1228, 1177, 1128, 1000, 867; HRMS ESI ( $m/z$ ):  $[\text{MNa}]^+$  calcd. for  $\text{C}_{12}\text{H}_{18}\text{NaO}_2$ , 217.1204; found, 217.1205.

### dodec-1-en-2-yl cyclopropanecarboxylate **1m**

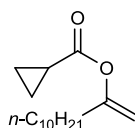

**1m**, 99%  
(75 ppm Au)

748 mg Compound **1m** was obtained in 99% yield according to general procedure B after chromatography (eluent: ethyl acetate: hexanes = 1: 30).  $^1\text{H}$  NMR (500 MHz,  $\text{CDCl}_3$ )  $\delta$  4.69 (d,  $J = 2.8$  Hz, 2H), 2.18 (t,  $J = 7.6$  Hz, 2H), 1.65 (qd,  $J = 6.8, 5.6, 2.7$  Hz, 1H), 1.45 (p,  $J = 7.4$  Hz, 2H), 1.27 (d,  $J = 12.5$  Hz, 15H), 1.08 – 1.02 (m, 2H), 0.93 – 0.89 (m, 2H), 0.87 (t,  $J = 6.8$  Hz, 3H).  $^{13}\text{C}$  NMR (125 MHz,  $\text{CDCl}_3$ )  $\delta$  173.00, 156.63, 100.78, 33.29, 31.87, 29.56, 29.51, 29.35, 29.30, 28.96, 28.96, 26.42, 22.65, 14.07, 12.93, 8.74. HRMS ESI ( $m/z$ ):  $[\text{MNa}]^+$  calcd. for  $\text{C}_{11}\text{H}_{14}\text{O}_4\text{SNa}$ , 275.1987; found, 275.1971.

### hex-1-en-2-yl adamantylcarboxylate **1n**

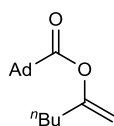

**1n** 99%  
(100 ppm Au)

778 mg Compound **1n** was obtained in 99% yield according to general procedure B after chromatography (eluent: ethyl acetate: hexanes = 1: 30). <sup>1</sup>H NMR (600 MHz, CDCl<sub>3</sub>) δ 4.68 (d, *J* = 1.0 Hz, 1H), 4.64 (s, 1H), 2.19 (t, *J* = 7.2 Hz, 2H), 2.03 (s, 3H), 1.93 (d, *J* = 2.9 Hz, 6H), 1.78 – 1.67 (m, 6H), 1.48 – 1.38 (m, 2H), 1.34 (dq, *J* = 14.3, 7.1 Hz, 2H), 0.90 (t, *J* = 7.3 Hz, 3H). <sup>13</sup>C NMR (125 MHz, CDCl<sub>3</sub>) δ 175.59, 156.65, 100.46, 40.76, 38.64, 36.35, 32.82, 28.44, 27.82, 21.94, 13.71. IR (neat): 3115, 2957, 2933, 2908, 2864, 1743 (C=O), 1666, 1454, 1212, 1181, 1065, 865, 736; HRMS ESI (*m/z*): [MNa]<sup>+</sup> calcd. for C<sub>17</sub>H<sub>26</sub>O<sub>2</sub>Na, 285.1830; found, 285.1821.

#### dodec-1-en-2-yl but-3-enoate **1o**

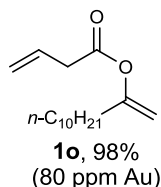

742 mg Compound **1o** was obtained in 98% yield according to general procedure B after chromatography (eluent: ethyl acetate: hexanes = 1: 30). <sup>1</sup>H NMR (500 MHz, CDCl<sub>3</sub>) δ 5.94 (ddt, *J* = 17.2, 10.2, 7.0 Hz, 1H), 5.25 – 5.08 (m, 2H), 4.71 (s, 3H), 3.16 (d, *J* = 7.0 Hz, 2H), 2.21 – 2.15 (m, 2H), 1.44 (p, *J* = 7.4 Hz, 2H), 1.35 – 1.20 (d, *J* = 11.8 Hz, 14H), 0.87 (t, *J* = 6.9 Hz, 3H). <sup>13</sup>C NMR (125 MHz, CDCl<sub>3</sub>) δ 169.54, 156.52, 129.83, 118.81, 101.02, 39.12, 33.21, 33.21, 31.86, 29.54, 29.49, 29.33, 29.28, 28.92, 26.36, 22.64, 14.05. IR (neat): 3118, 3085, 2957, 2927, 2856, 1757 (C=O), 1667, 1645, 1330, 1292, 1223, 1447, 1147, 992, 976, 921, 869; HRMS ESI (*m/z*): [MNa]<sup>+</sup> calcd. for C<sub>16</sub>H<sub>28</sub>O<sub>2</sub>Na, 275.1987; found, 275.1971.

#### dodec-1-en-2-yl 2,2,2-trifluoroacetate **1p**

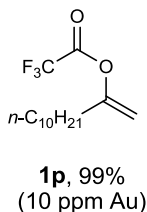

832 mg Compound **1p** was obtained in 99% yield according to general procedure B after chromatography (eluent: hexanes).  $^1\text{H}$  NMR (500 MHz,  $\text{CDCl}_3$ )  $\delta$  4.95 (d,  $J = 2.7$  Hz, 1H), 4.91 – 4.85 (m, 1H), 2.27 (t,  $J = 7.6$  Hz, 2H), 1.49 (p,  $J = 7.5$  Hz, 2H), 1.38 – 1.20 (m, 14H), 0.88 (t,  $J = 6.9$  Hz, 3H).  $^{13}\text{C}$  NMR (125 MHz,  $\text{CDCl}_3$ )  $\delta$  155.71, 155.40 (q,  $J = 42.5$  Hz), 114.50 (q,  $J = 283.75$  Hz), 102.43, 32.63, 31.91, 29.56, 29.48, 29.32, 29.27, 29.27, 28.79, 26.11, 22.69, 14.05.  $^{19}\text{F}$  NMR (376 MHz,  $\text{CDCl}_3$ )  $\delta$  -75.09. IR (neat): 2929, 2886, 2858, 1798 (C=O), 1675, 1468, 1360, 1228, 1172, 1142, 879, 771. HRMS FI ( $m/z$ ):  $[\text{M}]^+$  calcd. for  $\text{C}_{14}\text{H}_{23}\text{F}_3\text{O}_2$ , 280.1650; found, 280.1665.

#### dodec-1-en-2-yl 2,2,2-trichloroacetate **1q**

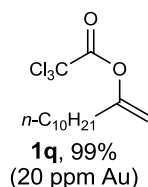

978 mg Compound **1q** was obtained in 99% yield according to general procedure B after chromatography (eluent: hexanes).  $^1\text{H}$  NMR (500 MHz,  $\text{CDCl}_3$ )  $\delta$  4.93 (d,  $J = 0.8$  Hz, 1H), 4.87 (d,  $J = 3.2$  Hz, 1H), 2.30 (t,  $J = 7.6$  Hz, 2H), 1.52 (p,  $J = 7.5$  Hz, 2H), 1.36 – 1.20 (m, 14H), 0.87 (t,  $J = 6.9$  Hz, 3H).  $^{13}\text{C}$  NMR (125 MHz,  $\text{CDCl}_3$ )  $\delta$  159.84, 156.69, 102.00, 89.78, 32.50, 32.50, 31.88, 29.54, 29.46, 29.30, 29.26, 28.79, 28.78, 26.16, 22.66, 14.08. IR (neat): 3121, 2957, 2928, 2856, 1779 (C=O), 1673, 1467, 1379, 1201, 1107, 961, 878, 823; HRMS ESI ( $m/z$ ):  $[\text{MNa}]^+$  calcd. for  $\text{C}_{14}\text{H}_{23}\text{Cl}_3\text{O}_2\text{Na}$ , 351.0661; found, 351.0650.

#### hex-1-en-2-yl 2-oxo-2-phenylacetate **1r**

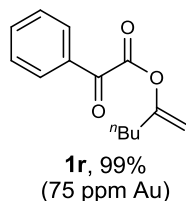

693 mg Compound **1r** was obtained in 99% yield according to general procedure B without chromatography.  $^1\text{H}$  NMR (600 MHz,  $\text{CDCl}_3$ )  $\delta$  8.10 – 7.95 (m, 2H), 7.67 (t,  $J = 7.4$  Hz, 1H), 7.52 (t,  $J = 7.8$  Hz, 2H), 5.00 – 4.84 (m, 2H), 2.34 (t,  $J = 7.6$  Hz, 2H), 1.52 (dt,  $J = 15.3, 7.5$  Hz, 2H), 1.45 – 1.31 (m, 2H), 0.92 (t,  $J = 7.3$  Hz, 3H).  $^{13}\text{C}$

NMR (150 MHz, CDCl<sub>3</sub>)  $\delta$  185.48, 161.70, 156.04, 135.00, 132.25, 129.95, 128.92, 102.10, 32.82, 28.33, 21.94, 13.72. IR (neat): 3066, 2960, 2934, 2874, 2864, 1752 (C=O), 1691 (C=O), 1598, 1452, 1322, 1193, 1168, 987, 878, 746; HRMS ESI ( $m/z$ ): [MNa]<sup>+</sup> calcd. for C<sub>14</sub>H<sub>16</sub>O<sub>3</sub>Na, 255.0997; found, 255.0988.

### hex-1-en-2-yl 2-phenoxyacetate **1s**

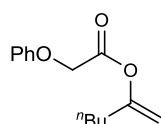

**1s**, 99%  
(100 ppm Au)

698 mg Compound **1s** was obtained in 99% yield according to general procedure B without chromatography. <sup>1</sup>H NMR (500 MHz, CDCl<sub>3</sub>)  $\delta$  7.33 – 7.28 (m, 2H), 7.01 (t,  $J$  = 7.4 Hz, 1H), 6.96 – 6.92 (m, 2H), 4.80 (d,  $J$  = 1.8 Hz, 1H), 4.77 (d,  $J$  = 1.6 Hz, 1H), 4.70 (s, 2H), 2.23 (t,  $J$  = 7.5 Hz, 2H), 1.42 (tt,  $J$  = 8.3, 6.9 Hz, 2H), 1.38 – 1.28 (m, 2H), 0.90 (t,  $J$  = 7.2 Hz, 3H). <sup>13</sup>C NMR (125 MHz, CDCl<sub>3</sub>)  $\delta$  166.95, 157.56, 155.89, 129.42, 129.41, 121.66, 114.48, 114.46, 101.31, 65.08, 32.79, 28.30, 21.86, 13.62. IR (neat): 3067, 2959, 2933, 2873, 2864, 1777 (C=O), 1652, 1668, 1601, 1590, 1497, 1459, 1458, 1438, 1379, 1162, 1108, 963, 876, 753; HRMS ESI ( $m/z$ ): [MNa]<sup>+</sup> calcd. for C<sub>14</sub>H<sub>18</sub>O<sub>3</sub>Na, 257.1154; found, 257.1144.

### 1-tert-butyl 2-hex-1-en-2-yl pyrrolidine-1,2-dicarboxylate **1t**

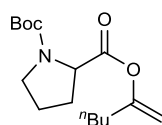

**1t**, 80%  
(600 ppm Au)

712 mg Compound **1t** was obtained in 80% yield according to general procedure B (600 ppm L8AuNTf<sub>2</sub>, 2500 ppm NaBAr<sup>F</sup><sub>4</sub>) after chromatography (eluent: ethyl acetate: hexanes = 1: 2). <sup>1</sup>H NMR (500 MHz, CDCl<sub>3</sub>)  $\delta$  4.79 – 4.59 (m, 2H), 4.33 (dd,  $J$  = 8.6, 3.6 Hz, 1H), 4.26 (dd,  $J$  = 8.7, 4.0 Hz, 1H), 3.59 – 3.31 (m, 2H), 2.34 – 2.13 (m, 3H), 2.07 – 1.78 (m, 3H), 1.46 – 1.42 (m, 4H), 1.40 (d,  $J$  = 6.5 Hz, 6H), 1.36 – 1.26 (m, 2H), 0.92 – 0.81 (m, 3H). <sup>13</sup>C NMR (126 MHz, CDCl<sub>3</sub>)  $\delta$  171.11, 156.47, 156.29, 154.20, 153.66, 100.78, 79.92, 79.66, 59.00, 58.91, 46.44, 46.26, 32.91,

32.80 , 30.89 , 29.87 , 28.44 , 28.37 , 28.31 , 28.25 , 24.28 , 23.46 , 21.94 , 13.71. IR (neat): 3116, 2976, 2961, 2934, 2876, 1763 (C=O), 1705 (C=O), 1396, 1152, 1088, 957, 871, 773; HRMS ESI ( $m/z$ ):  $[MNa]^+$  calcd. for  $C_{16}H_{27}NO_4Na$ , 320.1838; found, 320.1834.

### hex-1-en-2-yl 2-(1,3-dioxoisindolin-2-yl)-3-phenylpropanoate **1u**

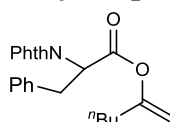

**1u**, 99%  
(150 ppm Au)

1128 mg Compound **1u** was obtained in 99% yield according to general procedure B without chromatography.  $^1H$  NMR (500 MHz,  $CDCl_3$ )  $\delta$  7.78 (dd,  $J = 5.4, 3.1$  Hz, 2H), 7.68 (dd,  $J = 5.5, 3.0$  Hz, 2H), 7.22 – 7.10 (m, 5H), 5.23 (dd,  $J = 11.3, 5.2$  Hz, 1H), 4.78 (d,  $J = 1.8$  Hz, 1H), 4.75 (d,  $J = 1.7$  Hz, 1H), 3.68 – 3.51 (m, 2H), 2.21 (td,  $J = 7.5, 4.5$  Hz, 2H), 1.40 (qd,  $J = 8.1, 7.5, 5.6$  Hz, 2H), 1.35 – 1.24 (m, 2H), 0.86 (t,  $J = 7.3$  Hz, 3H).  $^{13}C$  NMR (125 MHz,  $CDCl_3$ )  $\delta$  167.26, 167.08, 156.45, 136.51, 134.08, 131.50, 128.82, 128.51, 126.84, 123.42, 101.49, 53.24, 34.65, 32.73, 28.40, 21.94, 13.73. IR (neat): 3065, 2958, 2933, 2873, 2865, 1778 (C=O), 1759 (C=O), 1718 (C=O), 1669, 1607, 1498, 1468, 1288, 1222, 1170, 1105, 1000, 961, 915, 876, 720; HRMS ESI ( $m/z$ ):  $[MNa]^+$  calcd. for  $C_{23}H_{23}NO_4Na$ , 400.1525; found, 400.1515.

### 1-cyclohexylvinyl benzoate **1v**

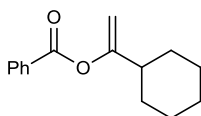

**1v**, 99%  
(100 ppm Au)

686 mg Compound **1v** was obtained in 99% yield according to general procedure B without chromatography.  $^1H$  NMR (600 MHz,  $CDCl_3$ )  $\delta$  8.16 – 8.03 (m, 2H), 7.59 (t,  $J = 7.4$  Hz, 1H), 7.47 (t,  $J = 7.8$  Hz, 2H), 4.91 – 4.76 (m, 2H), 2.25 (td,  $J = 10.7, 3.0$  Hz, 1H), 1.99 (t,  $J = 10.5$  Hz, 2H), 1.87 – 1.73 (m, 2H), 1.72 – 1.64 (m, 2H), 1.34 – 1.13 (m, 6H).  $^{13}C$  NMR (150 MHz,  $CDCl_3$ )  $\delta$  164.82, 160.66, 133.17, 129.94, 129.87, 128.40, 99.61, 41.80, 30.62, 26.05, 25.94. IR (neat): 3064, 2930, 2855, 1733 (C=O),



1661, 1601, 1451, 1314, 1271, 1240, 1194, 1169, 1133, 1092, 1068, 1026, 872, 705;  
HRMS ESI ( $m/z$ ): [MNa]<sup>+</sup> calcd. for C<sub>15</sub>H<sub>18</sub>NO<sub>2</sub>Na, 253.1208; found, 253.1204.

#### 6-chlorohex-1-en-2-yl benzoate **1w**

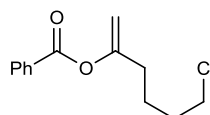

**1w**, 95%  
(300 ppm Au)  
no NaBAR<sup>F</sup><sub>4</sub>

678 mg Compound **1w** was obtained in 95% yield when 1,2-dichloroethane was used as a solvent instead of PhF. (0.5 M, 300 ppm **L8**AuNTf, no NaBAR<sup>F</sup><sub>4</sub>) after chromatography (eluent: ethyl acetate: hexanes = 1: 30). <sup>1</sup>H NMR (600 MHz, CDCl<sub>3</sub>) δ 8.09 (t,  $J$  = 8.4 Hz, 2H), 7.67 – 7.53 (m, 1H), 7.47 (t,  $J$  = 7.7 Hz, 2H), 4.88 (d,  $J$  = 21.0 Hz, 2H), 3.63 – 3.48 (m, 2H), 2.39 (t,  $J$  = 7.5 Hz, 2H), 1.88 (qd,  $J$  = 14.9, 6.9 Hz, 2H), 1.76 – 1.63 (m, 2H). <sup>13</sup>C NMR (150 MHz, CDCl<sub>3</sub>) δ 164.68, 155.79, 133.33, 129.88, 129.69, 128.45, 101.96, 44.64, 32.64, 31.70, 23.72. IR (neat): 3064, 2955, 2870, 2847, 1730 (C=O), 1667, 1602, 1492, 1452, 1272, 1026, 875, 801, 746; HRMS ESI ( $m/z$ ): [MNa]<sup>+</sup> calcd. for C<sub>13</sub>H<sub>15</sub>ClO<sub>2</sub>Na, 261.0658; found, 261.0654.

#### 4-(triisopropylsilyloxy)but-1-en-2-yl benzoate **1x**

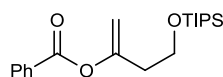

**1x**, 98%  
(120 ppm Au)

1023 mg Compound **1x** was obtained in 98% yield according to general procedure B (2500 ppm NaBAR<sup>F</sup><sub>4</sub>) after chromatography (eluent: ethyl acetate: hexanes = 1: 50). <sup>1</sup>H NMR (500 MHz, CDCl<sub>3</sub>) δ 8.13 – 8.01 (m, 2H), 7.69 – 7.52 (m, 1H), 7.50 – 7.37 (m, 2H), 5.00 – 4.84 (m, 2H), 3.89 (td,  $J$  = 6.6, 0.8 Hz, 2H), 2.69 – 2.51 (m, 2H), 1.17 – 0.97 (m, 21H). <sup>13</sup>C NMR (125 MHz, CDCl<sub>3</sub>) δ 164.74, 153.83, 133.27, 129.92, 128.41, 103.97 – 103.59 (m), 103.15, 99.07, 60.64, 37.38, 17.96, 11.95. IR (neat): 3064, 2944, 2893, 2867, 1736 (C=O), 1670, 1602, 1464, 1384, 1268, 1233, 1175, 1092, 1069, 1026, 882, 706; HRMS ESI ( $m/z$ ): [MNa]<sup>+</sup> calcd. for C<sub>20</sub>H<sub>32</sub>NaO<sub>3</sub>Si, 371.2018; found, 371.2020.

#### 4-(benzyloxy)but-1-en-2-yl benzoate **1y**

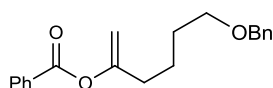

**1y**, 89%  
(150 ppm Au)

828 mg Compound **1y** was obtained in 89% yield according to general procedure B (2500 ppm NaBAr<sup>F</sup><sub>4</sub>) after chromatography (eluent: ethyl acetate: hexanes = 1: 20). <sup>1</sup>H NMR (500 MHz, CDCl<sub>3</sub>) δ 8.15 – 7.97 (m, 2H), 7.63 – 7.54 (m, 1H), 7.47 (t, *J* = 7.8 Hz, 2H), 7.38 – 7.17 (m, 5H), 4.89 (d, *J* = 1.6 Hz, 1H), 4.87 – 4.85 (m, 1H), 4.51 (s, 2H), 3.51 (t, *J* = 6.1 Hz, 2H), 2.38 (t, *J* = 7.2 Hz, 2H), 1.77 – 1.51 (m, 4H). <sup>13</sup>C NMR (125 MHz, CDCl<sub>3</sub>) δ 164.69, 156.34, 138.51, 133.23, 129.88, 129.81, 128.41, 128.29, 127.54, 127.44, 101.59, 72.82, 69.88, 33.19, 29.02, 23.22. IR (neat): 3185, 2962, 2935, 2873, 2876, 1761 (C=O), 1674, 1250, 1217, 847, 833; HRMS ESI (*m/z*): [MNa]<sup>+</sup> calcd. for C<sub>20</sub>H<sub>22</sub>O<sub>3</sub>Na, 333.1467; found, 333.1453.

#### 3-methylbuta-1,3-dien-2-yl benzoate **1z**

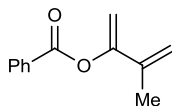

**1z**, 97% (60 °C,  
1500 ppm Au)

547 mg Compound **1z** was obtained in 97% yield according to general procedure B (2 equiv 2-methylbut-1-en-3-yne, 5000 ppm NaBAr<sup>F</sup><sub>4</sub>, 60 °C) after chromatography (eluent: ethyl acetate: hexanes = 1: 20). <sup>1</sup>H NMR (500 MHz, CDCl<sub>3</sub>) δ 8.16 (dtd, *J* = 8.1, 2.1, 1.3 Hz, 1H), 7.67 – 7.57 (m, 1H), 7.55 – 7.42 (m, 1H), 5.32 – 5.14 (m, 2H), 5.04 (ddd, *J* = 7.9, 2.9, 1.5 Hz, 2H), 2.01 (d, *J* = 0.7 Hz, 3H). <sup>13</sup>C NMR (125 MHz, CDCl<sub>3</sub>) δ 165.13 – 164.49 (m), 154.09 – 153.24 (m), 136.63, 133.45, 130.04, 129.68 – 129.31 (m), 128.54, 113.92, 103.60, 19.46. IR (neat): 3063, 2976, 2954, 2928, 2902, 2855, 1738 (C=O), 1603, 1452, 1263, 1152, 1090, 1068, 1026, 887, 707; HRMS EI (*m/z*): [M]<sup>+</sup> calcd. for C<sub>12</sub>H<sub>12</sub>O<sub>2</sub>, 188.0837; found, 188.0835.

**(Z)-hex-3-en-3-yl benzoate 1aa**

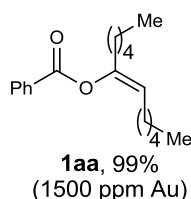

855 mg Compound **1aa** was obtained in 99% yield according to general procedure B (5000 ppm NaBAr<sup>F</sup><sub>4</sub>) after chromatography (eluent: ethyl acetate: hexanes = 1: 30). <sup>1</sup>H NMR (500 MHz, CDCl<sub>3</sub>) δ 8.12 (dt, *J* = 8.4, 1.6 Hz, 2H), 7.83 – 7.54 (m, 1H), 7.54 – 7.40 (m, 2H), 5.11 (t, *J* = 7.3 Hz, 1H), 2.41 – 2.19 (m, 2H), 1.97 (q, *J* = 7.3 Hz, 2H), 1.57 – 1.45 (m, 2H), 1.43 – 1.16 (m, 10H), 0.98 – 0.74 (m, 6H). <sup>13</sup>C NMR (125 MHz, CDCl<sub>3</sub>) δ 164.39, 148.58, 133.10, 129.91, 129.87, 128.40, 116.53, 33.43, 31.36, 31.23, 28.77, 26.37, 25.31, 22.41, 22.40, 13.98, 13.96. IR (neat): 3064, 2957, 2930, 2872, 2859, 1733 (C=O), 1452, 1259, 1089, 1068, 1026, 708; HRMS ESI (*m/z*): [MNa]<sup>+</sup> calcd. for C<sub>19</sub>H<sub>28</sub>O<sub>2</sub>Na, 311.1987; found, 311.1977.

**(Z)-5-(benzyloxy)pent-2-en-2-yl benzoate 1ab + (Z)-5-(benzyloxy)pent-2-en-3-yl benzoate 1ab'**

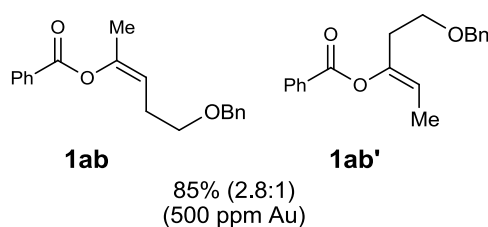

755 mg Compounds **1ab and 1ab'** were obtained in 85% yield (2.8:1) according to general procedure B (2500 ppm NaBAr<sup>F</sup><sub>4</sub>) after chromatography (eluent: ethyl acetate: hexanes = 1: 15). <sup>1</sup>H NMR (500 MHz, CDCl<sub>3</sub>) δ 8.15 – 8.07 (m, 2H), 7.64 – 7.58 (m, 1H), 7.52 – 7.46 (m, 2H), 7.38 – 7.26 (m, 5H), 5.31 (qd, *J* = 6.8, 0.9 Hz, 0.25H), 5.25 – 5.19 (m, 0.73H), 4.54 (s, 0.52H), 4.51 (s, 1.55H), 3.65 (td, *J* = 6.6, 1.1 Hz, 0.53H), 3.50 (td, *J* = 6.8, 1.1 Hz, 1.56H), 2.70 – 2.61 (m, 0.52H), 2.41 – 2.30 (m, 1.57H), 2.07 – 1.99 (m, 2.35H), 1.59 (dd, *J* = 6.8, 1.2 Hz, 3H). <sup>13</sup>C NMR (125 MHz, CDCl<sub>3</sub>) δ 164.32, 164.25, 146.42, 146.26, 138.34, 138.23, 133.24, 133.21, 129.91, 129.89, 129.65, 129.60, 128.41, 128.27, 127.60, 127.57, 127.47, 127.46, 113.45,

112.85, 72.86, 72.75, 69.24, 67.26, 34.22, 26.19, 19.63, 10.81. HRMS ESI ( $m/z$ ):  $[\text{MNa}]^+$  calcd. for  $\text{C}_{19}\text{H}_{20}\text{O}_3\text{Na}$ , 319.1310; found, 319.1313.

### (Z)-3-ethoxy-3-oxo-1-phenylprop-1-enyl benzoate **1ac**

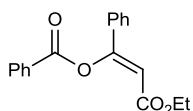

**1ac**, 98%  
(150 ppm Au)

870 mg Compound **1ac** was obtained in 98% yield according to general procedure B after chromatography (eluents: ethyl acetate: hexanes = 1: 4). This compound is known and the spectrum are consistent with literature data.<sup>[49]</sup>  $^1\text{H}$  NMR (500 MHz,  $\text{CDCl}_3$ )  $\delta$  8.23 (dd,  $J = 8.3, 1.2$  Hz, 2H), 7.72 – 7.59 (m, 3H), 7.53 (dd,  $J = 10.8, 4.8$  Hz, 2H), 7.47 – 7.34 (m, 3H), 6.38 (s, 1H), 4.13 (q,  $J = 7.1$  Hz, 2H), 1.15 (t,  $J = 7.1$  Hz, 3H).  $^{13}\text{C}$  NMR (125 MHz,  $\text{CDCl}_3$ )  $\delta$  164.08, 163.82, 157.83, 133.70, 133.45, 130.95, 130.37, 129.11, 128.84, 128.64, 125.95, 106.84, 60.38, 14.05. IR (neat): 2918, 2951, 1742 (C=O), 1714, 1636, 1449, 1279, 1234, 1157, 1080, 1064, 1023, 765; HRMS ESI ( $m/z$ ):  $[\text{MNa}]^+$  calcd. for  $\text{C}_{18}\text{H}_{16}\text{O}_4\text{Na}$ , 319.0946; found, 319.0943.

### General procedure C: Preparation of Amides by a One-pot Sequence

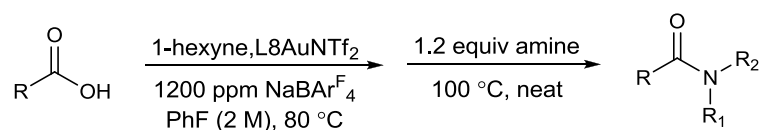

In a sealed 1 dr reaction vial equipped with a magnetic stirring bar, 3 mmol carboxylic acids (1 equiv), 4.4 mmol 1-hexyne (1.45 equiv) and 3.1 mg  $\text{NaBARF}_4$  (1200 ppm) were added to 0.6 mL fluorobenzene. **L8AuNTf<sub>2</sub>** (50  $\mu\text{L}$  of a 3.09 mg/mL solution in PhF, 0.150  $\mu\text{mol}$ , 50 ppm or 100  $\mu\text{L}$ , 100 ppm) was added to the above vial and then the reaction mixture was heated at 80 °C for 12 - 18 h. Once the reaction finished by TLC, it was concentrated and left on the high vacuum pump for overnight to give the crude product, followed by adding 3.6 mmol amine (1.2 equiv) and stirring at 100 °C for 6 - 24 h. Once the reaction completed by TLC, the mixture was purified through

silica gel flash chromatography (eluents: ethyl acetate: hexanes = 1: 3) to give the desired product.

### ***N*-phenethylbenzamide**

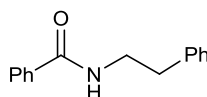

*N*-phenethylbenzamide was obtained in 96% overall yield according to general procedure C. This compound is known and the spectrum are consistent with literature data.

[50]

### **phenyl(piperidin-1-yl)methanone**

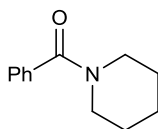

Phenyl(piperidin-1-yl)methanone was obtained in 93% overall yield according to general procedure C. This compound is known and the spectrum are consistent with literature data.<sup>[51]</sup>

### **1-(piperidin-1-yl)hexan-1-one**

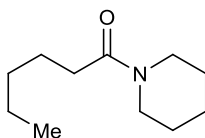

1-(Piperidin-1-yl)hexan-1-one was obtained in 94% overall yield according to general procedure C. This compound is known and the spectrum are consistent with literature data.<sup>[52]</sup>

### ***N*-phenylhexanamide**

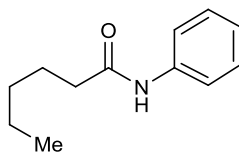

*N*-Phenylhexanamide was obtained in 90% overall yield according to general procedure C. This compound is known and the spectrum are consistent with literature data.<sup>[53]</sup>

## **DFT calculation results**

### **The four optimized transition states**

Two transition structures were obtained for  $\text{NTf}_2^-$  activation mode (**TS-NTf<sub>2</sub>** and **TS-NTf<sub>2</sub>'**) and the amide group activation mode (**TS-Amide** and **TS-Amide'**), respectively (shown in Supplementary Figure 159). For the Calculated total energies and geometrical coordinates, please see Supplementary Data 1.

## Supplementary References

- (47) Samanta, D.; Sawoo, S.; Patra, S.; Ray, M.; Salmain, M.; Sarkar, A., Synthesis of hydrophilic Fischer carbene complexes as organometallic marker and PEGylating agent for proteins, *Journal of Organometallic Chemistry*, **690**, 5581-5590(2005).
- (48) Cheng, X.; Hou, G.-H.; Xie, J.-H.; Zhou, Q.-L., Synthesis and Optical Resolution of 9,9'-Spirobifluorene-1,1'-diol, *Organic Letters*, **6**, 2381-2383(2004).
- (49) Yoo, W.-J.; Li, C.-J., Highly Stereoselective Oxidative Esterification of Aldehydes with  $\beta$ -Dicarbonyl Compounds, *The Journal of Organic Chemistry*, **71**, 6266-6268(2006).
- (50) Prasad, V.; Kale, R. R.; Mishra, B. B.; Kumar, D.; Tiwari, V. K., Diacetoxyiodobenzene Mediated One-Pot Synthesis of Diverse Carboxamides from Aldehydes, *Organic Letters*, **14**, 2936-2939(2012).
- (51) Ren, W.; Yamane, M., Mo(CO)<sub>6</sub>-Mediated Carbamoylation of Aryl Halides, *The Journal of Organic Chemistry*, **75**, 8410-8415(2010).
- (52) Wei, W.; Hu, X.-Y.; Yan, X.-W.; Zhang, Q.; Cheng, M.; Ji, J.-X., Direct use of dioxygen as an oxygen source: catalytic oxidative synthesis of amides, *Chemical Communications*, **48**, 305-307(2012).
- (53) Tian, J.; Gao, W.-C.; Zhou, D.-M.; Zhang, C., Recyclable Hypervalent Iodine(III) Reagent Iodosodilactone as an Efficient Coupling Reagent for Direct Esterification, Amidation, and Peptide Coupling, *Organic Letters*, **14**, 3020-3023(2012).
